# Supplementary material
Source: PubMed Central journal article supplement (PMC3811820)
Supplement: IAI.00880-13_zii999090360so1.pdf [file IAI.00880-13_zii999090360so1.pdf]

Table S1. Significant differentially expressed genes ( $p < 0.05$ ;  $FC^* > 1.5$ ): R88 vs R115 ( $\Delta ypeIR \Delta ypsIR \Delta luxS::Kan$ ) cells, 37°C.

| ID      | <i>p</i> value | <i>q</i> value | FC       | qRT-PCR | Gene                    | Gene function                                              | Process                                                             | COG     | COG function categories |
|---------|----------------|----------------|----------|---------|-------------------------|------------------------------------------------------------|---------------------------------------------------------------------|---------|-------------------------|
| YPO3300 | 8.43E-06       | 0.014634       | 15.78247 |         | <i>luxS</i>             | Autoinducer-2 production protein                           | AI-2                                                                | COG1854 | T                       |
| YPO4080 | 0.003415       | 0.119003       | 8.030124 |         | <i>malS</i>             | Alpha-amylase protein                                      | Maltose operon                                                      | COG0366 | G                       |
| YPO3711 | 0.001863       | 0.09505        | 7.907408 | 12.52   | <i>lamB, malB</i>       | Maltoporin                                                 | Maltose operon                                                      |         |                         |
| YPO0832 | 0.00465        | 0.136149       | 6.506489 | 5.87    | <i>agaZ</i>             | Putative tagatose 6-phosphate kinase                       | Degradation of carbon compounds                                     |         |                         |
| YPO3788 | 8.67E-06       | 0.014634       | 5.295196 | 19.64   | <i>metE</i>             | 5-methyltetrahydropteroyltriglutamate--homocysteine        | Aspartate family biosynthesis                                       | COG0620 | E                       |
| YPO3681 | 0.000167       | 0.041071       | 5.182046 |         |                         | Putative insecticidal toxin                                | Pathogenicity                                                       | COG1196 | D                       |
| YPO0324 | 0.004904       | 0.139505       | 5.05309  |         | <i>uvrA, dinE, b458</i> | Excinuclease ABC subunit A                                 | DNA replication, restriction/modification, recombination and repair | COG0178 | L                       |
| malF    | 0.009932       | 0.172851       | 4.550331 |         | <i>malF</i>             | Maltose transport system permease protein                  | Maltose operon                                                      |         |                         |
| YPO3714 | 0.027757       | 0.236717       | 4.393824 |         | <i>malE</i>             | Maltose-binding periplasmic protein precursor              | Maltose operon                                                      | COG2182 | G                       |
| YPO0845 | 0.000151       | 0.041071       | 4.381101 |         |                         | ThiJ,PfpI-family thiamine biogenesis protein               | Thiamine Biosynthesis                                               | COG0693 | R                       |
| YPO0325 | 9.64E-05       | 0.041071       | 4.312423 |         | <i>ssb, exrB, lexC</i>  | Single-strand binding protein                              | DNA replication, restriction/modification, recombination and repair | COG0629 | L                       |
| YPO3200 | 0.000228       | 0.043857       | 4.061693 |         | <i>malZ</i>             | Putative maltodextrin glucosidase                          | Maltose operon                                                      | COG0366 | G                       |
| YPO0844 | 0.000234       | 0.043857       | 4.059663 |         | <i>agaY, kba</i>        | Putative aldolase                                          | Degradation of carbon compounds                                     | COG0191 | G                       |
| malK    | 0.008457       | 0.163608       | 4.003624 |         | <i>malK</i>             | Maltose,maltodextrin transport ATP-binding protein         | Maltose operon                                                      |         |                         |
| YPO3716 | 0.003894       | 0.12735        | 3.819044 |         | <i>malG</i>             | Maltose transport system permease protein                  | Maltose operon                                                      | COG0395 | G                       |
| YPO0286 | 0.021274       | 0.208418       | 3.783691 |         |                         | Putative coproporphyrinogen III oxidase                    | Heme and porphyrin Biosynthesis                                     | COG0635 | H                       |
| YPO0931 | 0.000107       | 0.041071       | 3.581566 |         | <i>metK</i>             | S-adenosylmethionine synthetase                            | Central intermediary metabolism                                     | COG0192 | H                       |
| YPO3710 | 0.006463       | 0.15096        | 3.568695 |         | <i>malM, mola</i>       | Maltose operon periplasmic protein                         | Maltose operon                                                      |         |                         |
| YPO3715 | 0.006972       | 0.153829       | 3.496981 |         | <i>malF</i>             | Maltose transport system permease protein                  | Maltose operon                                                      | COG1175 | G                       |
| YPO0285 | 0.015452       | 0.192194       | 3.472935 |         |                         | Conserved hypothetical protein                             | Unknown                                                             |         |                         |
| YPO0821 | 0.037416       | 0.258303       | 3.427051 |         |                         | Hypothetical protein                                       | Unknown                                                             | COG0086 | K                       |
| YPO0284 | 0.010056       | 0.172851       | 3.271341 |         |                         | Conserved hypothetical protein                             | Unknown                                                             | COG0702 | MG                      |
| YPO3712 | 0.016969       | 0.193113       | 3.269706 |         | <i>malK</i>             | Maltose,maltodextrin transport ATP-binding protein         | Maltose operon                                                      | COG1130 | G                       |
| agaY    | 0.001364       | 0.090259       | 3.212341 |         | <i>agaY, kba</i>        | Putative aldolase                                          | Degradation of carbon compounds                                     |         |                         |
| YPO0822 | 0.045111       | 0.286789       | 3.095037 |         |                         | Putative exported protein                                  | Membranes, lipoproteins and porins                                  |         |                         |
| malG    | 0.007692       | 0.156319       | 3.068227 |         | <i>malG</i>             | Maltose transport system permease protein                  | Maltose operon                                                      |         |                         |
| YPO0626 | 0.002127       | 0.101111       | 3.059648 |         |                         | Conserved hypothetical protein                             | Unknown                                                             | COG2964 | S                       |
| YPO0627 | 0.002363       | 0.106347       | 3.052314 |         |                         | Putative translational inhibitor protein                   | Unknown                                                             | COG0251 | J                       |
| YPO0833 | 0.04228        | 0.277144       | 3.044388 |         |                         | Putative phosphosugar isomerase                            | Degradation of carbon compounds                                     | COG2222 | M                       |
| YPO3713 | 0.011278       | 0.172851       | 3.037394 |         |                         | Hypothetical protein                                       | Unknown                                                             |         |                         |
| YPO3631 | 0.001315       | 0.090259       | 2.787653 |         |                         | Putative exported protein                                  | Membranes, lipoproteins and porins                                  |         |                         |
| YPO0319 | 0.001137       | 0.089242       | 2.390972 |         | <i>gor, hcz, b451</i>   | Quinone oxidoreductase                                     | Degradation of small molecule                                       | COG0604 | CR                      |
| YPO0415 | 0.027009       | 0.236717       | 2.321701 |         | <i>lsrK</i>             | Kinase phosphorylates carbon-5 of the open end of the A1-2 | AI-2                                                                | COG1070 | G                       |
| YPO3738 | 0.003902       | 0.12735        | 2.191311 |         |                         | Hypothetical protein                                       | Unknown                                                             |         |                         |
| YPO0842 | 0.01728        | 0.193113       | 2.155451 |         |                         | Putative sulfatase                                         | Sulphur metabolism                                                  | COG3119 | P                       |
| YPO1241 | 0.00033        | 0.053827       | 2.150069 |         |                         | Putative bacteriophage protein                             | Phage-related functions and prophage                                | COG0234 | O                       |
| YPO1108 | 0.000787       | 0.083063       | 2.118482 |         | <i>gltA, gluT, icdB</i> | Citrate synthase GltA                                      | Tricarboxylic acid cycle                                            | COG0372 | C                       |
| YPO3682 | 0.00071        | 0.077266       | 2.096984 |         |                         | Putative lysR-family transcriptional regulator             | Broad regulatory functions                                          | COG0583 | K                       |
| YPO0628 | 0.007204       | 0.15491        | 2.080275 |         |                         | Putative translational inhibitor protein                   | Unknown                                                             | COG0251 | J                       |
| YPO2975 | 0.005024       | 0.139505       | 2.044596 |         |                         | Putative aminotransferase                                  | Unknown                                                             | COG0436 | E                       |
| YPO0839 | 0.001355       | 0.090259       | 2.032975 |         | <i>kduD2</i>            | 2-deoxy-D-gluconate 3-dehydrogenase                        | Degradation of carbon compounds                                     | COG1028 | IQR                     |
| YPO3050 | 0.044882       | 0.285875       | 1.987743 |         |                         | Putative exported protein                                  | Membranes, lipoproteins and porins                                  | COG1840 | P                       |
| YPO0316 | 0.0278         | 0.236717       | 1.969934 |         |                         | Conserved hypothetical protein                             | Unknown                                                             | COG0042 | J                       |

|          |          |          |          |                        |                                                       |                                                                |         |      |
|----------|----------|----------|----------|------------------------|-------------------------------------------------------|----------------------------------------------------------------|---------|------|
| YPO0401  | 0.029592 | 0.244243 | 1.951308 |                        | Putative transcriptional regulator                    | Broad regulatory functions                                     | COG2207 | K    |
| YPO3070  | 0.015151 | 0.191354 | 1.938084 | <i>yfgD</i>            | Putative arsenate reductase                           | Drug/analogue sensitivity                                      | COG1393 | P    |
| YPO1242  | 0.000654 | 0.076151 | 1.903321 |                        | Putative bacteriophage tail sheath protein            | Phage-related functions and prophage                           |         |      |
| YPO2623  | 0.00348  | 0.119349 | 1.899328 | <i>asnB</i>            | Asparagine synthetase B                               | Aspartate family biosynthesis                                  | COG0367 | E    |
| YPO1240  | 0.003183 | 0.11824  | 1.889477 |                        | Putative ATP-binding protein                          | Unknown                                                        |         |      |
| YPO3566  | 0.021059 | 0.207866 | 1.852804 | <i>degQ, hhoA</i>      | Protease                                              | Degradation of Proteins, peptides and glycopeptides            | COG0265 | O    |
| YPO0841  | 0.013741 | 0.184497 | 1.832718 |                        | Putative regulatory protein                           | Broad regulatory functions                                     | COG0641 | R    |
| YPO0948  | 0.036307 | 0.253758 | 1.79535  |                        | Conserved hypothetical protein (pseudogene)           | Unknown                                                        |         |      |
| YPO3789  | 0.035857 | 0.25256  | 1.778731 | <i>metR</i>            | LysR-family transcriptional regulatory protein        | Broad regulatory functions                                     | COG0583 | K    |
| YPO3658  | 0.045842 | 0.28872  | 1.774289 | <i>accC, fabG</i>      | Biotin carboxylase                                    | Fatty acid biosynthesis                                        | COG0439 | I    |
| YPO3741  | 0.001034 | 0.085175 | 1.739504 | <i>thiF</i>            | Thiamine biosynthesis protein ThiF                    | Thiamine Biosynthesis                                          | COG0476 | H    |
| YPO2907  | 0.011434 | 0.172851 | 1.735855 | <i>glyA</i>            | Serine hydroxymethyltransferase                       | Central intermediary metabolism                                | COG0112 | E    |
| YPO1072  | 0.016064 | 0.192194 | 1.722196 |                        | ABC transporter permease protein                      | Transport/binding proteins                                     | COG2011 | P    |
| YPO3991  | 0.010986 | 0.172851 | 1.721335 |                        | Putative insulinase family protease                   | Degradation of Proteins, peptides and glycopeptides            | COG0612 | R    |
| YPO0569a | 0.002185 | 0.10244  | 1.696895 |                        | Conserved hypothetical protein                        | Unknown                                                        |         |      |
| YPO1683  | 0.033296 | 0.247878 | 1.661798 |                        | Probable N-acetylmuramoyl-L-alanine amida             | Degradation of Proteins, peptides and glycopeptides            | COG3023 | V    |
| YPO2974  | 0.027644 | 0.236717 | 1.656323 |                        | Putative B-type cytochrome                            | Electron transport                                             | COG3038 | C    |
| YPO3740  | 0.008972 | 0.167713 | 1.645592 | <i>thiE</i>            | Thiamine-phosphate pyrophosphorylase                  | Thiamine Biosynthesis                                          | COG0352 | H    |
| YPO1548  | 0.012259 | 0.175355 | 1.643618 | <i>hisD</i>            | Histidinol dehydrogenase                              | Histidine biosynthesis                                         | COG0141 | E    |
| YPO3727  | 0.019177 | 0.200985 | 1.632806 | <i>metA</i>            | Homoserine O-succinyltransferase                      | Aspartate family biosynthesis                                  | COG1897 | E    |
| YPO1501  | 0.012251 | 0.175355 | 1.624662 |                        | Putative esterase                                     | Unknown                                                        | COG0627 | R    |
| YPO1654  | 0.007724 | 0.156319 | 1.622389 | <i>lacZ</i>            | Beta-galactosidase                                    | Lactose operon                                                 | COG3250 | G    |
| YPO3049  | 0.001267 | 0.090259 | 1.615913 |                        | Putative binding protein-dependent transport          | Transport/binding proteins                                     | COG1178 | P    |
| YPO2162  | 0.037573 | 0.258855 | 1.613329 | <i>sppA</i>            | Protease IV                                           | Degradation of Proteins, peptides and glycopeptides            | COG0616 | OU   |
| YPO3237  | 0.000225 | 0.043857 | 1.608658 | <i>nqrD, nqr4</i>      | Na <sup>+</sup> -translocating NADH-quinone reductase | Electron transport                                             | COG1347 | C    |
| YPO1244  | 0.010556 | 0.172851 | 1.606086 |                        | Hypothetical protein                                  | Unknown                                                        |         |      |
| YPO1383  | 0.016335 | 0.19281  | 1.590741 | <i>pflB, pfl</i>       | Formate acetyltransferase 1                           | Anaerobic respiration                                          | COG1882 | C    |
| YPO1547  | 0.002986 | 0.115868 | 1.586611 | <i>hisC</i>            | Histidinol-phosphate aminotransferase                 | Histidine biosynthesis                                         | COG0079 | E    |
| YPO0318  | 0.033351 | 0.247878 | 1.584549 | <i>pspG</i>            | Putative exported protein                             | Membranes, lipoproteins and porins                             | COG1175 | G    |
| YPO3069  | 0.005989 | 0.148668 | 1.581858 |                        | Putative exported protein                             | Membranes, lipoproteins and porins                             | COG0501 | O    |
| YPO0091  | 0.011141 | 0.172851 | 1.571138 | <i>glpF</i>            | Glycerol uptake facilitator protein                   | Membranes, lipoproteins and porins                             | COG0580 | G    |
| YPO3235  | 0.001759 | 0.09505  | 1.567371 | <i>nqrF, nqr6</i>      | NADH-ubiquinone oxidoreductase subunit F              | Electron transport                                             | COG2871 | C    |
| YPO0287  | 0.045541 | 0.287764 | 1.562364 |                        | Putative methylenetetrahydrofolate reductase          | Aspartate family biosynthesis                                  | COG0685 | E    |
| YPMT1.74 | 0.031171 | 0.247878 | 1.559554 |                        |                                                       |                                                                | COG1502 | I    |
| YPO2815  | 0.025345 | 0.228164 | 1.538334 |                        | Putative acyltransferase                              | Unknown                                                        | COG0204 | I    |
| YPO0525  | 0.005609 | 0.145179 | 1.536643 |                        | Hypothetical protein                                  | Unknown                                                        |         |      |
| YPO0397  | 0.02322  | 0.217447 | 1.536643 |                        | Hypothetical protein                                  | Unknown                                                        |         |      |
| YPO1641  | 0.010866 | 0.172851 | 1.53526  | <i>icdA, icd, icdE</i> | Isocitrate dehydrogenase [NADP]                       | Tricarboxylic acid cycle                                       | COG0538 | C    |
| YPO1098  | 0.034706 | 0.249875 | 1.525009 |                        | Putative prophage integrase                           |                                                                | COG0582 | L    |
| YPO1570  | 0.012677 | 0.1781   | 1.524094 | <i>argG</i>            | Argininosuccinate synthase                            | Glutamate family biosynthesis                                  | COG0137 | E    |
| YPO2270  | 0.033483 | 0.247878 | 1.500652 |                        | Putative membrane protein                             | Membranes, lipoproteins and porins                             | COG0038 | P    |
| YPO1866  | 0.027686 | 0.236717 | -1.50441 | <i>uvrC</i>            | Excinuclease ABC subunit C                            | DNA replication, restriction/modification, recombination and r | COG0322 | L    |
| YPO0727  | 0.001243 | 0.090259 | -1.50471 | <i>flgF</i>            | Putative flagellar basal-body rod protein (pse)       | Chemotaxis and mobility                                        |         |      |
| YPO0881  | 0.023712 | 0.218705 | -1.5124  |                        | Conserved hypothetical protein                        | Unknown                                                        | COG2944 | K    |
| caf1M    | 0.008    | 0.159797 | -1.5174  | <i>caf1M</i>           | Putative F1 chaperone protein, caf1M                  |                                                                |         |      |
| YPO3365  | 0.049898 | 0.29892  | -1.51771 | <i>cysN</i>            | Sulfate adenylyltransferase subunit 1                 | Sulphur metabolism                                             | COG2895 | P    |
| YPO2904  | 0.021362 | 0.208418 | -1.52288 | <i>hcaT</i>            | Putative transport permease protein                   | Transport/binding Carbohydrates,organic acids and alcohols     | COG0477 | GEPR |

|          |          |          |          |                          |                                               |                                                            |         |      |
|----------|----------|----------|----------|--------------------------|-----------------------------------------------|------------------------------------------------------------|---------|------|
| YPO3864  | 0.010814 | 0.172851 | -1.52592 | <i>rffE, wecB, nfrC</i>  | UDP-N-acetylglucosamine 2-epimerase           | Surface polysaccharides, lipopolysaccharides and antigens  | COG0381 | M    |
| yscI     | 0.002543 | 0.108361 | -1.52806 | <i>yscI, lcrO</i>        |                                               |                                                            |         |      |
| YPO1121  | 0.033334 | 0.247878 | -1.53634 | <i>tolQ</i>              | TolQ colicin import protein                   | Colicin-related functions                                  | COG0811 | U    |
| YPO0882  | 0.034979 | 0.25071  | -1.54141 |                          | Conserved hypothetical protein                | Unknown                                                    |         |      |
| YPO1092  | 0.040614 | 0.271993 | -1.55053 |                          | Putative DNA-binding prophage protein         | Phage-related functions and prophage                       | COG0582 | L    |
| YPO2574  | 0.000209 | 0.043857 | -1.55255 |                          | Putative membrane protein                     | Membranes, lipoproteins and porins                         | COG3477 | S    |
| YPO3366  | 0.022486 | 0.214259 | -1.55255 | <i>cysD</i>              | Sulfate adenyllyltransferase subunit 2        | Sulphur metabolism                                         | COG0175 | EH   |
| YPCD1.18 | 0.042411 | 0.277255 | -1.55488 |                          |                                               |                                                            |         |      |
| sycN     | 0.044007 | 0.281364 | -1.55846 | <i>sycN</i>              | Putative type III secretion protein           | T3SS                                                       |         |      |
| YPO1176  | 0.004128 | 0.12946  | -1.5608  | <i>pbpG</i>              | Penicillin-binding protein 7 precursor        | Murein sacculus and peptidoglycan                          | COG1686 | M    |
| YPO1706  | 0.005333 | 0.142328 | -1.56111 | <i>htpX</i>              | Putative heat shock protein                   | Adaptions and atypical conditions                          | COG0501 | O    |
| YPO3817  | 0.001561 | 0.09505  | -1.56236 |                          | Putative membrane protein                     | Membranes, lipoproteins and porins                         |         |      |
| YPO0332  | 0.021611 | 0.209044 | -1.56643 | <i>rhaS, rhaC2, b395</i> | L-rhamnose operon regulatory protein          | Broad regulatory functions                                 | COG2207 | K    |
| YPO2674  | 0.021611 | 0.209044 | -1.57318 |                          | Putative exported protein                     | Membranes, lipoproteins and porins                         |         |      |
| rffE     | 0.014095 | 0.184652 | -1.57507 | <i>rffE, wecB, nfrC</i>  | UDP-N-acetylglucosamine 2-epimerase           | Surface polysaccharides, lipopolysaccharides and antigens  |         |      |
| nusG     | 0.041153 | 0.273471 | -1.57586 | <i>nusG</i>              | Transcription antitermination protein         | RNA synthesis, RNA modification and DNA transcription      |         |      |
| YPO3661  | 0.010149 | 0.172851 | -1.58202 |                          | Putative membrane protein                     | Membranes, lipoproteins and porins                         | COG2717 | S    |
| feoA     | 0.035229 | 0.251721 | -1.58502 | <i>feoA</i>              | Hypothetical ferrous iron transport protein A | Unknown                                                    |         |      |
| YPO2897  | 0.006256 | 0.14978  | -1.58645 | <i>yfhP</i>              | Conserved hypothetical protein                | Unknown                                                    | COG1959 | K    |
| YPO3203  | 0.006947 | 0.153829 | -1.59472 | <i>pstS</i>              | Phosphate binding protein                     | Transport/binding Anions                                   | COG0226 | P    |
| YPO1373  | 0.041002 | 0.27301  | -1.59871 | <i>cydD, htrD</i>        | Transport ATP-binding protein                 | Transport/binding proteins                                 | COG1132 | V    |
| YPO3359  | 0.006679 | 0.15211  | -1.60015 |                          | Conserved hypothetical protein                | Unknown                                                    | COG0585 | S    |
| YPO0404  | 0.012181 | 0.175355 | -1.6093  |                          | PTS system, IIC component                     | Transport/binding Carbohydrates,organic acids and alcohols | COG1299 | G    |
| YPO3865  | 0.001574 | 0.09505  | -1.61268 | <i>wzzE, wzz, b3785</i>  | Putative lipopolysaccharide biosynthesis prot | Surface polysaccharides, lipopolysaccharides and antigens  |         |      |
| YPO3361  | 0.009099 | 0.167848 | -1.62743 | <i>ispD, b2747</i>       | 4-diphosphocytidyl-2C-methyl-D-erythritol s   | Central intermediary metabolism                            | COG1211 | I    |
| YPO2394  | 0.032455 | 0.247878 | -1.63673 | <i>lpp, mlpA</i>         | Major outer membrane lipoprotein              | Membranes, lipoproteins and porins                         | COG0840 | NT   |
| YPO3360  | 0.002958 | 0.115868 | -1.64856 | <i>ispF, mecS, b2746</i> | 2C-methyl-D-erythritol 2,4-cyclodiphosphate   | Central intermediary metabolism                            | COG0245 | I    |
| YPO1513  | 0.034617 | 0.249875 | -1.64955 | <i>yohK</i>              | Putative membrane protein                     | Membranes, lipoproteins and porins                         | COG1346 | M    |
| yscJ     | 1.9E-05  | 0.016001 | -1.65616 | <i>yscJ, ylpB</i>        |                                               |                                                            |         |      |
| YPO2671  | 0.018226 | 0.194763 | -1.66646 | <i>ureD</i>              | Urease accessory protein (pseudogene)         | Pathogenicity                                              |         |      |
| yscK     | 0.009874 | 0.172851 | -1.6713  | <i>yscK</i>              |                                               |                                                            |         |      |
| YPO3428  | 0.003217 | 0.11824  | -1.68371 | <i>guaC</i>              | GMP reductase                                 | Purine ribonucleotide biosynthesis                         | COG0516 | F    |
| yscS     | 0.021686 | 0.209163 | -1.68523 | <i>yscS</i>              |                                               |                                                            |         |      |
| yscT     | 0.024122 | 0.220678 | -1.68742 | <i>yscT</i>              |                                               |                                                            |         |      |
| yscL     | 0.013843 | 0.184497 | -1.69114 | <i>yscL</i>              |                                               |                                                            |         |      |
| YPO2895  | 0.017734 | 0.193113 | -1.69791 | <i>nifU,iscU/yfhN</i>    | NifU family protein                           | Unknown                                                    | COG0822 | C    |
| mtlA     | 0.002548 | 0.108361 | -1.69825 | <i>mtlA</i>              | PTS system, mannitol-specific IIABC compo     | Transport/binding Carbohydrates,organic acids and alcohols |         |      |
| pim      | 0.039241 | 0.265341 | -1.69825 | <i>pim</i>               |                                               |                                                            |         |      |
| YPO2894  | 0.007045 | 0.154422 | -1.70404 | <i>iscA/yfhF</i>         | Conserved hypothetical protein                | Unknown                                                    | COG0316 | S    |
| yscX     | 0.01144  | 0.172851 | -1.70557 | <i>yscX</i>              |                                               |                                                            |         |      |
| YPO3986  | 0.016639 | 0.193113 | -1.71292 | <i>cdh</i>               | CDP-diacylglycerol pyrophosphatase            | Fatty acid biosynthesis                                    | COG2134 | I    |
| YPO2703  | 0.019593 | 0.201649 | -1.71292 | <i>pcp</i>               | Putative pyrrolidone-carboxylate peptidase    | Degradation of Proteins, peptides and glycopeptides        | COG2039 | O    |
| YPCD1.73 | 0.049837 | 0.29892  | -1.71463 |                          |                                               |                                                            |         |      |
| YPO3363  | 0.016761 | 0.193113 | -1.72823 | <i>ygbE</i>              | Putative membrane protein                     | Membranes, lipoproteins and porins                         | COG0477 | GEPR |
| YPO2893  | 0.009042 | 0.167713 | -1.73169 |                          | Chaperone protein HscB                        |                                                            | COG1076 | O    |
| lcrF     | 0.014179 | 0.184652 | -1.73343 | -1.53 <i>lcrF, virF</i>  |                                               |                                                            |         |      |
| YPO2896  | 0.007676 | 0.156319 | -1.7395  | <i>iscS, nijS, yfhO</i>  | Putative aminotransferase                     | Unknown                                                    | COG1104 | E    |

|         |          |          |          |                             |                                                   |                                                             |            |
|---------|----------|----------|----------|-----------------------------|---------------------------------------------------|-------------------------------------------------------------|------------|
| YPO2267 | 0.015248 | 0.191354 | -1.75786 |                             | LysR-family transcriptional regulatory protein    | Broad regulatory functions                                  |            |
| yopE    | 0.015787 | 0.192194 | -1.76315 | <i>yopE</i>                 | Putative outer membrane virulence protein         | YOP                                                         |            |
| YPO1435 | 0.049042 | 0.298303 | -1.7923  | <i>ompA, tolG, tut, con</i> | Putative outer membrane porin A protein           | Cell envelop                                                | COG2885 M  |
| yscY    | 0.011478 | 0.172851 | -1.79876 | <i>yscY</i>                 |                                                   |                                                             |            |
| YPO0326 | 0.019353 | 0.200985 | -1.80381 |                             | Conserved hypothetical protein                    | Unknown                                                     | COG3254 S  |
| YPO2390 | 0.000345 | 0.053827 | -1.80832 | <i>cfa, cdfA</i>            | Cyclopropane-fatty-acyl-phospholipid synthase     | Fatty acid biosynthesis                                     | COG2230 M  |
| YPO1302 | 0.016561 | 0.193113 | -1.81176 | <i>pscF</i>                 | putative membrane protein                         | Membranes, lipoproteins and porins                          |            |
| yscM    | 0.011316 | 0.172851 | -1.81811 | <i>yscM, lcrQ</i>           |                                                   |                                                             |            |
| YPO3388 | 0.001855 | 0.09505  | -1.82851 | <i>yadQ</i>                 | Putative chloride channel protein                 | Transport/binding Anions                                    | COG0038 P  |
| YPO4113 | 0.003289 | 0.11824  | -1.8504  | <i>phoU, nmpA</i>           | Putative phosphate transport system protein       | Central intermediary metabolism                             | COG0704 P  |
| yscQ    | 0.013859 | 0.184497 | -1.87367 | <i>yscQ</i>                 |                                                   |                                                             |            |
| YPO4116 | 0.007196 | 0.15491  | -1.87573 | <i>pstC, phoW</i>           | Putative phosphate transport system permease      | Transport/binding proteins                                  | COG0573 P  |
| YPO4085 | 0.027838 | 0.236717 | -1.9058  | <i>ibpA, hslT, htpN</i>     | Heat shock protein                                | Adaptions and atypical conditions                           | COG0071 O  |
| YPO4115 | 0.002792 | 0.115144 | -1.90961 | <i>pstA, phoT</i>           | Putative phosphate transport system permease      | Transport/binding proteins                                  | COG0581 P  |
| lcrD    | 0.027298 | 0.236717 | -1.92418 | <i>lcrD, yscV</i>           |                                                   |                                                             |            |
| YPO3369 | 0.017367 | 0.193113 | -1.92765 |                             | Conserved hypothetical protein                    | Unknown                                                     | COG1598 S  |
| yopT    | 0.00017  | 0.041071 | -1.9288  | -2.81 <i>yopT</i>           | Putative cytotoxic effector protein               |                                                             |            |
| YPO1222 | 0.009336 | 0.169436 | -1.94741 | <i>ompC, meoA, par</i>      | Outer membrane protein C, porin                   | Cell envelop                                                | COG3203 M  |
| YPO3137 | 0.015617 | 0.192194 | -1.95972 |                             | Conserved hypothetical protein                    | Unknown                                                     |            |
| cafIA   | 0.000364 | 0.053827 | -1.96148 | <i>cafIA</i>                | Putative F1 capsule anchoring protein, cafIA      |                                                             |            |
| yscO    | 0.025004 | 0.225942 | -1.96737 | <i>yscO</i>                 |                                                   |                                                             |            |
| YPO1855 | 0.028234 | 0.23769  | -2.00471 |                             | Putative exported protein                         | Membranes, lipoproteins and porins                          | COG2822 P  |
| YPO1856 | 0.035986 | 0.25256  | -2.00993 |                             | Conserved hypothetical protein                    | Unknown                                                     | COG2837 P  |
| ompC    | 0.014223 | 0.184652 | -2.01456 | <i>ompC, meoA, par</i>      | Outer membrane protein C, porin                   | Cell envelop                                                |            |
| YPO4114 | 0.003315 | 0.11824  | -2.02466 | <i>pstB, phoT</i>           | Putative phosphate transport ATP-binding protein  | Transport/binding proteins                                  | COG1117 P  |
| yscR    | 0.034433 | 0.249875 | -2.04031 | <i>yscR</i>                 |                                                   |                                                             |            |
| bfr     | 0.007399 | 0.156319 | -2.04971 | <i>bfr</i>                  | Bacterioferritin                                  | Iron uptake                                                 |            |
| pstB    | 0.012715 | 0.1781   | -2.05053 | <i>pstB</i>                 | Putative phosphate transport ATP-binding protein  | Transport/binding proteins                                  |            |
| YPO3367 | 0.000534 | 0.072102 | -2.06618 | <i>cysG</i>                 | Siroheme synthase                                 | Heme and porphyrin Biosynthesis                             | COG0007 H  |
| yscP    | 0.011984 | 0.175131 | -2.06721 | <i>yscP</i>                 |                                                   |                                                             |            |
| YPO3387 | 0.001084 | 0.087108 | -2.08882 |                             | Conserved hypothetical protein                    | Unknown                                                     | COG0316 S  |
| YPO1608 | 2.62E-05 | 0.017707 | -2.11573 | <i>ptsG, glcA, umG</i>      | PTS system, glucose-specific IIBC component       | Transport/binding Carbohydrates, organic acids and alcohols | COG1263 G  |
| YPO3013 | 0.00491  | 0.139505 | -2.1533  | <i>cysW</i>                 | Sulfate transport system permease protein Cy      | Transport/binding Anions                                    | COG0555 O  |
| yscN    | 0.024068 | 0.220678 | -2.24431 | <i>yscN</i>                 |                                                   |                                                             |            |
| YPO3138 | 0.004112 | 0.12946  | -2.26778 | <i>ymoA</i>                 | Modulating protein YmoA (histone-like protein)    | Broad regulatory functions                                  | COG0326 O  |
| YPO1305 | 0.019409 | 0.200985 | -2.26959 | <i>psaC</i>                 | Outer membrane usher protein PsaC precursor       | Surface structures                                          | COG3188 NU |
| YPO0445 | 0.006345 | 0.150831 | -2.29011 |                             | Conserved hypothetical protein                    | Unknown                                                     | COG3177 S  |
| YPO1854 | 0.007095 | 0.154523 | -2.35396 |                             | Putative membrane protein                         | Membranes, lipoproteins and porins                          | COG0672 P  |
| YPO1847 | 0.017714 | 0.193113 | -2.42759 | <i>yecS</i>                 | Putative amino-acid ABC transporter (permease)    | Transport/binding Amino acids and amines                    | COG0765 E  |
| YPO3321 | 0.001779 | 0.09505  | -2.48035 | <i>cybB</i>                 | Probable cytochrome B561                          | Electron transport                                          | COG3038 C  |
| YPO1754 | 0.001748 | 0.09505  | -2.49378 | <i>yebN</i>                 | Putative membrane protein                         | Membranes, lipoproteins and porins                          | COG1971 S  |
| ypkA    | 0.003194 | 0.11824  | -2.51582 | <i>ypkA</i>                 |                                                   |                                                             |            |
| YPO1848 | 0.04297  | 0.277312 | -2.52616 | <i>yecC</i>                 | Putative amino-acid ABC transporter (ATP-binding) | Transport/binding Amino acids and amines                    | COG1126 E  |
| YPO1992 | 0.008309 | 0.162789 | -2.52717 |                             | Conserved hypothetical protein                    | Unknown                                                     | COG0500 QR |
| yopP    | 0.001417 | 0.090259 | -2.65276 | <i>yopP, yopJ</i>           | Putative targeted effector protein                | YOP                                                         |            |
| YPO1301 | 0.006181 | 0.149538 | -2.71014 | -3.8 <i>psaE</i>            | Putative regulatory protein                       | Broad regulatory functions                                  | COG0745 TK |
| YPO3320 | 0.000108 | 0.041071 | -2.71991 | <i>cybC</i>                 | Putative cytochrome B562                          | Electron transport                                          |            |

|             |          |          |          |             |                                               |                                          |             |
|-------------|----------|----------|----------|-------------|-----------------------------------------------|------------------------------------------|-------------|
| YPO4064     | 0.00064  | 0.076151 | -3.045   |             | Hypothetical protein                          | Unknown                                  |             |
| <i>yscB</i> | 0.010442 | 0.172851 | -3.2117  | <i>yscB</i> | A                                             |                                          |             |
| <i>sycE</i> | 0.000972 | 0.084194 | -3.2792  | <i>sycE</i> | Putative yopE chaperone                       |                                          |             |
| YPO1995     | 0.030055 | 0.245148 | -3.38008 |             | Hypothetical protein                          | Unknown                                  |             |
| <i>yscC</i> | 0.007625 | 0.156319 | -3.45838 | <i>yscC</i> |                                               |                                          |             |
| YPO1994     | 0.018029 | 0.193833 | -3.60853 |             | Hypothetical protein                          | Unknown                                  |             |
| YPO1649     | 0.000876 | 0.083832 | -3.64881 |             | Conserved hypothetical protein                | Unknown                                  | COG1566 V   |
| YPO4110     | 0.029733 | 0.244815 | -4.17202 | <i>gltJ</i> | ABC transporter permease                      | Transport/binding proteins               | COG0765 E   |
| YPO4109     | 0.029303 | 0.24245  | -4.20175 |             | Putative amino acid transport system permease | Transport/binding Amino acids and amines | COG0765 E   |
| YPO1993     | 0.000111 | 0.041071 | -7.47153 |             | Putative dehydrogenase                        | Unknown                                  | COG1028 IQR |

\* FC = Fold Change
