# Supplementary material
Source: PubMed Central journal article supplement (PMC3811820)
Supplement: IAI.00880-13_zii999090360so2.pdf [file IAI.00880-13_zii999090360so2.pdf]

Table S2. Significant differentially expressed genes ( $p < 0.05$ ;  $FC^* > 1.5$ ): R88 vs ISM1980 (R88  $\Delta luxS::Kan$ ), 37°C.

| ID       | <i>p</i> value | <i>q</i> value | FC       | qRT-PCR | Gene                    | Gene function                                           | Process                                                    | COG     | COG function categories |
|----------|----------------|----------------|----------|---------|-------------------------|---------------------------------------------------------|------------------------------------------------------------|---------|-------------------------|
| YPO1507  | 0.016358457    | 0.035390695    | 13.3058  |         | <i>mgIB</i>             | Galactose-binding protein                               | Transport/binding Carbohydrates,organic acids and alcohols | COG1879 | G                       |
| YPO3300  | 1.25979E-06    | 0.000752186    | 12.78535 |         | <i>luxS</i>             | Autoinducer-2 production protein                        | AI-2                                                       | COG1854 | T                       |
| YPO1137  | 0.014673728    | 0.034956394    | 8.774063 |         | <i>galK</i> , <i>gc</i> | Galactokinase                                           | Galactose operon                                           | COG0153 | G                       |
| YPO3023  | 0.015798625    | 0.035091878    | 8.216136 |         |                         | Conserved hypothetical protein                          | Unknown                                                    | COG3010 | G                       |
| YPO3786  | 0.008263472    | 0.032332443    | 7.70986  |         | <i>udp</i>              | Uridine phosphorylase                                   | Salvage of nucleosides and nucleotides                     | COG2820 | F                       |
| YPO0408  | 0.008112265    | 0.032332443    | 7.49323  |         | <i>lsrF</i>             | Putative aldolase                                       | Degradation of carbon compounds                            | COG1830 | G                       |
| YPO3279  | 0.008275862    | 0.032332443    | 7.438729 | 6.9     | <i>yfiA</i>             | Putative sigma 54 modulation protein                    | Broad regulatory functions                                 | COG1544 | J                       |
| YPO0409  | 0.012431201    | 0.034349747    | 7.366185 |         | <i>lsrB</i>             | AI-2 receptor, periplasmic protein                      | AI-2                                                       | COG1879 | G                       |
| YPO1858  | 0.007158411    | 0.031529203    | 6.805969 |         |                         | Putative exported protein                               | Membranes, lipoproteins and porins                         | COG3055 | S                       |
| YPO0407  | 0.006429163    | 0.030434909    | 6.738922 |         | <i>lsrG</i>             | Cleavage of P-DPD cleavage producing 2 phosphoglycoli   | AI-2                                                       | COG1359 | S                       |
| YPO3024  | 0.01101479     | 0.03336898     | 6.505838 |         | <i>nanA</i> , <i>n</i>  | Probable N-acetylneuraminase lyase                      | Surface structures                                         | COG0329 | EM                      |
| YPO1139  | 0.014157285    | 0.034834517    | 6.486999 |         | <i>galE</i> , <i>gc</i> | UDP-glucose 4-epimerase                                 | Galactose operon                                           | COG1087 | M                       |
| YPO1508  | 0.020289444    | 0.037798026    | 6.470155 |         | <i>mgIA</i>             | Galactoside transport ATP-binding protein               | Transport/binding Carbohydrates,organic acids and alcohols | COG1129 | G                       |
| YPO1423a | 0.002674344    | 0.022752142    | 6.288358 |         | <i>rmf</i>              | Putative ribosome modulation factor                     | Ribosome maturation and modification                       | COG3130 | J                       |
| YPO1138  | 0.020051       | 0.037744385    | 6.243869 |         | <i>galT</i> , <i>ga</i> | Galactose-1-phosphate uridylyltransferase               | Galactose operon                                           | COG1085 | C                       |
| YPO3020  | 0.028246324    | 0.040733399    | 5.204377 |         |                         | Putative sugar kinase                                   | Unknown                                                    | COG1940 | KG                      |
| YPO2774  | 0.011188172    | 0.033373987    | 5.130484 |         | <i>hisJ</i>             | Histidine-binding periplasmic protein                   | Transport/binding Amino acids and amines                   | COG0834 | ET                      |
| YPO2012  | 0.013171971    | 0.034490359    | 4.941159 |         |                         | Putative membrane protein                               | Membranes, lipoproteins and porins                         |         |                         |
| YPO3714  | 0.004199769    | 0.026949058    | 4.910128 | 5       | <i>malE</i>             | Maltose-binding periplasmic protein precursor           | Maltose operon                                             | COG2182 | G                       |
| YPO3016  | 0.027526909    | 0.040446181    | 4.890038 |         | <i>nanT</i>             | Putative sugar transporter                              | Transport/binding Carbohydrates,organic acids and alcohols | COG0477 | GEPR                    |
| YPO2595  | 0.014240365    | 0.034834517    | 4.885639 |         | <i>cspE</i>             | Putative cold shock protein                             | Adaptions and atypical conditions                          | COG1278 | K                       |
| YPO0439  | 0.004684303    | 0.027745502    | 4.880267 | 2       | <i>deoB</i> , <i>d</i>  | Phosphopentomutase                                      | Salvage of nucleosides and nucleotides                     | COG1015 | G                       |
| YPO3767  | 0.023681279    | 0.039017462    | 4.729881 |         | <i>fadA</i> , <i>ol</i> | 3-ketoacyl-CoA thiolase                                 | Degradation of small molecule                              | COG0183 | I                       |
| YPO3019  | 0.02398355     | 0.039017462    | 4.642254 |         |                         | Conserved hypothetical protein                          | Unknown                                                    | COG2731 | G                       |
| YPO0149  | 0.025901041    | 0.039776249    | 4.54442  |         |                         | Putative membrane protein                               | Membranes, lipoproteins and porins                         |         |                         |
| YPO3766  | 0.033655827    | 0.044043591    | 4.523111 |         | <i>fadB</i> , <i>ol</i> | Fatty acid oxidation complex alpha subunit              | Degradation of small molecule                              | COG1250 | I                       |
| YPO0410  | 0.04830817     | 0.048944781    | 4.496503 |         | <i>lsrD</i>             | Putative ABC transporter permease protein               | AI-2                                                       | COG1172 | G                       |
| YPO0436  | 0.014120499    | 0.034834517    | 4.486173 |         | <i>deoC</i> , <i>d</i>  | Deoxyribose-phosphate aldolase                          | Serine family biosynthesis                                 | COG0274 | F                       |
| YPO0845  | 3.35315E-05    | 0.007931073    | 4.390311 |         |                         | ThiJ,PfpI-family thiamine biogenesis protein            | Thiamine Biosynthesis                                      | COG0693 | R                       |
| YPO0623  | 0.008284936    | 0.032332443    | 4.202166 |         |                         | Putative aminotransferase                               | Unknown                                                    | COG0436 | E                       |
| YPO0624  | 0.008402765    | 0.032332443    | 4.172853 |         |                         | Putative membrane protein                               | Membranes, lipoproteins and porins                         | COG1757 | C                       |
| YPO3788  | 0.00124827     | 0.019738662    | 4.100463 |         | <i>metE</i>             | 5-methyltetrahydropteroyltryglutamate--homocyst eine me | Aspartate family biosynthesis                              | COG0620 | E                       |
| YPO0832  | 0.00230563     | 0.021602417    | 4.096775 |         | <i>agaZ</i>             | Putative tagatose 6-phosphate kinase                    | Degradation of carbon compounds                            |         |                         |
| YPO0844  | 0.00115403     | 0.019298639    | 4.084094 |         | <i>agaY</i> , <i>kl</i> | Putative aldolase                                       | Degradation of carbon compounds                            | COG0191 | G                       |
| YPO1303  | 0.000740891    | 0.017718588    | 4.028524 | 5.67    | <i>psaA</i>             | pH 6 antigen precursor (antigen 4) (adhesin)            | Surface polysaccharides, lipopolysaccharides and antigens  |         |                         |
| YPO3725  | 0.000429881    | 0.01718606     | 3.88802  | 6.34    | <i>aceA</i> , <i>ic</i> | Isocitrate lyase                                        | Glyoxylate bypass                                          | COG2224 | C                       |
| YPO1509  | 0.043332818    | 0.047568566    | 3.79468  |         | <i>mgIC</i>             | Galactoside permease                                    | Transport/binding Carbohydrates,organic acids and alcohols | COG1172 | G                       |
| YPO3200  | 0.005731756    | 0.029973848    | 3.787477 |         | <i>malZ</i>             | Putative maltodextrin glucosidase                       | Maltose operon                                             | COG0366 | G                       |
| YPO0414  | 0.010939991    | 0.03336898     | 3.727359 |         | <i>lsrR</i>             | Repressor binds specifically to the P-DPD(pseudogene)   | AI-2                                                       |         |                         |
| YPO3244  | 0.00528406     | 0.029198545    | 3.720284 |         | <i>yafH</i>             | Probable acyl-CoA dehydrogenase                         | Degradation of small molecule                              | COG1960 | I                       |
| YPO3726  | 0.000285712    | 0.016712285    | 3.693225 |         | <i>aceB</i> , <i>m</i>  | Malate synthase A                                       | Glyoxylate bypass                                          | COG2225 | C                       |
| YPO3681  | 0.000126442    | 0.012919226    | 3.67407  |         |                         | Putative insecticidal toxin                             | Pathogenicity                                              | COG1196 | D                       |
| YPO1645  | 0.003878347    | 0.026026647    | 3.670398 |         |                         | Conserved hypothetical protein                          | Unknown                                                    | COG0702 | MG                      |
| YPO3711  | 0.013585818    | 0.034748073    | 3.625166 |         | <i>lamB</i> , <i>m</i>  | Maltoporin                                              | Maltose operon                                             |         |                         |
| YPO2444  | 0.013016153    | 0.034490359    | 3.577986 |         |                         | Conserved hypothetical protein                          | Unknown                                                    | COG3001 | G                       |
| YPO0907  | 0.014709352    | 0.034956394    | 3.469117 |         | <i>gcvT</i>             | Aminomethyltransferase                                  | Degradation of amino acids                                 | COG0404 | E                       |

|          |             |             |          |  |                                                                       |                                                                |         |     |
|----------|-------------|-------------|----------|--|-----------------------------------------------------------------------|----------------------------------------------------------------|---------|-----|
| YPO0625  | 0.014832857 | 0.034956394 | 3.370294 |  | Hypothetical protein                                                  | Unknown                                                        |         |     |
| YPO0906  | 0.01094286  | 0.03336898  | 3.361207 |  | <i>gcsH</i> Glycine cleavage system H protein                         | glycine                                                        | COG0509 | E   |
| YPO1512  | 0.008339601 | 0.032332443 | 3.346784 |  | <i>cds</i> Cytidine deaminase                                         | Salvage of nucleosides and nucleotides                         | COG0295 | F   |
| YPO2264  | 0.00069757  | 0.017718588 | 3.30521  |  | <i>fumC</i> Fumarate hydratase, class II                              | Tricarboxylic acid cycle                                       | COG0114 | C   |
| malF     | 0.020120924 | 0.037744385 | 3.234906 |  | <i>malF</i> Maltose transport system permease protein MalF            | Maltose operon                                                 |         |     |
| YPO0337  | 0.034443007 | 0.044527354 | 3.234906 |  | Putative exported protein                                             | Membranes, lipoproteins and porins                             |         |     |
| YPO3724  | 0.001639004 | 0.02045638  | 3.186426 |  | <i>aceK</i> Isocitrate dehydrogenase kinase.phosphatase               | Glyoxylate bypass                                              |         |     |
| YPO3527  | 0.002065279 | 0.021431731 | 3.045606 |  | Conserved hypothetical protein                                        | Unknown                                                        |         |     |
| YPO1321  | 0.04630615  | 0.048690731 | 3.042562 |  | <i>sdaC, d</i> Serine transporter                                     | Transport/binding Amino acids and amines                       | COG0814 | E   |
| YPO0252  | 0.010708534 | 0.033239226 | 3.02769  |  | Putative membrane protein                                             | Membranes, lipoproteins and porins                             | COG3162 | S   |
| YPO2666  | 0.00694063  | 0.031357403 | 3.007172 |  | <i>ureB, ye</i> Urease beta subunit                                   | Pathogenicity                                                  | COG0832 | E   |
| YPO0253  | 0.008612943 | 0.032332443 | 3.001463 |  | <i>acs</i> Acetyl-coenzyme A synthetase                               | Degradation of carbon compounds                                | COG0365 | I   |
| YPO0412  | 0.028199496 | 0.040733399 | 2.994568 |  | <i>lsrA</i> Putative ABC transporter ATP-binding protein              | AI-2                                                           | COG1129 | G   |
| YPO4080  | 0.016077332 | 0.035297758 | 2.985896 |  | <i>malS</i> Alpha-amylase protein                                     | Maltose operon                                                 | COG0366 | G   |
| YPO1383  | 0.001357595 | 0.019849387 | 2.919756 |  | <i>pflB, pfl</i> Formate acetyltransferase 1                          | Anaerobic respiration                                          | COG1882 | C   |
| YPO0821  | 0.00807808  | 0.032332443 | 2.909555 |  | Hypothetical protein                                                  | Unknown                                                        | COG0086 | K   |
| YPO0833  | 0.011996999 | 0.034195991 | 2.870252 |  | Putative phosphosugar isomerase                                       | Degradation of carbon compounds                                | COG2222 | M   |
| YPO2744  | 0.022810804 | 0.039017462 | 2.85908  |  | <i>fadL, ttr</i> Putative long-chain fatty acid transport protein     | Transport/binding Carbohydrates,organic acids and alcohols     | COG2067 | I   |
| YPO2665  | 0.007183757 | 0.031529203 | 2.826955 |  | <i>ureA, ye</i> Urease gamma subunit                                  | Pathogenicity                                                  | COG0831 | E   |
| YPO3970  | 0.020688739 | 0.03822026  | 2.824129 |  | <i>uspA</i> Universal stress protein A                                | Adaptions and atypical conditions                              | COG0589 | T   |
| YPO3687  | 0.005184109 | 0.028811426 | 2.819614 |  | Putative succinate-semialdehyde dehydrogenase (pseudog                | Central intermediary metabolism                                |         |     |
| YPO0325  | 0.001907325 | 0.021336704 | 2.797707 |  | <i>ssb, exr</i> Single-strand binding protein                         | DNA replication, restriction/modification, recombination and r | COG0629 | L   |
| YPO2675  | 0.002201657 | 0.021479969 | 2.795469 |  | Putative potassium channel protein                                    | Transport/binding Cations                                      | COG1226 | P   |
| YPO2577  | 0.018247956 | 0.03641551  | 2.789605 |  | Putative aldehyde dehydrogenase                                       | Degradation of carbon compounds                                | COG1012 | C   |
| YPO0437  | 0.038460339 | 0.045450147 | 2.777635 |  | <i>deoA, tq</i> Thymidine phosphorylase (pseudogene)                  | Salvage of nucleosides and nucleotides                         |         |     |
| YPO1235  | 0.040787512 | 0.046904392 | 2.761848 |  | Conserved hypothetical protein                                        | Unknown                                                        | COG3395 | S   |
| YPO0440  | 0.023796246 | 0.039017462 | 2.738472 |  | <i>deoD, p</i> Purine nucleoside phosphorylase                        | Salvage of nucleosides and nucleotides                         | COG0813 | F   |
| YPO3319  | 0.016959696 | 0.035522094 | 2.704724 |  | <i>katY</i> Catalase-peroxidase                                       | Oxidative stress                                               | COG0376 | P   |
| YPMT1.72 | 0.008310071 | 0.032332443 | 2.688276 |  |                                                                       |                                                                |         |     |
| YPO0584  | 0.041640127 | 0.047031976 | 2.678615 |  | Putative symporter protein                                            | Transport/binding proteins                                     | COG3633 | E   |
| YPO2255  | 0.007688786 | 0.03221144  | 2.652493 |  | <i>araF</i> L-arabinose-binding periplasmic protein precursor         | Arabinose operon                                               | COG1879 | G   |
| YPO0834  | 0.041899666 | 0.047124761 | 2.650902 |  | <i>manX</i> Putative PTS transport protein                            | Transport/binding Carbohydrates,organic acids and alcohols     | COG3444 | G   |
| YPO2074  | 0.013479909 | 0.034748073 | 2.623476 |  | <i>fadD</i> Long-chain-fatty-acid-CoA ligase                          | Degradation of small molecule                                  | COG0318 | IQ  |
| malG     | 0.023319444 | 0.039017462 | 2.621116 |  | <i>malG</i> Maltose transport system permease protein MalG            | Maltose operon                                                 |         |     |
| YPO3716  | 0.002228149 | 0.021479969 | 2.595295 |  | <i>malG</i> Maltose transport system permease protein MalG            | Maltose operon                                                 | COG0395 | G   |
| YPO4003  | 0.026865588 | 0.040256329 | 2.592701 |  | <i>dppA</i> Periplasmic dipeptide transport protein                   | Transport/binding proteins                                     | COG0747 | E   |
| agaY     | 0.000111683 | 0.012514977 | 2.587003 |  | <i>agaY, kl</i> Putative aldolase                                     | Degradation of carbon compounds                                |         |     |
| YPO1115  | 0.001832234 | 0.021162725 | 2.572813 |  | <i>sucC, b</i> Succinyl-CoA synthetase beta chain                     | Tricarboxylic acid cycle                                       | COG0045 | C   |
| YPO3034  | 0.005812179 | 0.030095594 | 2.558958 |  | <i>maeB</i> NADP-dependent malic enzyme                               | Gluconeogenesis                                                | COG0281 | C   |
| YPO1041  | 0.007236625 | 0.031553633 | 2.546449 |  | <i>dapD</i> 2,3,4,5-tetrahydropyridine-2-carboxylate N-succinyltransf | Aspartate family biosynthesis                                  | COG2171 | E   |
| YPO1207  | 0.001183719 | 0.019298639 | 2.539583 |  | <i>katA</i> Catalase                                                  | Oxidative stress                                               | COG0753 | P   |
| YPO0831  | 0.030408591 | 0.041986505 | 2.532482 |  | DeoR-family regulatory protein                                        | Broad regulatory functions                                     | COG1349 | KG  |
| YPO2615  | 0.018153749 | 0.03641551  | 2.508538 |  | <i>glnH</i> Putative amino acid-binding protein precursor             | Transport/binding Amino acids and amines                       | COG0834 | ET  |
| YPO3199  | 0.045444242 | 0.048392859 | 2.485565 |  | Probable short-chain dehydrogenase                                    | Unknown                                                        | COG1028 | IQR |
| sucD     | 0.024191028 | 0.039097379 | 2.442202 |  | <i>sucD</i> Succinyl-CoA synthetase alpha chain                       | Tricarboxylic acid cycle                                       |         |     |
| YPO3648  | 0.013067495 | 0.034490359 | 2.43781  |  | Putative 2-hydroxy-3-oxopropionate reductase                          | Degradation of carbon compounds                                | COG2084 | I   |
| YPO0823  | 0.011525788 | 0.03357332  | 2.40488  |  | <i>yapM</i> Autotransporter                                           | Membranes, lipoproteins and porins                             | COG2931 | Q   |
| YPO3649  | 0.008994435 | 0.032612957 | 2.401035 |  | Putative gamma carboxymuconolactone decarboxylase                     | Degradation of small molecule                                  | COG0599 | S   |
| YPO1112  | 0.007388566 | 0.031595575 | 2.396238 |  | <i>sdhB</i> Succinate dehydrogenase iron-sulfur protein               | Tricarboxylic acid cycle                                       | COG0479 | C   |
| YPO1116  | 0.005890983 | 0.030095594 | 2.394561 |  | <i>sucD</i> Succinyl-CoA synthetase alpha chain                       | Tricarboxylic acid cycle                                       | COG0074 | C   |
| YPO0626  | 0.004878701 | 0.027776406 | 2.390494 |  | Conserved hypothetical protein                                        | Unknown                                                        | COG2964 | S   |

|             |             |             |          |                                                                    |                                                                |         |      |
|-------------|-------------|-------------|----------|--------------------------------------------------------------------|----------------------------------------------------------------|---------|------|
| YPO1996     | 0.007785382 | 0.032332443 | 2.388343 | Hypothetical protein                                               | Unknown                                                        | COG2812 | L    |
| YPO2667     | 0.014633648 | 0.034956394 | 2.379761 | <i>ureC</i> , $\gamma$ Urease alpha subunit                        | Pathogenicity                                                  | COG0804 | E    |
| YPO1040     | 0.031079325 | 0.042303438 | 2.363633 | Conserved hypothetical protein                                     | Unknown                                                        | COG1196 | D    |
| YPO0060     | 0.003833637 | 0.026026647 | 2.362688 | <i>tdh</i> Threonine 3-dehydrogenase                               | Degradation of amino acids                                     | COG1063 | ER   |
| YPO0415     | 0.02471714  | 0.039115715 | 2.35514  | <i>lsrK</i> Kinase phosphorylates carbon-5 of the open form of DPD | AI-2                                                           | COG1070 | G    |
| YPO0822     | 0.02736267  | 0.040338726 | 2.346911 | Putative exported protein                                          | Membranes, lipoproteins and porins                             |         |      |
| YPO3715     | 0.02189188  | 0.038668179 | 2.344096 | <i>malF</i> Maltose transport system permease protein MalF         | Maltose operon                                                 | COG1175 | G    |
| YPO1114     | 0.002128869 | 0.021479969 | 2.334972 | <i>sucB</i> Dihydrolipoamide succinyltransferase component of 2-ox | Tricarboxylic acid cycle                                       | COG0508 | C    |
| YPO1358     | 0.000834542 | 0.019104257 | 2.326581 | <i>poxB</i> Pyruvate dehydrogenase [cytochrome]                    | Pyruvate dehydrogenase                                         | COG0028 | EH   |
| YPO2386     | 1.33734E-05 | 0.004440893 | 2.317757 | <i>sodB</i> Superoxide dismutase [Fe]                              | Detoxification                                                 | COG0605 | P    |
| YPO3785     | 0.004625876 | 0.027612645 | 2.300209 | Conserved hypothetical protein                                     | Unknown                                                        | COG2365 | T    |
| YPO1779     | 0.016680859 | 0.035480778 | 2.29745  | Putative exported protein                                          | Membranes, lipoproteins and porins                             |         |      |
| YPO1304     | 0.000991296 | 0.019298639 | 2.280056 | <i>psaB</i> Chaperone protein PsaB precursor                       | Chaperones, chaperonins, heat shock                            | COG3121 | NU   |
| YPO0324     | 0.000439996 | 0.01718606  | 2.263246 | <i>uvrA</i> , <i>diX</i> Excinuclease ABC subunit A                | DNA replication, restriction/modification, recombination and r | COG0178 | L    |
| YPO1995     | 0.007077255 | 0.031503233 | 2.254662 | Hypothetical protein                                               | Unknown                                                        |         |      |
| YPO1113     | 0.021693559 | 0.038632787 | 2.244988 | <i>sucA</i> 2-oxoglutarate dehydrogenase E1 component              | Tricarboxylic acid cycle                                       | COG0567 | C    |
| YPO0905     | 0.047674435 | 0.048838565 | 2.229105 | <i>gcvP</i> Glycine dehydrogenase                                  | glycine                                                        | COG1003 | E    |
| YPO1236     | 0.023535042 | 0.039017462 | 2.225096 | Putative class II aldolase-family protein                          | Unknown                                                        | COG0235 | G    |
| YPO3650     | 0.031698639 | 0.042659127 | 2.170158 | Putative metabolite transport protein                              | Transport/binding proteins                                     | COG0477 | GEPR |
| YPO3647     | 0.033520717 | 0.043953387 | 2.169507 | Conserved hypothetical protein                                     | Unknown                                                        | COG0491 | R    |
| YPO0836     | 0.008456176 | 0.032332443 | 2.157176 | Putative PTS permease protein                                      | Transport/binding Carbohydrates,organic acids and alcohols     | COG0477 | GEPR |
| <i>tdh</i>  | 0.028694632 | 0.040972496 | 2.154589 | Threonine 3-dehydrogenase                                          | Degradation of amino acids                                     |         |      |
| YPO3712     | 0.023816915 | 0.039017462 | 2.149854 | <i>malK</i> Maltose,maltodextrin transport ATP-binding protein     | Maltose operon                                                 | COG1130 | G    |
| YPO3070     | 0.012542289 | 0.034349747 | 2.137635 | <i>yfgD</i> Putative arsenate reductase                            | Drug/analogue sensitivity                                      | COG1393 | P    |
| YPO1108     | 0.005107508 | 0.028504972 | 2.128888 | <i>gltA</i> , <i>glt</i> Citrate synthase GltA                     | Tricarboxylic acid cycle                                       | COG0372 | C    |
| YPO2905     | 0.002212996 | 0.021479969 | 2.126123 | <i>ail</i> Attachment invasion locus protein                       | Ail                                                            | COG3637 | M    |
| YPO2301     | 0.02186698  | 0.038668179 | 2.119542 | Putative stress protein                                            | Unknown                                                        | COG0589 | T    |
| YPO0411     | 0.021563768 | 0.038632787 | 2.114673 | <i>lsrC</i> Putative ABC transporter permease protein              | AI-2                                                           | COG1172 | G    |
| YPO2854     | 0.024984009 | 0.039180251 | 2.107916 | Conserved hypothetical protein                                     | Unknown                                                        | COG3422 | S    |
| YPO0059     | 0.009602608 | 0.032670333 | 2.073629 | <i>kbl</i> Amino-3-ketobutyrate coenzyme A ligase                  | Fatty acid biosynthesis                                        | COG0156 | H    |
| YPO1111     | 0.023901309 | 0.039017462 | 2.063905 | <i>sdhA</i> Succinate dehydrogenase flavoprotein subunit           | Tricarboxylic acid cycle                                       | COG1053 | C    |
| YPO0570     | 0.002476038 | 0.022045547 | 2.046846 | <i>yqjD</i> Putative membrane protein                              | Membranes, lipoproteins and porins                             | COG1196 | D    |
| YPO1354     | 0.00993294  | 0.032901973 | 2.046232 | Putative lipoprotein                                               | Membranes, lipoproteins and porins                             |         |      |
| YPO3583     | 0.008651768 | 0.032332443 | 2.04051  | <i>yhbH</i> Probable sigma (54) modulation protein (pseudogene)    | RNA synthesis, RNA modification and DNA transcription          |         |      |
| <i>acnA</i> | 0.000473518 | 0.01718606  | 2.033178 | <i>acnA</i> , <i>ac</i> Aconitate hydratase 1                      | Tricarboxylic acid cycle                                       |         |      |
| YPO1353     | 0.001509315 | 0.019849387 | 2.026479 | Putative chorismate mutase                                         | Central intermediary metabolism                                | COG1605 | E    |
| YPO0159     | 0.014354938 | 0.034956394 | 2.023037 | <i>nirC</i> Putative nitrite transporter                           | Transport/binding Anions                                       | COG2116 | P    |
| YPO0676     | 0.015658982 | 0.034956394 | 2.020813 | Putative aldo,keto reductase family protein                        | Unknown                                                        | COG0656 | R    |
| YPO1778     | 0.016045875 | 0.035287018 | 2.020207 | Conserved hypothetical protein                                     | Unknown                                                        | COG3097 | S    |
| YPO2975     | 0.013969373 | 0.034834517 | 2.016171 | Putative aminotransferase                                          | Unknown                                                        | COG0436 | E    |
| YPO2256     | 0.012530845 | 0.034349747 | 2.013954 | <i>araG</i> L-arabinose transport ATP-binding protein              | Arabinose operon                                               | COG1129 | G    |
| YPO3471     | 0.010156495 | 0.03304557  | 2.006918 | Sugar transport system, permease protein                           | Transport/binding Carbohydrates,organic acids and alcohols     | COG1175 | G    |
| YPO3991     | 0.001093603 | 0.019298639 | 2.004711 | Putative insulinase family protease                                | Degradation of Proteins, peptides and glycopeptides            | COG0612 | R    |
| YPMT1.42    | 0.012490386 | 0.034349747 | 2.001907 |                                                                    |                                                                | COG0715 | P    |
| YPO3476     | 0.006547687 | 0.030706792 | 1.989732 | Putative acetyltransferase                                         | Unknown                                                        | COG3153 | R    |
| YPO3484     | 0.004489408 | 0.026982691 | 1.981591 | Conserved hypothetical protein                                     | Unknown                                                        | COG2141 | C    |
| YPO0835     | 0.004370997 | 0.026955851 | 1.977829 | Putative PTS permease protein                                      | Transport/binding Carbohydrates,organic acids and alcohols     | COG0477 | GEPR |
| YPO2668     | 0.020486289 | 0.038057981 | 1.974273 | <i>ureE</i> Urease accessory protein                               | Pathogenicity                                                  | COG0803 | P    |
| YPO3820     | 0.021704261 | 0.038632787 | 1.966195 | <i>zntA</i> Putative P-type cation-translocating membrane ATPase   | Transport/binding Cations                                      | COG2217 | P    |
| YPO3582     | 0.004888509 | 0.027776406 | 1.964819 | <i>rpoN</i> , $\sigma$ RNA polymerase sigma-54 factor              | RNA synthesis, RNA modification and DNA transcription          | COG1508 | K    |
| YPO3977     | 0.018420537 | 0.036508093 | 1.963837 | <i>gor</i> Glutathione reductase                                   | Oxidative stress                                               | COG1249 | C    |

|          |             |             |          |                  |                                                           |                                                                |         |    |
|----------|-------------|-------------|----------|------------------|-----------------------------------------------------------|----------------------------------------------------------------|---------|----|
| YPO3992  | 0.026984393 | 0.040256329 | 1.960501 | <i>dctA</i>      | C4-dicarboxylate transport protein                        | Transport/binding Carbohydrates,organic acids and alcohols     | COG1301 | C  |
| YPO3047  | 0.047011827 | 0.048690731 | 1.95541  | <i>ydeN</i>      | Putative sulfatase                                        | Sulphur metabolism                                             | COG3119 | P  |
| YPO0842  | 0.006040236 | 0.030310453 | 1.933245 |                  | Putative sulfatase                                        | Sulphur metabolism                                             | COG3119 | P  |
| YPO0569a | 0.009659239 | 0.032670333 | 1.915541 |                  | Conserved hypothetical protein                            | Unknown                                                        |         |    |
| YPO2695  | 0.014875297 | 0.034956394 | 1.915158 | <i>phrB, p</i>   | Putative deoxyribodipyrimidine photolyase                 | DNA replication, restriction/modification, recombination and r | COG0415 | L  |
| YPO3710  | 0.038954407 | 0.045911468 | 1.914775 | <i>malM, r</i>   | Maltose operon periplasmic protein                        | Maltose operon                                                 |         |    |
| YPO2844  | 0.015529225 | 0.034956394 | 1.909612 | <i>goaG, g</i>   | Putative aminobutyrate aminotransferase                   | Central intermediary metabolism                                | COG0160 | E  |
| YPO3689  | 0.003425151 | 0.024960851 | 1.896481 |                  | Putative ribonuclease                                     | Degradation of RNA                                             |         |    |
| YPO3696  | 0.013537557 | 0.034748073 | 1.88891  | <i>treC, ol</i>  | Putative trehalose-6-phosphate hydrolase                  | Degradation of carbon compounds                                | COG0366 | G  |
| YPO3682  | 0.002337924 | 0.021602417 | 1.880617 |                  | Putative lysR-family transcriptional regulatory protein   | Broad regulatory functions                                     | COG0583 | K  |
| YPO2669  | 0.003343794 | 0.02457963  | 1.876672 | <i>ureF</i>      | Urease accessory protein                                  | Pathogenicity                                                  | COG0830 | O  |
| YPO0627  | 0.035890728 | 0.044847424 | 1.875921 |                  | Putative translational inhibitor protein                  | Unknown                                                        | COG0251 | J  |
| YPO3140  | 0.002393942 | 0.021618465 | 1.867499 | <i>ybaY</i>      | Putative lipoprotein                                      | Membranes, lipoproteins and porins                             | COG3126 | S  |
| YPMT1.2c | 0.023286439 | 0.039017462 | 1.863208 |                  |                                                           |                                                                | COG1475 | K  |
| YPO0568  | 0.003890661 | 0.026026647 | 1.8593   |                  | Putative membrane protein                                 | Membranes, lipoproteins and porins                             | COG2259 | S  |
| YPO3272  | 0.003573592 | 0.025248501 | 1.85707  | <i>yfiQ</i>      | Putative acetyltransferase                                | Unknown                                                        | COG1042 | C  |
| YPO0251  | 0.043118175 | 0.047489934 | 1.848547 |                  | Putative transmembrane transport protein                  | Membranes, lipoproteins and porins                             | COG0591 | ER |
| YPO2257  | 0.000528907 | 0.01725695  | 1.847993 | <i>araH</i>      | L-arabinose transport system permease protein             | Arabinose operon                                               | COG1172 | G  |
| YPO3969  | 0.01414622  | 0.034834517 | 1.844485 | <i>uspB</i>      | Universal stress protein B                                | Adaptions and atypical conditions                              |         |    |
| YPO2323  | 0.044414849 | 0.048011847 | 1.843747 | <i>acpD</i>      | Acyl carrier protein phosphodiesterase                    | Fatty acid biosynthesis                                        | COG1182 | I  |
| YPO2510  | 0.016694932 | 0.035480778 | 1.842826 | <i>dps</i>       | Putative DNA-binding protein                              | Broad regulatory functions                                     | COG0783 | P  |
| YPO0678  | 0.016254137 | 0.035390695 | 1.825767 |                  | Putative iron-containing alcohol dehydrogenase            | Unknown                                                        | COG1979 | C  |
| YPO0365  | 0.036694146 | 0.045055609 | 1.81957  |                  | Conserved hypothetical protein                            | Unknown                                                        | COG1162 | R  |
| YPO3589  | 0.016979616 | 0.035522094 | 1.818296 | <i>pyrI</i>      | Aspartate carbamoyltransferase regulatory chain           | Broad regulatory functions                                     | COG1781 | F  |
| YPO1357  | 0.038214936 | 0.045350365 | 1.817387 | <i>ltaA</i>      | L-allo-threonine aldolase                                 | Serine family biosynthesis                                     | COG2008 | E  |
| YPO0931  | 0.000681938 | 0.017718588 | 1.816842 | <i>metK</i>      | S-adenosylmethionine synthetase                           | Central intermediary metabolism                                | COG0192 | H  |
| YPO0628  | 0.015046866 | 0.034956394 | 1.816297 |                  | Putative translational inhibitor protein                  | Unknown                                                        | COG0251 | J  |
| YPO3415  | 0.005665834 | 0.029919034 | 1.811038 | <i>acnB</i>      | Aconitate hydratase 2                                     | Tricarboxylic acid cycle                                       | COG1049 | C  |
| YPO1770  | 0.021186851 | 0.038575491 | 1.798225 | <i>hpaC</i>      | 4-hydroxyphenylacetate 3-monooxygenase coupling prote     | Degradation of carbon compounds                                | COG1853 | R  |
| YPO2705  | 0.042896555 | 0.047359741 | 1.790151 |                  | Conserved hypothetical protein                            | Unknown                                                        | COG3445 | R  |
| YPO2672  | 0.001607498 | 0.02045638  | 1.785324 |                  | Putative urea transporter                                 | Transport/binding Amino acids and amines                       | COG2814 | G  |
| YPO0007  | 0.017004115 | 0.035522094 | 1.783896 |                  | Ribose permease                                           | Transport/binding Carbohydrates,organic acids and alcohols     | COG1869 | G  |
| YPO3588  | 0.00334079  | 0.02457963  | 1.777131 | <i>pyrB</i>      | Aspartate carbamoyltransferase catalytic subunit          | Pyrimidine ribonucleotide biosynthesis                         | COG0540 | F  |
| YPO0913  | 0.004450827 | 0.026955851 | 1.774289 |                  | Putative 5-formyltetrahydrofolate cyclo-ligase-family pro | Unknown                                                        | COG0212 | H  |
| YPO3327  | 0.023235078 | 0.039017462 | 1.767737 | <i>fucR</i>      | Putative deoR-family regulatory protein                   | Broad regulatory functions                                     | COG1349 | KG |
| YPO2670  | 0.001313525 | 0.019849387 | 1.765087 | <i>ureG</i>      | Urease accessory protein                                  | Pathogenicity                                                  | COG0378 | OK |
| YPO0160  | 0.034494811 | 0.044527354 | 1.765087 | <i>nirD</i>      | Nitrite reductase [NAD                                    | Anaerobic respiration                                          | COG2146 | PR |
| YPO1356  | 0.008443903 | 0.032332443 | 1.763323 |                  | Putative membrane protein                                 | Membranes, lipoproteins and porins                             | COG0702 | MG |
| YPO3697  | 0.002683338 | 0.022752142 | 1.763147 | <i>treB</i>      | PTS system, trehalose-specific IIBC component             | Transport/binding Carbohydrates,organic acids and alcohols     | COG1263 | G  |
| YPO3566  | 0.017272445 | 0.03562513  | 1.762089 | <i>degQ, h</i>   | Protease                                                  | Degradation of Proteins, peptides and glycopeptides            | COG0265 | O  |
| YPO0319  | 0.00871662  | 0.032341011 | 1.761913 | <i>gor, hcz</i>  | Quinone oxidoreductase                                    | Degradation of small molecule                                  | COG0604 | CR |
| YPO0274  | 0.023882545 | 0.039017462 | 1.758568 |                  | Putative integral membrane protein                        | Membranes, lipoproteins and porins                             | COG2391 | R  |
| YPO3335  | 0.034146439 | 0.044466581 | 1.749098 | <i>fumA, fi</i>  | Fumarate hydratase, class I                               | Tricarboxylic acid cycle                                       | COG1951 | C  |
| YPO2153  | 0.002988757 | 0.023080789 | 1.733946 |                  | Conserved hypothetical protein                            | Unknown                                                        | COG2766 | T  |
| YPO1567  | 0.024734846 | 0.039115715 | 1.731694 |                  | Putative racemase                                         | Unknown                                                        | COG1441 | H  |
| YPO2958  | 0.035620476 | 0.044730947 | 1.731521 | <i>sfuA, yfi</i> | Iron(III)-binding periplasmic protein                     | Transport/binding Cations                                      | COG1840 | P  |
| YPO0699  | 0.02477705  | 0.039115715 | 1.730655 |                  | Fimbrial chaperone protein                                | Chaperones, chaperonins, heat shock                            | COG3121 | NU |
| YPO1584  | 0.010846718 | 0.033350559 | 1.729444 |                  | Conserved hypothetical protein (pseudogene)               | Unknown                                                        |         |    |
| YPO2152  | 0.001888769 | 0.021336704 | 1.727025 |                  | Conserved hypothetical protein                            | Unknown                                                        | COG2718 | S  |
| acpS     | 0.001061499 | 0.019298639 | 1.725643 | <i>acpS, dj</i>  | Holo-[acyl-carrier protein] synthase                      | Fatty acid biosynthesis                                        |         |    |
| YPO2671  | 0.011218531 | 0.033373987 | 1.719614 | <i>ureD</i>      | Urease accessory protein (pseudogene)                     | Pathogenicity                                                  |         |    |

|             |             |             |          |                  |                                                             |                                                                |         |      |
|-------------|-------------|-------------|----------|------------------|-------------------------------------------------------------|----------------------------------------------------------------|---------|------|
| YPO3530     | 0.025039809 | 0.039190458 | 1.719098 | <i>cpdB</i>      | 2',3'-cyclic-nucleotide 2'-phosphodiesterase precursor      | Salvage of nucleosides and nucleotides                         | COG0737 | F    |
| YPO1857     | 0.022096827 | 0.038728348 | 1.716522 | <i>wrbA</i>      | Trp repressor binding protein                               | Broad regulatory functions                                     | COG0655 | R    |
| <i>sfuA</i> | 0.015405061 | 0.034956394 | 1.715149 | <i>sfuA, yfi</i> | Iron(III)-binding periplasmic protein                       | Transport/binding Cations                                      |         |      |
| YPO2611     | 0.000920492 | 0.019104257 | 1.711138 |                  | Conserved hypothetical protein                              | Unknown                                                        | COG0711 | C    |
| YPO1386     | 0.020587151 | 0.038191941 | 1.710867 | <i>ansB</i>      | Putative L-asparaginase II precursor                        | Degradation of amino acids                                     | COG0252 | EJ   |
| YPO2804     | 0.021685309 | 0.038632787 | 1.709327 |                  | Hypothetical protein                                        | Unknown                                                        |         |      |
| YPO1969     | 0.015568807 | 0.034956394 | 1.708986 |                  | Putative IS1 transposase                                    |                                                                | COG1484 | L    |
| YPO0152     | 0.002945425 | 0.022898051 | 1.706253 | <i>aroB</i>      | 3-dehydroquinate synthase                                   | Aromatic amino acid family biosynthesis                        | COG0337 | E    |
| YPO0455     | 0.021002427 | 0.038543268 | 1.701142 |                  | Putative phosphoglycerate mutase                            |                                                                | COG0406 | G    |
| YPO2201     | 0.008064333 | 0.032332443 | 1.680683 | <i>ompW</i>      | Putative exported protein                                   | Membranes, lipoproteins and porins                             | COG3047 | M    |
| YPO2805     | 0.013724382 | 0.034748073 | 1.679506 |                  | Putative aldol, keto reductase                              | Unknown                                                        | COG0656 | R    |
| YPO0294     | 0.004118319 | 0.026694697 | 1.673136 | <i>terZ</i>      | Tellurium resistance protein                                | Drug/analogue sensitivity                                      | COG2310 | T    |
| YPO0463     | 0.004853264 | 0.027776406 | 1.667624 | <i>talB</i>      | Transaldolase B                                             | Pentose phosphate pathway                                      | COG0176 | G    |
| YPO2367     | 0.015557898 | 0.034956394 | 1.662795 | <i>gst</i>       | Glutathione S-transferase                                   | Thioredoxin Biosynthesis                                       | COG0625 | O    |
| YPO2778     | 0.037228447 | 0.045242152 | 1.655666 |                  | Conserved hypothetical protein                              | Unknown                                                        | COG1090 | R    |
| <i>detA</i> | 0.034123836 | 0.044466581 | 1.65384  | <i>detA</i>      | C4-dicarboxylate transport protein                          | Transport/binding Carbohydrates, organic acids and alcohols    |         |      |
| YPO2597     | 0.015041211 | 0.034956394 | 1.653675 | <i>tatE</i>      | Sec-independent protein translocase protein                 | Transport/binding proteins                                     | COG1826 | U    |
| YPO2929     | 0.004041925 | 0.02644726  | 1.653179 | <i>acpS, dj</i>  | Holo-[acyl-carrier protein] synthase                        | Fatty acid biosynthesis                                        | COG0736 | I    |
| YPO2234     | 0.011267721 | 0.03334077  | 1.645098 | <i>cstA</i>      | Putative carbon starvation protein A                        | Adaptions and atypical conditions                              | COG1966 | T    |
| YPO2073     | 0.00149697  | 0.019849387 | 1.642797 |                  | Putative lipoprotein                                        | Membranes, lipoproteins and porins                             | COG3065 | M    |
| YPO2806     | 0.013720521 | 0.034748073 | 1.632153 |                  | Putative aldol, keto reductase                              | Unknown                                                        | COG0667 | C    |
| YPO3128     | 0.035207117 | 0.044591162 | 1.629381 |                  | Conserved hypothetical protein                              | Unknown                                                        |         |      |
| YPO0917     | 0.016630562 | 0.035480778 | 1.622876 | <i>yggE</i>      | Putative exported protein                                   | Membranes, lipoproteins and porins                             | COG2968 | S    |
| YPO2364     | 0.015559284 | 0.034956394 | 1.621092 |                  | Insertion sequence IS1, ATP-binding protein                 |                                                                | COG1484 | L    |
| YPO3690     | 0.002341355 | 0.021602417 | 1.620768 |                  | Putative ribonuclease inhibitor                             | Unknown                                                        | COG2732 | K    |
| YPCD1.02    | 0.017992273 | 0.036375515 | 1.61931  |                  |                                                             |                                                                | COG1484 | L    |
| YPMT1.66    | 0.022422884 | 0.038972215 | 1.616559 | <i>parA</i>      |                                                             |                                                                | COG1192 | D    |
| YPO2325     | 0.002752214 | 0.022752142 | 1.61559  | <i>dalD</i>      | Putative mannitol dehydrogenase                             | Degradation of carbon compounds                                | COG0246 | G    |
| YPO0372     | 0.032716898 | 0.043409665 | 1.601915 | <i>miaA, tr</i>  | tRNA delta(2)-isopentenylpyrophosphate transferase          | Aminoacyl tRNA synthetases and their modification              | COG0324 | J    |
| YPO2502     | 0.036003881 | 0.044927135 | 1.600474 | <i>gutB</i>      | Putative zinc-binding dehydrogenase                         | Unknown                                                        | COG1063 | ER   |
| YPO0563     | 0.00286935  | 0.022898051 | 1.595201 |                  | Putative exported protein                                   | Membranes, lipoproteins and porins                             |         |      |
| YPO1573     | 0.00221568  | 0.021479969 | 1.587404 |                  | Putative polysaccharide deacetylase                         | Unknown                                                        | COG0726 | G    |
| YPO2362     | 0.022217513 | 0.038728348 | 1.585025 |                  | Putative membrane protein                                   | Membranes, lipoproteins and porins                             |         |      |
| YPO0089     | 0.001611379 | 0.02045638  | 1.581383 | <i>glpX</i>      | GlpX protein (pseudogene)                                   | Central intermediary metabolism                                |         |      |
| YPO0700     | 0.04635886  | 0.048690731 | 1.572552 |                  | Fimbrial protein                                            | Surface structures                                             | COG3539 | NU   |
| <i>terA</i> | 0.023803894 | 0.039017462 | 1.570981 | <i>terA</i>      | Putative tellurite resistance protein                       | Drug/analogue sensitivity                                      |         |      |
| YPO1149     | 0.002149533 | 0.021479969 | 1.565022 |                  | Conserved hypothetical protein                              | Unknown                                                        | COG2706 | G    |
| YPO3787     | 0.011317509 | 0.033480584 | 1.565022 |                  | Putative carboxymethylenebutenolidase                       | Degradation of small molecule                                  | COG0412 | Q    |
| YPO3912     | 0.000913238 | 0.019104257 | 1.561739 | <i>yijD</i>      | Putative membrane protein                                   | Membranes, lipoproteins and porins                             | COG0477 | GEPR |
| YPO0157     | 0.021479683 | 0.038632787 | 1.561739 | <i>trpS</i>      | Tryptophanyl-tRNA synthetase                                | Aminoacyl tRNA synthetases and their modification              | COG0180 | J    |
| YPO2745     | 0.000899758 | 0.019104257 | 1.560802 |                  | Conserved hypothetical protein                              | Unknown                                                        | COG3691 | S    |
| YPO3454     | 0.042313792 | 0.047230602 | 1.559398 | <i>nrdD</i>      | Anaerobic ribonucleoside-triphosphate reductase             | 2 -deoxyribonucleotide biosynthesis                            | COG1328 | F    |
| YPO1118     | 0.013428991 | 0.034748073 | 1.556438 | <i>cydB</i>      | Cytochrome D ubiquinol oxidase subunit II                   | Electron transport                                             | COG1294 | C    |
| YPO2930     | 0.009855552 | 0.032793063 | 1.552862 | <i>pdxJ</i>      | Pyridoxal phosphate biosynthetic protein PdxJ               | Pyridoxine Biosynthesis                                        | COG0854 | H    |
| YPO1501     | 0.002231641 | 0.021479969 | 1.552086 |                  | Putative esterase                                           | Unknown                                                        | COG0627 | R    |
| YPO2299     | 0.049840199 | 0.049925767 | 1.551    | <i>ogt</i>       | Putative methylated-DNA--protein-cysteine methyltransferase | DNA replication, restriction/modification, recombination and r | COG0350 | L    |
| YPO2746     | 0.037423967 | 0.045350365 | 1.550225 |                  | Putative 3-ketoacyl-CoA thiolase                            | Degradation of small molecule                                  | COG0183 | I    |
| YPO0158     | 0.034912718 | 0.044591162 | 1.549295 | <i>cysG</i>      | Siroheme synthase                                           | Heme and porphyrin Biosynthesis                                | COG0007 | H    |
| YPO0752     | 0.037913317 | 0.045350365 | 1.548056 | <i>pcpY, pc</i>  | Putative lipoprotein (pseudogene)                           | Membranes, lipoproteins and porins                             |         |      |
| YPO0114     | 0.008955234 | 0.032589115 | 1.547592 | <i>metJ</i>      | Ranscriptional repressor protein                            | Broad regulatory functions                                     | COG3060 | KE   |
| YPO2158     | 0.025194692 | 0.039190458 | 1.545118 |                  | Conserved hypothetical protein                              | Unknown                                                        | COG0229 | O    |

|          |             |             |          |      |                   |                                                          |                                                                |         |    |
|----------|-------------|-------------|----------|------|-------------------|----------------------------------------------------------|----------------------------------------------------------------|---------|----|
| ompW     | 0.04515344  | 0.048328972 | 1.540643 | 2.47 | <i>ompW</i>       | Putative exported protein                                | Membranes, lipoproteins and porins                             |         |    |
| YPO0838  | 0.037046971 | 0.045242152 | 1.53818  |      |                   | Putative acetylglucosamine-6-phosphate deacetylase       | Degradation of carbon compounds                                | COG1820 | G  |
| YPO1551  | 0.001985576 | 0.021336704 | 1.536028 |      |                   | Putative exported protein                                | Membranes, lipoproteins and porins                             | COG0451 | MG |
| YPO1117  | 0.001495685 | 0.019849387 | 1.53526  |      | <i>cydA</i>       | Cytochrome D ubiquinol oxidase subunit I                 | Electron transport                                             | COG1271 | C  |
| YPO3254  | 0.029652641 | 0.041613421 | 1.534493 |      |                   | Putative amino acid ABC transporter, ATP-binding protein | Transport/binding Amino acids and amines                       | COG1126 | E  |
| YPO1650  | 0.002408785 | 0.021618465 | 1.532959 |      |                   | Hypothetical protein                                     | Unknown                                                        |         |    |
| YPO1968  | 0.012202984 | 0.034340969 | 1.532806 |      |                   | Transposase for insertion sequence IS1                   |                                                                | COG1425 | L  |
| YPO0841  | 0.008783857 | 0.032476773 | 1.530815 |      |                   | Putative regulatory protein                              | Broad regulatory functions                                     | COG0641 | R  |
| YPO3528  | 0.048468966 | 0.048995578 | 1.530355 |      |                   | Putative exported protein                                | Membranes, lipoproteins and porins                             | COG3054 | R  |
| YPO3888  | 0.007180108 | 0.031529203 | 1.524856 |      | <i>ilvC</i>       | Ketol-acid reductoisomerase                              | Pyruvate family biosynthesis                                   | COG0059 | EH |
| YPO0589  | 0.01564546  | 0.034956394 | 1.521657 |      | <i>fadH, fa2</i>  | 4-dienoyl-CoA reductase                                  | Degradation of small molecule                                  | COG1902 | C  |
| YPO0590  | 0.005855431 | 0.030095594 | 1.519984 |      | <i>hdeD</i>       | Putative membrane protein                                | Membranes, lipoproteins and porins                             | COG3247 | S  |
| YPO3639  | 0.02467008  | 0.039115715 | 1.517251 |      | <i>yghU</i>       | Putative glutathione S-transferase                       | Unknown                                                        | COG0625 | O  |
| YPO0560  | 0.00330431  | 0.02457963  | 1.515734 |      | <i>fisZ, sfiU</i> | Cell division protein FtsZ                               | Cell division                                                  | COG0206 | D  |
| YPO1511  | 0.00015233  | 0.0134891   | 1.514674 |      | <i>sfcA, mc</i>   | NAD-dependent malic enzyme                               | Gluconeogenesis                                                | COG0281 | C  |
| YPO1566  | 0.029858057 | 0.041791102 | 1.510892 |      |                   | Putative hydrolase                                       | Degradation of small molecule                                  | COG0179 | Q  |
| YPO1641  | 0.009010891 | 0.032612957 | 1.505011 |      | <i>icdA, ic</i>   | Isocitrate dehydrogenase [NADP]                          | Tricarboxylic acid cycle                                       | COG0538 | C  |
| YPO2363  | 0.002510222 | 0.022045547 | 1.504409 |      |                   | Conserved hypothetical protein                           | Unknown                                                        |         |    |
| YPO0295  | 0.008385312 | 0.032332443 | 1.504108 |      | <i>terA</i>       | Putative tellurite resistance protein                    | Drug/analogue sensitivity                                      | COG2310 | T  |
| YPO1127  | 0.010480782 | 0.033134827 | -1.50005 |      | <i>nadA, n</i>    | Quinolinate synthetase A                                 | Pyridine nucleotide Biosynthesis                               | COG0379 | H  |
| hslR     | 0.040430826 | 0.046843737 | -1.5011  |      | <i>hslR</i>       | Heat shock protein 15                                    | Adaptions and atypical conditions                              |         |    |
| YPO3394  | 0.046012601 | 0.048690731 | -1.50125 |      | <i>hrpB</i>       | ATP-dependent helicase                                   | DNA replication, restriction/modification, recombination and r | COG1643 | L  |
| YPO3811  | 0.044869178 | 0.048168098 | -1.50908 |      | <i>rpoH, h</i>    | RNA polymerase sigma-32 factor                           | RNA synthesis, RNA modification and DNA transcription          | COG0568 | K  |
| YPO2443  | 0.030995783 | 0.042303438 | -1.50923 |      |                   | Putative membrane protein                                | Membranes, lipoproteins and porins                             |         |    |
| YPO1309  | 0.035822853 | 0.044839876 | -1.50999 |      | <i>lysP, ca</i>   | Putative lysine-specific permease                        | Transport/binding Amino acids and amines                       | COG0833 | E  |
| YPO2731  | 0.025387935 | 0.039349123 | -1.51089 |      |                   | Putative membrane protein                                | Membranes, lipoproteins and porins                             | COG1512 | R  |
| YPO4119  | 0.003891333 | 0.026026647 | -1.51118 |      | <i>glmU</i>       | UDP-N-acetylglucosamine pyrophosphorylase                | Sugar nucleotides metabolism                                   | COG1207 | M  |
| YPO0862  | 0.003310716 | 0.02457963  | -1.51483 |      |                   | Putative exported protein                                | Membranes, lipoproteins and porins                             |         |    |
| YPO3137  | 0.021626306 | 0.038632787 | -1.51725 |      |                   | Conserved hypothetical protein                           | Unknown                                                        |         |    |
| YPO2449  | 6.52528E-05 | 0.009786994 | -1.51801 |      |                   | Putative LuxR-family regulatory protein                  | Broad regulatory functions                                     | COG2197 | TK |
| YPO1049  | 0.024625869 | 0.039115715 | -1.51922 |      | <i>uppS, rt</i>   | Undecaprenyl pyrophosphate synthetase                    | Sugar nucleotides metabolism                                   | COG0020 | I  |
| YPO3768  | 0.020636504 | 0.03822026  | -1.51938 |      | <i>fadL, fre</i>  | NAD(P)H-flavin reductase                                 | Electron transport                                             | COG0543 | HC |
| YPO3976  | 0.041235119 | 0.046904392 | -1.52029 |      |                   | Conserved hypothetical protein                           | Unknown                                                        | COG2961 | R  |
| YPO3428  | 0.010710412 | 0.033239226 | -1.52151 |      | <i>guaC</i>       | GMP reductase                                            | Purine ribonucleotide biosynthesis                             | COG0516 | F  |
| YPO0037  | 0.042709327 | 0.047359741 | -1.52303 |      | <i>trmH, sy</i>   | tRNA (guanosine-2'-O-)-methyltransferase                 | Aminoacyl tRNA synthetases and their modification              | COG0566 | J  |
| YPO1326  | 0.016566586 | 0.035480778 | -1.52318 |      |                   | TrkA, Potassium channel-family protein                   | Transport/binding Cations                                      | COG2985 | R  |
| YPO3722  | 0.009205987 | 0.032645574 | -1.52531 |      | <i>metH</i>       | 5-Methyltetrahydrofolate--homocysteine methyltransferase | Aspartate family biosynthesis                                  | COG1410 | E  |
| YPO2218  | 0.007926862 | 0.032332443 | -1.52547 |      | <i>topA, su</i>   | DNA topoisomerase I                                      | DNA replication, restriction/modification, recombination and r | COG0550 | L  |
| YPO3439  | 0.011568752 | 0.033624732 | -1.52623 |      |                   | Putative membrane protein                                | Membranes, lipoproteins and porins                             | COG0795 | R  |
| YPO3376  | 0.04144326  | 0.046969377 | -1.52684 |      | <i>eno</i>        | Enolase                                                  | Glycolysis                                                     | COG0148 | G  |
| YPO3052  | 0.032753053 | 0.043409665 | -1.52898 |      |                   | Conserved hypothetical protein                           | Unknown                                                        | COG1393 | P  |
| YPMT1.65 | 0.022571571 | 0.039017462 | -1.53005 |      |                   |                                                          |                                                                | COG3668 | R  |
| YPO1158  | 0.036942661 | 0.045238369 | -1.53158 |      |                   | Conserved hypothetical protein                           | Unknown                                                        | COG0391 | S  |
| YPO3377  | 0.039512558 | 0.046404601 | -1.53158 |      | <i>pyrG</i>       | CTP synthase                                             | Salvage of nucleosides and nucleotides                         | COG0504 | F  |
| YPO0120  | 0.016763045 | 0.035522094 | -1.53173 |      | <i>glpR</i>       | Glycerol-3-phosphate repressor protein                   | Broad regulatory functions                                     | COG1349 | KG |
| YPO0282  | 0.008499656 | 0.032332443 | -1.53265 |      | <i>hmuS</i>       | Hemin transport protein                                  | Transport/binding proteins                                     |         |    |
| YPO4127  | 0.032828107 | 0.04343108  | -1.53465 |      | <i>atpB, w</i>    | ATP synthase subunit B protein                           | ATP-proton motive force                                        | COG0356 | C  |
| YPO1212  | 0.009232165 | 0.032645574 | -1.5348  |      |                   | Putative iron-sulphur binding protein                    | Unknown                                                        | COG0633 | C  |
| YPO2398  | 0.034845935 | 0.044591162 | -1.53726 |      |                   | Putative exported protein (pseudogene)                   | Membranes, lipoproteins and porins                             |         |    |
| YPPCP1.0 | 3.58257E-05 | 0.007931073 | -1.5388  |      |                   |                                                          |                                                                | COG1396 | K  |
| YPO4107  | 0.038069892 | 0.045350365 | -1.54034 |      | <i>yieG</i>       | Xanthine,uracil permeases family protein                 | Transport/binding Carbohydrates,organic acids and alcohols     | COG2252 | R  |

|         |             |             |          |                   |                                                       |                                                                |         |      |
|---------|-------------|-------------|----------|-------------------|-------------------------------------------------------|----------------------------------------------------------------|---------|------|
| YPO1203 | 0.011910611 | 0.034071988 | -1.54218 |                   | Putative membrane protein                             | Membranes, lipoproteins and porins                             | COG0697 | GER  |
| YPO3829 | 0.009254626 | 0.032645574 | -1.54589 |                   | Putative haloacid dehalogenase-like hydrolase         | Unknown                                                        | COG0561 | R    |
| YPO2075 | 0.001431357 | 0.019849387 | -1.54868 | <i>rnd</i>        | Ribonuclease D                                        | Degradation of RNA                                             | COG0349 | J    |
| YPO0943 | 0.028286419 | 0.040733399 | -1.5493  | <i>yggT</i>       | Putative membrane protein                             | Membranes, lipoproteins and porins                             | COG0762 | S    |
| YPO4086 | 0.020937675 | 0.038542477 | -1.55302 |                   | Putative lipoprotein                                  | Membranes, lipoproteins and porins                             |         |      |
| YPO2370 | 0.014570688 | 0.034956394 | -1.55582 | <i>pdxH</i>       | Pyridoxamine 5'-phosphate oxidase                     | Pyridoxine Biosynthesis                                        | COG0259 | H    |
| YPO3154 | 0.014847729 | 0.034956394 | -1.55613 | <i>hupB, h</i>    | DNA-binding protein HU-beta                           | Adaptions and atypical conditions                              | COG0776 | L    |
| YPO1030 | 0.02455124  | 0.039115715 | -1.55659 |                   | Conserved hypothetical protein                        | Unknown                                                        | COG2363 | S    |
| YPO0671 | 0.033199305 | 0.043747874 | -1.55722 | <i>parC</i>       | DNA topoisomerase IV subunit A                        | DNA replication, restriction/modification, recombination and r | COG0188 | L    |
| YPO4022 | 0.027232649 | 0.040285015 | -1.55737 | <i>fitA</i>       | Putative iron transport protein                       | Transport/binding Cations                                      | COG0614 | P    |
| YPO0660 | 0.026402929 | 0.039943498 | -1.55877 |                   | Conserved hypothetical protein                        | Unknown                                                        | COG0754 | E    |
| yscS    | 0.012882006 | 0.034490359 | -1.5594  | <i>yscS</i>       |                                                       |                                                                |         |      |
| YPO4115 | 0.00929022  | 0.032645574 | -1.56065 | <i>pstA, ph</i>   | Putative phosphate transport system permease          | Transport/binding proteins                                     | COG0581 | P    |
| YPO3302 | 0.022660437 | 0.039017462 | -1.5619  | <i>yqaA</i>       | Putative membrane protein                             | Membranes, lipoproteins and porins                             | COG1238 | S    |
| YPO2056 | 0.021771298 | 0.038637961 | -1.56393 | <i>ruvC</i>       | Crossover junction endonuclease                       | DNA replication, restriction/modification, recombination and r | COG0817 | L    |
| YPO3612 | 0.02434086  | 0.039115715 | -1.56565 |                   | Putative transcriptional regulatory protein           | Broad regulatory functions                                     | COG1396 | K    |
| YPO3834 | 0.008626988 | 0.032332443 | -1.56596 | <i>pldA</i>       | Phospholipase A                                       | Pathogenicity                                                  | COG2829 | M    |
| YPO3432 | 0.011134501 | 0.033373987 | -1.56643 |                   | Conserved hypothetical protein                        | Unknown                                                        | COG3024 | S    |
| YPO2236 | 0.047725346 | 0.048838565 | -1.56721 | <i>zntR</i>       | MerR-family transcriptional regulator                 | Broad regulatory functions                                     | COG0789 | K    |
| YPO0312 | 0.043649627 | 0.047790066 | -1.56737 | <i>plsB, b4</i>   | Glycerol-3-phosphate acyltransferase                  | Synthesis and modification of Phospholipids                    | COG2937 | I    |
| YPO1208 | 0.009761539 | 0.03271037  | -1.56753 |                   | Putative exported protein                             | Membranes, lipoproteins and porins                             |         |      |
| YPO0112 | 0.007339603 | 0.031553633 | -1.56784 |                   | Conserved hypothetical protein                        | Unknown                                                        |         |      |
| YPO2558 | 0.010356912 | 0.033069335 | -1.56878 | <i>aat</i>        | Probable aminotransferase                             | Unknown                                                        | COG0436 | E    |
| YPO3400 | 0.034868773 | 0.044591162 | -1.57177 | <i>folK</i>       | 2-amino-4-hydroxy-6-hydroxymethylidihydropteridine py | Folic acid Biosynthesis                                        | COG0801 | H    |
| YPO3094 | 0.032529553 | 0.043338256 | -1.57413 | <i>rosB, yt</i>   | Putative potassium antiporter                         | Transport/binding Cations                                      | COG0475 | P    |
| YPO2244 | 0.006310573 | 0.030434909 | -1.57665 |                   | Putative iron-sulfur binding NADH dehydrogenase       | Unknown                                                        | COG1726 | C    |
| YPO0445 | 0.006254808 | 0.030374593 | -1.57886 |                   | Conserved hypothetical protein                        | Unknown                                                        | COG3177 | S    |
| YPO0177 | 0.013175797 | 0.034490359 | -1.57933 |                   | Putative membrane protein                             | Membranes, lipoproteins and porins                             | COG0477 | GEPR |
| YPO1855 | 0.013980796 | 0.034834517 | -1.58075 |                   | Putative exported protein                             | Membranes, lipoproteins and porins                             | COG2822 | P    |
| YPO1218 | 0.008192484 | 0.032332443 | -1.58265 | <i>rcsB</i>       | Probable two component response regulator component B | Broad regulatory functions                                     | COG2197 | TK   |
| YPO2387 | 0.001394392 | 0.019849387 | -1.59345 | <i>purR</i>       | Purine nucleotide synthesis repressor                 | Broad regulatory functions                                     | COG1609 | K    |
| yscG    | 0.006588565 | 0.030706792 | -1.59728 | <i>yscG</i>       |                                                       |                                                                |         |      |
| YPO2448 | 0.028717961 | 0.040972496 | -1.59776 | <i>solA, so</i>   | Putative sarcosine oxidase                            | Unknown                                                        | COG0665 | E    |
| YPO2753 | 0.042928657 | 0.047359741 | -1.59839 | <i>yfcA</i>       | Putative membrane protein                             | Membranes, lipoproteins and porins                             | COG0730 | R    |
| YPO4124 | 0.035766838 | 0.044819105 | -1.59903 | <i>atpH, w</i>    | ATP synthase delta subunit protein                    | ATP-proton motive force                                        | COG0712 | C    |
| sufl    | 0.020680662 | 0.03822026  | -1.60095 | <i>sufl</i>       | Putative cell division protein                        | Cell division                                                  |         |      |
| YPO3057 | 0.005414168 | 0.029716995 | -1.60192 | <i>yeaL</i>       | Putative membrane protein                             | Membranes, lipoproteins and porins                             | COG2707 | S    |
| YPO1023 | 0.024913408 | 0.039115715 | -1.60256 |                   | N-acetylmuramoyl-L-alanine amidase AmiC precursor     | Murein sacculus and peptidoglycan                              | COG0860 | M    |
| YPO1735 | 0.014285636 | 0.03488102  | -1.60304 |                   | Putative ABC transporter (ATP-binding protein)        | Transport/binding proteins                                     | COG1132 | V    |
| YPO2607 | 0.047031026 | 0.048690731 | -1.60304 | <i>nadD</i>       | Putative nicotinate-nucleotide adenyltransferase      | Unknown                                                        | COG1057 | H    |
| pheS    | 0.004699878 | 0.027745502 | -1.6032  | <i>pheS</i>       | Phenylalanyl-tRNA synthetase alpha chain              | Aminoacyl tRNA synthetases and their modification              |         |      |
| YPO1753 | 0.034249175 | 0.044527354 | -1.60384 | <i>fcuA</i>       | Ferriochrome receptor protein                         | Cell envelop                                                   | COG1629 | P    |
| YPO2061 | 0.044451212 | 0.048011847 | -1.6085  | <i>znuA</i>       | Exported high-affinity zinc uptake system protein     | Transport/binding Cations                                      | COG0803 | P    |
| YPO1702 | 0.033438363 | 0.043888728 | -1.60914 | <i>yebS</i>       | Putative membrane protein                             | Membranes, lipoproteins and porins                             | COG2995 | S    |
| YPO2430 | 0.036522218 | 0.045055609 | -1.60914 | <i>rplT, pd</i>   | 5S ribosomal protein L2                               | Ribosomal protein synthesis and modification                   | COG0292 | J    |
| YPO3077 | 0.02102218  | 0.038543268 | -1.61011 | <i>purK</i>       | Phosphoribosylaminoimidazole carboxylase ATPase subu  | Purine ribonucleotide biosynthesis                             | COG0026 | F    |
| YPO0306 | 0.037795162 | 0.045350365 | -1.61123 |                   | Hypothetical protein                                  | Unknown                                                        |         |      |
| YPO1404 | 0.037893745 | 0.045350365 | -1.61188 | <i>mukE, k</i>    | Conserved hypothetical protein                        | Unknown                                                        | COG3095 | D    |
| YPO0651 | 0.001982245 | 0.021336704 | -1.61704 |                   | Putative exported protein                             | Membranes, lipoproteins and porins                             | COG3103 | T    |
| YPO1688 | 0.012324542 | 0.034349747 | -1.61704 |                   | Hypothetical protein                                  | Unknown                                                        |         |      |
| yscM    | 0.001305458 | 0.019849387 | -1.61753 | <i>yscM, lcrQ</i> |                                                       |                                                                |         |      |

|         |             |             |          |                         |                                                            |                                                                |         |      |
|---------|-------------|-------------|----------|-------------------------|------------------------------------------------------------|----------------------------------------------------------------|---------|------|
| YPO2878 | 0.04766345  | 0.048838565 | -1.61753 | <i>hisS</i>             | Histidyl-tRNA synthetase                                   | Aminoacyl tRNA synthetases and their modification              | COG0124 | J    |
| YPO0881 | 0.018374605 | 0.036508093 | -1.62174 |                         | Conserved hypothetical protein                             | Unknown                                                        | COG2944 | K    |
| YPO3390 | 0.04610718  | 0.048690731 | -1.62596 | <i>fhuB</i>             | Ferrichrome transport system permease protein FhuB         | Transport/binding Cations                                      | COG0609 | P    |
| YPO3754 | 0.04458166  | 0.04802658  | -1.62629 | <i>tufA, tuj</i>        | Elongation factor Tu                                       | Protein translation and modification                           | COG0050 | J    |
| YPO3513 | 0.003106483 | 0.023851261 | -1.62743 | <i>ispB, ce</i>         | Octaprenyl-diphosphate synthase                            | Menaquinone and ubiquinone Biosynthesis                        | COG0142 | H    |
| YPO1405 | 0.02519988  | 0.039190458 | -1.62938 | <i>mukB</i>             | Cell division protein                                      | Cell division                                                  | COG3096 | D    |
| YPO3372 | 0.026208527 | 0.039943498 | -1.62954 | <i>cysJ</i>             | Sulfite reductase [NADPH] flavoprotein alpha-componen      | Sulphur metabolism                                             | COG0369 | P    |
| YPO2174 | 0.041397569 | 0.046968538 | -1.63068 | <i>pmrE</i>             | Putative nucleotide sugar dehydrogenase                    | Sugar nucleotides metabolism                                   | COG1004 | M    |
| YPO2400 | 0.018593959 | 0.036508093 | -1.63215 | <i>sufS</i>             | Putative selenocysteine lyase                              | Central intermediary metabolism                                | COG0520 | E    |
| YPO1068 | 0.018359817 | 0.036508093 | -1.63248 | <i>proS, dr</i>         | Prolyl-tRNA synthetase                                     | Aminoacyl tRNA synthetases and their modification              | COG0442 | J    |
| YPO2047 | 0.000467258 | 0.01718606  | -1.63362 |                         | Conserved hypothetical protein                             | Unknown                                                        | COG3102 | S    |
| YPO3779 | 0.036155298 | 0.044966511 | -1.63542 | <i>aarF</i>             | Ubiquinone biosynthesis protein                            | Menaquinone and ubiquinone Biosynthesis                        | COG0661 | R    |
| YPO2780 | 0.009220768 | 0.032645574 | -1.63575 |                         | Conserved hypothetical protein                             | Unknown                                                        | COG0622 | R    |
| YPO1525 | 0.016913649 | 0.035522094 | -1.63575 | <i>dcd, dus</i>         | Deoxycytidine triphosphate deaminase                       | 2 -deoxyribonucleotide biosynthesis                            | COG0717 | F    |
| YPO1037 | 0.041004295 | 0.046904392 | -1.63837 |                         | Conserved hypothetical protein                             | Unknown                                                        | COG3098 | S    |
| YPO1025 | 0.007638172 | 0.03220827  | -1.63984 |                         | Membrane-bound lytic murein transglycosylase A precurs     | Murein sacculus and peptidoglycan                              | COG2821 | M    |
| YPO2708 | 0.030591685 | 0.042151677 | -1.64165 | <i>srmB, ri</i>         | ATP-dependent RNA helicase                                 | RNA synthesis, RNA modification and DNA transcription          | COG0513 | LKJ  |
| YPO4130 | 0.033281496 | 0.043812715 | -1.6474  | <i>gidA</i>             | Glucose inhibited division protein A                       | Cell division                                                  | COG0445 | D    |
| YPO3393 | 0.025801732 | 0.039776249 | -1.64856 | <i>mrcB</i>             | Penicillin-binding protein 1B                              | Murein sacculus and peptidoglycan                              | COG0744 | M    |
| YPO4113 | 0.008844602 | 0.032476773 | -1.64905 | <i>phoU, n</i>          | Putative phosphate transport system protein                | Central intermediary metabolism                                | COG0704 | P    |
| YPO3397 | 0.006784286 | 0.031073821 | -1.64955 | <i>dksA</i>             | DnaK suppressor protein homologue                          | Broad regulatory functions                                     | COG1734 | T    |
| YPO3448 | 0.017159173 | 0.035559502 | -1.65235 |                         | Putative extracellular solute-binding protein (pseudogene) | Transport/binding proteins                                     |         |      |
| yscH    | 0.000708948 | 0.017718588 | -1.65334 | <i>yscH, yopR, lcrP</i> | Putative exported protein                                  | Membranes, lipoproteins and porins                             | COG2353 | S    |
| YPO2315 | 0.002330805 | 0.021602417 | -1.65533 |                         | Putative membrane protein                                  | Membranes, lipoproteins and porins                             | COG3083 | R    |
| YPO1260 | 0.015078865 | 0.034956394 | -1.65533 |                         | Putative membrane protein                                  | Membranes, lipoproteins and porins                             | COG0162 | J    |
| YPO2369 | 0.011778525 | 0.033997735 | -1.65616 | <i>tyrS</i>             | Tyrosyl-tRNA synthetase                                    | Aminoacyl tRNA synthetases and their modification              | COG0162 | J    |
| YPO1444 | 0.034562482 | 0.044541346 | -1.65881 |                         | Conserved hypothetical protein                             | Unknown                                                        |         |      |
| YPO0240 | 0.043898345 | 0.047957484 | -1.65881 |                         | Conserved hypothetical protein                             | Unknown                                                        | COG0144 | J    |
| YPO1755 | 0.027991414 | 0.040733399 | -1.65964 | <i>yobD</i>             | Putative membrane protein                                  | Membranes, lipoproteins and porins                             |         |      |
| YPO4025 | 0.019432208 | 0.037273669 | -1.66263 | <i>fitD</i>             | Putative iron ABC transporter, ATP-binding protein         | Transport/binding Cations                                      | COG1120 | PH   |
| YPO3170 | 0.019061157 | 0.036907416 | -1.6628  |                         | Conserved hypothetical protein                             | Unknown                                                        | COG1666 | S    |
| YPO1773 | 0.041135628 | 0.046904392 | -1.66779 | <i>pabB</i>             | Para-aminobenzoate synthase component I                    | Folic acid Biosynthesis                                        | COG0147 | EH   |
| YPO1351 | 0.011000943 | 0.03336898  | -1.66796 | <i>artI</i>             | Arginine-binding periplasmic protein 1 precursor           | Transport/binding Amino acids and amines                       | COG0834 | ET   |
| YPO2335 | 0.01402257  | 0.034834517 | -1.66796 |                         | Conserved hypothetical protein                             | Unknown                                                        | COG0037 | D    |
| YPO4128 | 0.041999582 | 0.047157278 | -1.66812 | <i>atpI, un</i>         | ATP synthase protein I                                     | ATP-proton motive force                                        | COG3312 | C    |
| YPO1594 | 0.037228106 | 0.045242152 | -1.66863 |                         | Conserved hypothetical protein                             | Unknown                                                        | COG1399 | R    |
| YPO1505 | 0.006771853 | 0.031073821 | -1.66879 | <i>folE</i>             | GTP cyclohydrolase I                                       | Folic acid Biosynthesis                                        | COG0302 | H    |
| YPO2235 | 0.044774058 | 0.048155733 | -1.67096 | <i>rnb</i>              | Exoribonuclease II                                         | Degradation of RNA                                             | COG0557 | K    |
| YPO2704 | 0.010134288 | 0.03304557  | -1.67464 | <i>ung</i>              | Putative uracil-DNA glycosylase                            | DNA replication, restriction/modification, recombination and r | COG0692 | L    |
| YPO4048 | 0.048176835 | 0.04891816  | -1.6785  | <i>mdfA, c</i>          | Multidrug translocase                                      | Drug/analogue sensitivity                                      | COG0477 | GEPR |
| YPO4125 | 0.015642036 | 0.034956394 | -1.68759 | <i>atpF, un</i>         | ATP synthase subunit B protein                             | ATP-proton motive force                                        | COG0711 | C    |
| YPO3866 | 0.012440496 | 0.034349747 | -1.69503 | <i>rfe, b37</i>         | Putative undecaprenyl-phosphate alpha-N-acetylglucosar     | Surface polysaccharides, lipopolysaccharides and antigens      | COG0472 | M    |
| YPO0950 | 0.023646663 | 0.039017462 | -1.69503 |                         | Conserved hypothetical protein                             | Unknown                                                        | COG3171 | S    |
| YPO3505 | 0.010302516 | 0.03304557  | -1.69706 | <i>greA</i>             | Transcription elongation factor                            | RNA synthesis, RNA modification and DNA transcription          | COG0782 | K    |
| YPO3321 | 0.000312735 | 0.016712285 | -1.69757 | <i>cybB</i>             | Probable cytochrome B561                                   | Electron transport                                             | COG3038 | C    |
| YPO2245 | 0.015584443 | 0.034956394 | -1.69757 |                         | Putative iron-sulfur protein                               | Unknown                                                        | COG2878 | C    |
| YPO3010 | 0.015145456 | 0.034956394 | -1.70199 |                         | Hypothetical protein                                       | Unknown                                                        |         |      |
| YPO0309 | 0.012653882 | 0.034426687 | -1.71189 |                         | Putative exported protein                                  | Membranes, lipoproteins and porins                             | COG3468 | MU   |
| YPO2403 | 0.005042714 | 0.028262688 | -1.71927 | <i>sufB</i>             | Conserved hypothetical protein                             | Unknown                                                        | COG0719 | O    |
| yscL    | 0.002947855 | 0.022898051 | -1.72013 | <i>yscL</i>             |                                                            |                                                                |         |      |
| YPO3769 | 0.018518715 | 0.036508093 | -1.72168 |                         | Conserved hypothetical protein                             | Unknown                                                        | COG0043 | H    |



|              |             |             |          |                                                                     |                                                            |                                                                |         |   |
|--------------|-------------|-------------|----------|---------------------------------------------------------------------|------------------------------------------------------------|----------------------------------------------------------------|---------|---|
| YPO0239      | 0.005879066 | 0.030095594 | -1.72444 | <i>trkA</i>                                                         | Trk system potassium uptake protein                        | Transport/binding proteins                                     | COG0569 | P |
| <i>ipk</i>   | 0.003826612 | 0.026026647 | -1.72547 | <i>ipk</i>                                                          | Putative 4-diphosphocytidyl-2-C-methyl-D-erythritol kinase | Menaquinone and ubiquinone Biosynthesis                        |         |   |
| YPO0338      | 0.027616123 | 0.040505664 | -1.72668 |                                                                     | Hypothetical protein                                       | Unknown                                                        |         |   |
| YPO2404      | 0.001484006 | 0.019849387 | -1.72806 | <i>sufA</i>                                                         | Conserved hypothetical protein                             | Unknown                                                        | COG0316 | S |
| YPO1031      | 0.006425958 | 0.030434909 | -1.72962 |                                                                     | Conserved hypothetical protein                             | Unknown                                                        | COG2933 | R |
| YPO3079      | 0.01990415  | 0.037684198 | -1.73204 | <i>ybbA</i>                                                         | Putative ABC transporter ATP-binding protein               | AI-2                                                           | COG1136 | V |
| YPO2368      | 0.017850569 | 0.036199225 | -1.73429 | <i>pdxY</i>                                                         | Pyridoxamine kinase                                        | Central intermediary metabolism                                | COG2240 | H |
| YPO2993      | 0.000545663 | 0.01725695  | -1.7362  | <i>ptsH, h<sub>4</sub></i>                                          | PTS system, phosphocarrier protein                         | Transport/binding Carbohydrates,organic acids and alcohols     | COG1925 | G |
| YPO1098      | 0.008630675 | 0.032332443 | -1.73794 |                                                                     | Putative prophage integrase                                |                                                                | COG0582 | L |
| <i>intA</i>  | 0.009715433 | 0.032670333 | -1.73846 | <i>intA</i>                                                         | Phage integrase (partial)                                  |                                                                |         |   |
| YPO3443      | 0.004140032 | 0.026694697 | -1.74124 | <i>valS</i>                                                         | Valyl-tRNA synthetase                                      | Aminoacyl tRNA synthetases and their modification              | COG0525 | J |
| YPO0672      | 0.01890982  | 0.036721447 | -1.74351 | <i>plsC, pc</i>                                                     | Putative acyltransferase                                   | Unknown                                                        | COG0204 | I |
| YPO1597      | 0.047994936 | 0.048914567 | -1.74386 | <i>fabH</i>                                                         | 3-oxoacyl-[acyl-carrier-protein] synthase III              | Fatty acid biosynthesis                                        | COG0332 | I |
| YPO1420      | 0.031236949 | 0.042327267 | -1.75155 | <i>pqiA</i>                                                         | Putative paraquat-inducible protein A                      | Membranes, lipoproteins and porins                             | COG2995 | S |
| <i>ptsI</i>  | 0.007552935 | 0.032015477 | -1.75242 | <i>ptsI</i>                                                         | PTS sytem, enzyme I component                              | Transport/binding Carbohydrates,organic acids and alcohols     |         |   |
| YPO1086a     | 0.007314177 | 0.031553633 | -1.75313 |                                                                     | Phage integrase (partial)                                  |                                                                | COG0582 | L |
| YPO2273      | 0.01541687  | 0.034956394 | -1.75523 |                                                                     | Phage hypothetical protein                                 | Unknown                                                        | COG2932 | K |
| <i>yscI</i>  | 0.000708852 | 0.017718588 | -1.75558 | <i>yscI, lcrO</i>                                                   |                                                            |                                                                |         |   |
| YPO3410      | 0.024639469 | 0.039115715 | -1.75558 | <i>yacC</i>                                                         | Putative exported protein                                  | Membranes, lipoproteins and porins                             |         |   |
| YPO3206      | 0.044653338 | 0.048064815 | -1.75804 | <i>sbcD</i>                                                         | Exonuclease SbcD                                           | Degradation of DNA                                             | COG0420 | L |
| YPO3013      | 0.016574259 | 0.035480778 | -1.75874 | <i>cysW</i>                                                         | Sulfate transport system permease protein CysW             | Transport/binding Anions                                       | COG0555 | O |
| YPO3118      | 0.005613108 | 0.029919034 | -1.76191 | <i>adk, pls</i>                                                     | Adenylylate kinase                                         | Purine ribonucleotide biosynthesis                             | COG0563 | F |
| YPO1636      | 0.048382957 | 0.048983191 | -1.76191 | <i>purB</i>                                                         | Adenylosuccinate lyase                                     | Purine ribonucleotide biosynthesis                             | COG0015 | F |
| YPO2755      | 0.008223997 | 0.032332443 | -1.76456 |                                                                     | Conserved hypothetical protein                             | Unknown                                                        |         |   |
| YPO0165      | 0.021539123 | 0.038632787 | -1.77252 |                                                                     | LacI-family transcriptional regulator                      | Broad regulatory functions                                     | COG1609 | K |
| YPO0944      | 0.044084683 | 0.048011847 | -1.77731 |                                                                     | Conserved hypothetical protein                             | Unknown                                                        | COG1872 | S |
| YPO0280      | 0.007886662 | 0.032332443 | -1.78229 | <i>hmuU</i>                                                         | Hemin transport system permease protein HmuU               | Transport/binding proteins                                     | COG0609 | P |
| YPO4064      | 0.005728151 | 0.029973848 | -1.78407 |                                                                     | Hypothetical protein                                       | Unknown                                                        |         |   |
| YPO3120      | 0.001994208 | 0.021336704 | -1.79123 | <i>recR</i>                                                         | Recombination protein RecR                                 | DNA replication, restriction/modification, recombination and r | COG0353 | L |
| YPO1854      | 0.001205195 | 0.019298639 | -1.7932  |                                                                     | Putative membrane protein                                  | Membranes, lipoproteins and porins                             | COG0672 | P |
| YPO3320      | 0.000344471 | 0.016712285 | -1.80273 | <i>cybC</i>                                                         | Putative cytochrome B562                                   | Electron transport                                             |         |   |
| YPO0952      | 0.019614971 | 0.037434059 | -1.80399 | <i>mutY, m A, G-specific adenine glycosylase</i>                    |                                                            | DNA replication, restriction/modification, recombination and r | COG1194 | L |
| YPO3360      | 0.011482174 | 0.03357332  | -1.80543 | <i>ispF, mc2C-methyl-D-erythritol 2,4-cyclodiphosphate synthase</i> |                                                            | Central intermediary metabolism                                | COG0245 | I |
| YPO3364      | 0.000276943 | 0.016712285 | -1.80868 | <i>cysC</i>                                                         | Adenylylsulfate kinase                                     | Sulphur metabolism                                             | COG0529 | P |
| YPO1522      | 0.030855576 | 0.04228564  | -1.81013 | <i>metG</i>                                                         | Methionyl-tRNA synthetase                                  | Aminoacyl tRNA synthetases and their modification              | COG0143 | J |
| YPO4093      | 0.030229015 | 0.041957104 | -1.81321 |                                                                     | Putative haloacid dehalogenase-like hydrolase              | Unknown                                                        | COG0561 | R |
| YPO2402      | 0.014699348 | 0.034956394 | -1.81503 | <i>sufC</i>                                                         | Putative ATP-dependent transporter                         | Transport/binding proteins                                     | COG0396 | O |
| YPO1628      | 0.044894345 | 0.048168098 | -1.81993 | <i>lolE</i>                                                         | Lipoprotein releasing system, transmembrane protein        | Membranes, lipoproteins and porins                             | COG0577 | V |
| YPO1575      | 0.021641702 | 0.038632787 | -1.82412 |                                                                     | 225 conserved hypothetical protein                         | Unknown                                                        | COG3122 | S |
| <i>msbA</i>  | 0.032390125 | 0.043282739 | -1.8254  | <i>msbA</i>                                                         | Probable transport ATP-binding protein                     | Transport/binding proteins                                     |         |   |
| YPO1524      | 0.031436808 | 0.042392665 | -1.83345 | <i>udk, b2U</i>                                                     | Uridine kinase                                             | Miscellaneous nucleoside/nucleotide reactions                  | COG0572 | F |
| YPO2429      | 0.012360623 | 0.034349747 | -1.83584 | <i>pheS</i>                                                         | Phenylalanyl-tRNA synthetase alpha chain                   | Aminoacyl tRNA synthetases and their modification              | COG0016 | J |
| YPO3911      | 0.008830168 | 0.032476773 | -1.83933 | <i>trmA</i>                                                         | tRNA (uracil-5)-methyltransferase                          | Aminoacyl tRNA synthetases and their modification              | COG2265 | J |
| YPO3391      | 0.04809422  | 0.048914567 | -1.84154 | <i>fhuD</i>                                                         | Ferrichrome-binding periplasmic protein precursor          | Transport/binding Cations                                      | COG0614 | P |
| <i>yopM</i>  | 0.040325904 | 0.046843737 | -1.84264 | <i>yopM</i>                                                         | Probable targeted effector protein                         | YOP                                                            |         |   |
| <i>caf1A</i> | 0.000495847 | 0.01725695  | -1.84744 | <i>caf1A</i>                                                        | Putative F1 capsule anchoring protein, caf1A               |                                                                |         |   |
| YPO4084      | 0.010190711 | 0.03304557  | -1.84966 | <i>ibpB, hs</i>                                                     | Heat shock protein                                         | Adaptions and atypical conditions                              | COG0071 | O |
| YPO3570      | 0.024622294 | 0.039115715 | -1.85466 |                                                                     | BolA-like protein                                          | Unknown                                                        | COG0271 | T |
| YPO3123      | 0.00686101  | 0.031317247 | -1.86209 | <i>apt</i>                                                          | Adenine phosphoribosyltransferase                          | Salvage of nucleosides and nucleotides                         | COG0503 | F |
| YPO2994      | 0.015432568 | 0.034956394 | -1.86433 | <i>ptsI</i>                                                         | PTS sytem, enzyme I component                              | Transport/binding Carbohydrates,organic acids and alcohols     | COG1080 | G |
| YPO1856      | 0.000683077 | 0.017718588 | -1.86713 |                                                                     | Conserved hypothetical protein                             | Unknown                                                        | COG2837 | P |

|         |             |             |          |                   |                                                     |                                                                |         |    |
|---------|-------------|-------------|----------|-------------------|-----------------------------------------------------|----------------------------------------------------------------|---------|----|
| YPO3026 | 0.030287092 | 0.041957104 | -1.86881 | <i>yfeY</i>       | Putative lipoprotein                                | Membranes, lipoproteins and porins                             |         |    |
| YPO0954 | 0.013754732 | 0.034748073 | -1.87142 | <i>mltC</i>       | Membrane-bound lytic murein transglycosylase C      | Murein sacculus and peptidoglycan                              | COG0741 | M  |
| YPO3153 | 0.009234023 | 0.032645574 | -1.87611 | <i>ppiD</i>       | Peptidyl-prolyl cis-trans isomerase D               | Protein translation and modification                           | COG0760 | O  |
| YPO0644 | 0.046380077 | 0.048690731 | -1.88401 | <i>dnaG, a</i>    | DNA primase                                         | DNA replication, restriction/modification, recombination and r | COG0358 | L  |
| YPO2559 | 0.002406245 | 0.021618465 | -1.89118 |                   | Conserved hypothetical protein                      | Unknown                                                        | COG1896 | R  |
| nusG    | 0.012491547 | 0.034349747 | -1.89534 | <i>nusG</i>       | Transcription antitermination protein               | RNA synthesis, RNA modification and DNA transcription          |         |    |
| YPO1284 | 0.009054919 | 0.032645574 | -1.89629 |                   | Putative elongation factor P                        | Protein translation and modification                           | COG0231 | J  |
| metG    | 0.016412748 | 0.035390695 | -1.90104 | <i>metG</i>       | Methionyl-tRNA synthetase                           | Aminoacyl tRNA synthetases and their modification              |         |    |
| YPO1531 | 0.021443827 | 0.038632787 | -1.90465 | <i>alcB</i>       | Putative siderophore biosynthetic enzyme            | Iron uptake                                                    | COG1670 | J  |
| YPO4085 | 0.029682623 | 0.041613421 | -1.90465 | <i>ibpA, hs</i>   | Heat shock protein                                  | Adaptions and atypical conditions                              | COG0071 | O  |
| YPO2908 | 0.04177422  | 0.047103324 | -1.90503 | <i>hmp, hn</i>    | Flavoheomprotein                                    | Aerobic respiration                                            | COG1018 | C  |
| YPO1350 | 0.043026873 | 0.047428702 | -1.90599 | <i>artQ</i>       | Arginine transport system permease protein          | Transport/binding Amino acids and amines                       | COG0765 | E  |
| YPO2565 | 0.046299294 | 0.048690731 | -1.91152 |                   | Hypothetical protein                                | Unknown                                                        |         |    |
| YPO1107 | 0.003519477 | 0.025248501 | -1.91229 | <i>grpE</i>       | Heat shock protein GrpE                             | Adaptions and atypical conditions                              | COG0576 | O  |
| YPO3138 | 0.001714867 | 0.020788226 | -1.91612 | <i>ymoA</i>       | Modulating protein YmoA (histone-like protein)      | Broad regulatory functions                                     | COG0326 | O  |
| YPO2246 | 0.034477864 | 0.044527354 | -1.91861 |                   | Putative membrane protein                           | Membranes, lipoproteins and porins                             | COG2209 | C  |
| YPO2399 | 0.023958377 | 0.039017462 | -1.92283 | <i>sufE</i>       | Conserved hypothetical protein                      | Unknown                                                        | COG2166 | R  |
| YPO3760 | 0.013572046 | 0.034748073 | -1.92553 | <i>murB</i>       | UDP-N-acetylenolpyruvoylglucosamine reductase       | Murein sacculus and peptidoglycan                              | COG0812 | M  |
| YPO2991 | 0.000919192 | 0.019104257 | -1.92572 | <i>cysZ</i>       | Putative membrane protein                           | Membranes, lipoproteins and porins                             | COG2981 | E  |
| yscJ    | 0.000137016 | 0.012999653 | -1.9346  | <i>yscJ, ylpB</i> |                                                     |                                                                |         |    |
| YPO1627 | 0.010553374 | 0.033139004 | -1.93944 | <i>lolD</i>       | Lipoprotein releasing system, ATP-binding protein   | Membranes, lipoproteins and porins                             | COG1136 | V  |
| YPO2659 | 0.010429114 | 0.033134827 | -1.93964 | <i>cspB</i>       | Cold shock protein                                  | Adaptions and atypical conditions                              | COG1278 | K  |
| YPO1431 | 0.010039596 | 0.03304557  | -1.94897 |                   | Putative Lon protease                               | Unknown                                                        | COG1067 | O  |
| YPO0050 | 0.046901647 | 0.048690731 | -1.95033 | <i>rpmB</i>       | 5S ribosomal protein L28                            | Ribosomal protein synthesis and modification                   | COG0227 | J  |
| YPO2401 | 0.006571501 | 0.030706792 | -1.95228 | <i>sufD</i>       | Conserved hypothetical protein                      | Unknown                                                        | COG0719 | O  |
| YPO3386 | 0.017407561 | 0.035748992 | -1.95874 | <i>yadS</i>       | Putative membrane protein                           | Membranes, lipoproteins and porins                             | COG2860 | S  |
| YPO3569 | 0.015127421 | 0.034956394 | -1.95932 | <i>murA, n</i>    | UDP-N-acetylglucosamine 1-carboxyvinyltransferase   | Murein sacculus and peptidoglycan                              | COG0766 | M  |
| YPO1418 | 0.041523086 | 0.046997203 | -1.96089 |                   | Conserved hypothetical protein                      | Unknown                                                        | COG0116 | L  |
| YPO0643 | 0.014096462 | 0.034834517 | -1.96129 | <i>rpoD, a</i>    | RNA polymerase sigma factor RpoD                    | RNA synthesis, RNA modification and DNA transcription          | COG0568 | K  |
| YPO2635 | 0.008106512 | 0.032332443 | -1.96187 | <i>fldA</i>       | Flavodoxin 1                                        | Electron transport                                             | COG0716 | C  |
| YPO1385 | 0.024028343 | 0.039017462 | -1.96227 |                   | Conserved hypothetical protein                      | Unknown                                                        | COG1944 | S  |
| YPO1262 | 0.042123375 | 0.047216448 | -1.96384 |                   | Putative nucleoid-associated protein                | Unknown                                                        | COG3081 | R  |
| YPO0042 | 0.01598209  | 0.035233071 | -1.9658  |                   | Putative membrane protein                           | Membranes, lipoproteins and porins                             | COG2860 | S  |
| YPO0442 | 0.016450202 | 0.035413965 | -1.97348 | <i>serB, b4</i>   | Phosphoserine phosphatase                           | Serine family biosynthesis                                     | COG0560 | E  |
| YPO3753 | 0.022175262 | 0.038728348 | -1.97724 | <i>secE, p1</i>   | Preprotein translocase SecE subunit                 | Transport/binding proteins                                     | COG0690 | U  |
| YPO2428 | 0.024520069 | 0.039115715 | -1.9802  | <i>pheT</i>       | Phenylalanyl-tRNA synthetase beta chain             | Aminoacyl tRNA synthetases and their modification              | COG0072 | J  |
| YPO1595 | 0.021787506 | 0.038637961 | -1.98179 | <i>rpmF</i>       | Ribosomal protein L32                               | Ribosomal protein synthesis and modification                   | COG0333 | J  |
| YPO1601 | 0.025534247 | 0.039437839 | -1.98377 | <i>fabF, fa</i>   | 3-oxoacyl-[acyl-carrier-protein] synthase II        | Fatty acid biosynthesis                                        | COG0304 | IQ |
| YPO3189 | 0.028462808 | 0.04087187  | -1.99372 | <i>secD</i>       | Protein-export membrane protein SecD                | Transport/binding proteins                                     | COG0342 | U  |
| YPO3873 | 0.006438576 | 0.030434909 | -1.99731 | <i>ppiC</i>       | Peptidyl-prolyl cis-trans isomerase C               | Protein translation and modification                           | COG0760 | O  |
| YPO3746 | 0.046825899 | 0.048690731 | -2.01013 | <i>rpoC, tc</i>   | DNA-directed RNA polymerase beta, chain             | RNA synthesis, RNA modification and DNA transcription          | COG0086 | K  |
| YPO3361 | 0.015430824 | 0.034956394 | -2.03236 | <i>ispD, bz</i>   | 4-diphosphocytidyl-2C-methyl-D-erythritol synthase  | Central intermediary metabolism                                | COG1211 | I  |
| YPO1626 | 0.040994579 | 0.046904392 | -2.03481 | <i>lolC</i>       | Lipoprotein releasing system, transmembrane protein | Membranes, lipoproteins and porins                             | COG0577 | V  |
| YPO3362 | 0.002703397 | 0.022752142 | -2.04316 |                   | Conserved hypothetical protein                      | Unknown                                                        | COG2919 | D  |
| yopP    | 0.000642748 | 0.017718588 | -2.0448  | <i>yopP, yc</i>   | Putative targeted effector protein                  | YOP                                                            |         |    |
| YPO0281 | 0.014237705 | 0.034834517 | -2.04541 | <i>hmuT</i>       | Hemin-binding periplasmic protein                   | Transport/binding proteins                                     | COG0614 | P  |
| YPO0228 | 0.047164835 | 0.048709161 | -2.04746 | <i>rplO</i>       | 5S ribosomal protein L15                            | Ribosomal protein synthesis and modification                   | COG0200 | J  |
| YPO3752 | 0.023929875 | 0.039017462 | -2.04807 | <i>nusG</i>       | Transcription antitermination protein               | RNA synthesis, RNA modification and DNA transcription          | COG0250 | K  |
| YPO2011 | 0.017327453 | 0.035683176 | -2.04971 | <i>pth</i>        | Peptidyl-tRNA hydrolase                             | Aminoacyl tRNA synthetases and their modification              | COG0193 | J  |
| YPO2452 | 0.025198862 | 0.039190458 | -2.05012 |                   | Hypothetical protein                                | Unknown                                                        | COG1063 | ER |
| YPO0955 | 0.027397586 | 0.040345421 | -2.06618 |                   | Hypothetical protein                                | Unknown                                                        | COG0614 | P  |

|         |             |             |          |                   |                                                           |                                                                |         |    |
|---------|-------------|-------------|----------|-------------------|-----------------------------------------------------------|----------------------------------------------------------------|---------|----|
| YPO1398 | 0.000989579 | 0.019298639 | -2.07321 | <i>cspB</i>       | Cold shock-like protein                                   | Adaptions and atypical conditions                              | COG1278 | K  |
| YPO1630 | 0.023468148 | 0.039017462 | -2.08819 | <i>cobB</i>       | Putative Sir2 family protein                              | Unknown                                                        | COG0846 | K  |
| yscF    | 0.000351924 | 0.016712285 | -2.08966 | <i>yscF</i>       |                                                           |                                                                |         |    |
| YPO2010 | 0.006994328 | 0.031365063 | -2.09049 | <i>yhcF</i>       | Conserved hypothetical protein                            | Unknown                                                        | COG0012 | J  |
| YPO1186 | 0.022168828 | 0.038728348 | -2.09154 |                   | Conserved hypothetical protein                            | Unknown                                                        |         |    |
| YPO0951 | 0.004756416 | 0.027776406 | -2.09887 |                   | Putative methyltransferase                                | RNA synthesis, RNA modification and DNA transcription          | COG0220 | R  |
| YPO2772 | 0.01933607  | 0.037222679 | -2.10876 | <i>purF</i>       | Amidophosphoribosyltransferase                            | Purine ribonucleotide biosynthesis                             | COG0034 | F  |
| YPO1301 | 0.004790602 | 0.027776406 | -2.11066 | <i>psaE</i>       | Putative regulatory protein                               | Broad regulatory functions                                     | COG0745 | TK |
| YPO3190 | 0.031771005 | 0.04267005  | -2.11129 | <i>yajC</i>       | Putative membrane protein                                 | Membranes, lipoproteins and porins                             | COG1862 | U  |
| YPO3903 | 0.002353529 | 0.021602417 | -2.13038 |                   | Conserved hypothetical protein                            | Unknown                                                        | COG3085 | S  |
| YPO3365 | 0.0006694   | 0.017718588 | -2.15588 | <i>cysN</i>       | Sulfate adenylyltransferase subunit 1                     | Sulphur metabolism                                             | COG2895 | P  |
| YPO2648 | 0.009262801 | 0.032645574 | -2.1561  | <i>nrdF</i>       | Ribonucleoside-diphosphate reductase 2 beta chain         | Sugar nucleotides metabolism                                   | COG0208 | F  |
| YPO2295 | 0.035515509 | 0.044715087 | -2.16517 |                   | Halooxid dehalogenase-like hydrolase family protein       | Unknown                                                        | COG1011 | R  |
| YPO3563 | 0.036022167 | 0.044927135 | -2.18497 | <i>rplM</i>       | 5S ribosomal protein L13                                  | Ribosomal protein synthesis and modification                   | COG0102 | J  |
| YPO0934 | 0.035066603 | 0.044591162 | -2.18737 |                   | Conserved hypothetical protein                            | Unknown                                                        | COG1385 | S  |
| YPO3373 | 0.027081609 | 0.040256329 | -2.19241 | <i>ygcM</i>       | Putative 6-pyruvoyl tetrahydrobiopterin synthase family p | Unknown                                                        | COG0720 | H  |
| YPO1412 | 0.001150328 | 0.019298639 | -2.19482 | <i>asnS, ts</i>   | Asparaginyl-tRNA synthetase                               | Aminoacyl tRNA synthetases and their modification              | COG0017 | J  |
| YPO1430 | 0.014981598 | 0.034956394 | -2.20296 | <i>fabA</i>       | 3-hydroxydecanoyl-[acyl-carrier-protein] dehydratase      | Fatty acid biosynthesis                                        | COG0764 | I  |
| YPO1744 | 0.006047137 | 0.030310453 | -2.20406 | <i>pagP</i>       | Putative exported protein                                 | Membranes, lipoproteins and porins                             |         |    |
| YPO2922 | 0.048678252 | 0.049169718 | -2.20869 |                   | Putative membrane protein                                 | Membranes, lipoproteins and porins                             | COG0741 | M  |
| YPO1370 | 0.009368907 | 0.032645574 | -2.2098  | <i>infA</i>       | Translation initiation factor IF-1                        | Protein translation and modification                           | COG0361 | J  |
| YPO1445 | 0.043432821 | 0.047599667 | -2.21068 |                   | Conserved hypothetical protein                            | Unknown                                                        | COG1092 | R  |
| YPO1264 | 0.00834474  | 0.032332443 | -2.21112 | <i>rplY</i>       | 5S ribosomal protein L25                                  | Ribosomal protein synthesis and modification                   | COG1825 | J  |
| YPO2637 | 0.000906778 | 0.019104257 | -2.24207 |                   | Conserved hypothetical protein                            | Unknown                                                        |         |    |
| fruA    | 0.015648502 | 0.034956394 | -2.24364 | <i>fruA, pt</i>   | PTS system, fructose-specific IIBC component              | Transport/binding Carbohydrates,organic acids and alcohols     |         |    |
| YPO3499 | 0.013794029 | 0.034757824 | -2.25173 | <i>secG</i>       | Protein-export membrane protein                           | Transport/binding proteins                                     | COG1314 | U  |
| YPO1261 | 0.035131222 | 0.044591162 | -2.25624 |                   | Conserved hypothetical protein                            | Unknown                                                        | COG3082 | S  |
| YPO1312 | 0.000972781 | 0.019298639 | -2.25963 | <i>yiuC</i>       | Putative siderophore ABC transporter, ATP-binding subun   | Transport/binding proteins                                     | COG1120 | PH |
| YPO0472 | 0.043903735 | 0.047957484 | -2.27254 | <i>rpsT, b23S</i> | ribosomal protein S2                                      | Ribosomal protein synthesis and modification                   | COG0268 | J  |
| YPO0936 | 0.016953863 | 0.035522094 | -2.2947  |                   | Conserved hypothetical protein                            | Unknown                                                        | COG1678 | K  |
| YPO3366 | 0.000366854 | 0.016802858 | -2.29745 | <i>cysD</i>       | Sulfate adenylyltransferase subunit 2                     | Sulphur metabolism                                             | COG0175 | EH |
| YPO0220 | 0.038158626 | 0.045350365 | -2.29768 | <i>rplN</i>       | 5S ribosomal protein L14                                  | Ribosomal protein synthesis and modification                   | COG0093 | J  |
| yscE    | 7.36819E-05 | 0.009786994 | -2.3032  | <i>yscE</i>       |                                                           |                                                                |         |    |
| YPO0155 | 0.014865093 | 0.034956394 | -2.30689 | <i>rpe</i>        | Ribulose-phosphate 3-epimerase                            | Degradation of Polysaccharides                                 | COG0036 | G  |
| YPO3212 | 0.01311299  | 0.034490359 | -2.31081 | <i>rdgC</i>       | Recombination associated protein RdgC                     | DNA replication, restriction/modification, recombination and r | COG2974 | L  |
| YPO2649 | 0.011435503 | 0.03357332  | -2.32914 | <i>nrdE</i>       | Ribonucleoside-diphosphate reductase 2 alpha chain        | Sugar nucleotides metabolism                                   | COG0209 | F  |
| YPO3294 | 0.046304518 | 0.048690731 | -2.32914 | <i>rimM</i>       | 16S rRNA processing protein                               | Ribosome maturation and modification                           | COG0806 | J  |
| YPO4102 | 0.035266951 | 0.044591162 | -2.33101 | <i>yidC</i>       | Probable membrane protein                                 | Membranes, lipoproteins and porins                             | COG0706 | U  |
| YPO2416 | 0.035275458 | 0.044591162 | -2.33451 |                   | Putative membrane protein                                 | Membranes, lipoproteins and porins                             | COG2076 | P  |
| YPO0417 | 0.013134322 | 0.034490359 | -2.34762 | <i>waaL</i>       | Putative O-antigen biosynthesis protein                   | Membranes, lipoproteins and porins                             | COG3307 | M  |
| YPO1435 | 0.012286264 | 0.034349747 | -2.3509  | <i>ompA, t</i>    | Putative outer membrane porin A protein                   | Cell envelop                                                   | COG2885 | M  |
| YPO3159 | 0.048912162 | 0.049286019 | -2.35891 |                   | Hypothetical protein                                      | Unknown                                                        |         |    |
| YPO4101 | 0.046453383 | 0.048690731 | -2.39408 | <i>rnpA</i>       | Ribonuclease P protein                                    | Degradation of RNA                                             | COG0594 | J  |
| YPO3295 | 0.034393484 | 0.044527354 | -2.41959 | <i>rpsP</i>       | 3S ribosomal protein S16                                  | Ribosomal protein synthesis and modification                   | COG0228 | J  |
| YPO3367 | 0.000170902 | 0.013938223 | -2.42614 | <i>cysG</i>       | Siroheme synthase                                         | Heme and porphyrin Biosynthesis                                | COG0007 | H  |
| YPO0416 | 0.013145784 | 0.034490359 | -2.42808 | <i>rfaQ, wa</i>   | Putative lipopolysaccharide core biosynthesis protein     | Surface polysaccharides, lipopolysaccharides and antigens      | COG0859 | M  |
| YPO2013 | 0.039662875 | 0.046539987 | -2.43075 | <i>prsA, pi</i>   | Ribose-phosphate pyrophosphokinase                        | Sugar nucleotides metabolism                                   | COG0462 | FE |
| yscK    | 0.002722711 | 0.022752142 | -2.43635 | <i>yscK</i>       |                                                           |                                                                |         |    |
| YPO4082 | 0.015311202 | 0.034956394 | -2.44929 | <i>avtA</i>       | Valine--pyruvate aminotransferase                         | Pyruvate family biosynthesis                                   | COG0436 | E  |
| YPO1298 | 0.048245066 | 0.04891816  | -2.45199 | <i>fruB, fri</i>  | Bifunctional fructose-specific PTS IIA/HPr protein        | Transport/binding Carbohydrates,organic acids and alcohols     | COG1762 | GT |
| YPO3748 | 0.030104955 | 0.041948654 | -2.45543 | <i>rplL</i>       | 5S ribosomal protein L7,L12                               | Ribosomal protein synthesis and modification                   | COG0222 | J  |

|         |             |             |          |                   |                                                          |                                                             |         |     |
|---------|-------------|-------------|----------|-------------------|----------------------------------------------------------|-------------------------------------------------------------|---------|-----|
| YPO3644 | 0.023963461 | 0.039017462 | -2.46231 | <i>cspA1</i>      | Major cold shock protein Cspa1                           | Adaptions and atypical conditions                           | COG1278 | K   |
| yscD    | 5.31127E-07 | 0.000705483 | -2.46502 | -1.95 <i>yscD</i> |                                                          |                                                             |         |     |
| YPO0234 | 0.046638807 | 0.048690731 | -2.47218 | <i>rpoA</i>       | DNA-directed RNA polymerase alpha chain                  | RNA synthesis, RNA modification and DNA transcription       | COG0202 | K   |
| YPO1715 | 0.017757074 | 0.036119915 | -2.55027 | <i>ybjR, bδ</i>   | Probable N-acetylmuramoyl-L-alanine amidase              | Degradation of Proteins, peptides and glycopeptides         | COG3023 | V   |
| YPO1313 | 0.000245788 | 0.016712285 | -2.55921 | <i>yiU</i>        | Putative outer membrane protein                          | Cell envelop                                                | COG1629 | P   |
| YPO1395 | 0.024877899 | 0.039115715 | -2.56434 | <i>msbA</i>       | Probable transport ATP-binding protein                   | Transport/binding proteins                                  | COG1132 | V   |
| YPO1537 | 0.000544383 | 0.01725695  | -2.56819 | <i>ysuR</i>       | Putative iron-siderophore receptor                       | Iron uptake                                                 | COG1629 | P   |
| yscB    | 0.014785636 | 0.034956394 | -2.56844 | <i>yscB</i>       |                                                          |                                                             |         |     |
| YPO3173 | 0.035653121 | 0.044730947 | -2.58261 | <i>thiI</i>       | Thiamine biosynthesis protein                            | Thiamine Biosynthesis                                       | COG0301 | H   |
| YPO0467 | 0.012356363 | 0.034349747 | -2.58778 | <i>yaaH</i>       | Putative membrane protein                                | Membranes, lipoproteins and porins                          | COG1584 | S   |
| YPO3158 | 0.027900444 | 0.04071882  | -2.59218 | <i>tig</i>        | Trigger factor                                           | Cell division                                               | COG0544 | O   |
| YPO0956 | 0.030900134 | 0.04228564  | -2.61876 |                   | Putative hydroxamate-type ferrisiderophore receptor      | Iron uptake                                                 | COG1629 | P   |
| YPO3751 | 0.029189161 | 0.041422305 | -2.62505 | <i>rplK, re</i>   | 5S ribosomal protein L11                                 | Ribosomal protein synthesis and modification                | COG0080 | J   |
| YPO0481 | 0.032779239 | 0.043409665 | -2.63399 | <i>carA, py</i>   | Carbamoyl-phosphate synthase small chain                 | Glutamate family biosynthesis                               | COG0505 | EF  |
| YPO2441 | 0.013637551 | 0.034748073 | -2.639   | <i>yfeC</i>       | Chelated iron transport system membrane protein          | Transport/binding Cations                                   | COG1108 | P   |
| YPO2650 | 0.009100456 | 0.032645574 | -2.64587 | <i>nrdI</i>       | NrdI protein homologue                                   | Unknown                                                     | COG1780 | F   |
| YPO3536 | 0.009670224 | 0.032670333 | -2.66499 | <i>rplI</i>       | 5S ribosomal protein L9                                  | Ribosomal protein synthesis and modification                | COG0359 | J   |
| YPO1045 | 0.047544892 | 0.048838565 | -2.67139 | <i>tsf</i>        | Elongation factor Ts                                     | Protein translation and modification                        | COG0264 | J   |
| YPO3225 | 0.003563966 | 0.025248501 | -2.67888 | <i>gpt, gpy</i>   | Xanthine-guanine phosphoribosyltransferase               | Salvage of nucleosides and nucleotides                      | COG0503 | F   |
| YPO3666 | 0.017200964 | 0.035559502 | -2.68989 | <i>mreC</i>       | Rod shape-determining protein MreC                       | Murein sacculus and peptidoglycan                           | COG1792 | M   |
| YPO3749 | 0.020226374 | 0.037786523 | -2.69689 | <i>rplJ</i>       | 5S ribosomal protein L1                                  | Ribosomal protein synthesis and modification                | COG0244 | J   |
| YPO2439 | 0.029356949 | 0.041483135 | -2.71502 | <i>yfeA</i>       | Periplasmic-binding protein                              | Transport/binding Cations                                   | COG0803 | P   |
| YPO3562 | 0.039120768 | 0.046066665 | -2.75027 | <i>rpsI</i>       | 3S ribosomal protein S9                                  | Ribosomal protein synthesis and modification                | COG0103 | J   |
| yscC    | 0.008541071 | 0.032332443 | -2.75385 | <i>yscC</i>       |                                                          |                                                             |         |     |
| rpsC    | 0.03566281  | 0.044730947 | -2.76047 | <i>rpsC</i>       | 3S ribosomal protein S3                                  | Ribosomal protein synthesis and modification                |         |     |
| YPO3643 | 0.015945856 | 0.035233071 | -2.81032 | <i>cspa2</i>      | Major cold shock protein Cspa2                           | Adaptions and atypical conditions                           | COG1278 | K   |
| YPO3510 | 0.045054572 | 0.048300993 | -2.82611 |                   | Putative membrane protein                                | Membranes, lipoproteins and porins                          | COG0697 | GER |
| YPO3292 | 0.046963948 | 0.048690731 | -2.83346 | <i>rplS</i>       | 5S ribosomal protein L19                                 | Ribosomal protein synthesis and modification                | COG0335 | J   |
| YPO1655 | 0.033827732 | 0.044199211 | -2.84482 | <i>cspC, m</i>    | Cold shock protein                                       | Adaptions and atypical conditions                           | COG1278 | K   |
| rnpA    | 0.040388806 | 0.046843737 | -2.8528  | <i>rnpA</i>       | Ribonuclease P protein                                   | Degradation of RNA                                          |         |     |
| YPO1044 | 0.037291847 | 0.045277774 | -2.85508 | <i>rpsB</i>       | 3S ribosomal protein S2                                  | Ribosomal protein synthesis and modification                | COG0052 | J   |
| YPO2757 | 0.00546589  | 0.029730694 | -2.91859 | <i>fabB, fa</i>   | 3-oxoacyl-[acyl-carrier-protein] synthase I              | Fatty acid biosynthesis                                     | COG0304 | IQ  |
| YPO3750 | 0.031318079 | 0.042361578 | -2.93909 | <i>rplA</i>       | 5S ribosomal protein L1                                  | Ribosomal protein synthesis and modification                | COG0081 | J   |
| YPO2506 | 0.002005618 | 0.021336704 | -2.9488  | <i>ompX, c</i>    | Putative outer membrane protein                          | Cell envelop                                                | COG2885 | M   |
| YPO0003 | 0.001487025 | 0.019849387 | -3.03436 | <i>asnA</i>       | Aspartate-ammonia ligase                                 | Aspartate family biosynthesis                               | COG2502 | E   |
| rplK    | 0.030324122 | 0.041957104 | -3.05048 | <i>rplK, re</i>   | 5S ribosomal protein L11                                 | Ribosomal protein synthesis and modification                |         |     |
| YPO2442 | 0.022445435 | 0.038972215 | -3.05751 | <i>yfeD</i>       | Chelated iron transport system membrane protein          | Transport/binding Cations                                   | COG1108 | P   |
| YPO2440 | 0.013663002 | 0.034748073 | -3.06179 | <i>yfeB</i>       | ATP-binding transport protein                            | Transport/binding Cations                                   | COG1121 | P   |
| YPO3293 | 0.028699818 | 0.040972496 | -3.06516 | <i>trmD</i>       | tRNA (guanine-N1)-methyltransferase                      | Aminoacyl tRNA synthetases and their modification           | COG0336 | J   |
| YPO1743 | 0.004862446 | 0.027776406 | -3.08176 | <i>aroP</i>       | Aromatic amino acid transport protein                    | Transport/binding Amino acids and amines                    | COG1113 | E   |
| sysE    | 0.000225955 | 0.016673944 | -3.17053 | <i>sysE</i>       | Putative yopE chaperone                                  |                                                             |         |     |
| YPO1300 | 0.01261581  | 0.034409208 | -3.24852 | <i>fruA, pt</i>   | PTS system, fructose-specific IIBC component             | Transport/binding Carbohydrates, organic acids and alcohols | COG1299 | G   |
| YPO0218 | 0.026169253 | 0.039943498 | -3.26187 | <i>rpmC</i>       | 5S ribosomal protein L29                                 | Ribosomal protein synthesis and modification                | COG0255 | J   |
| YPO1299 | 0.040907758 | 0.046904392 | -3.27003 | <i>fruK, fp</i>   | 1-phosphofructokinase                                    | Glycolysis                                                  | COG1105 | G   |
| YPO3512 | 0.040130865 | 0.046773956 | -3.36255 | <i>rplU</i>       | 5S ribosomal protein L21                                 | Ribosomal protein synthesis and modification                | COG0261 | J   |
| YPO1310 | 0.013044161 | 0.034490359 | -3.42945 | <i>yiU</i>        | Putative periplasmic substrate-binding transport protein | Transport/binding proteins                                  | COG0614 | P   |
| YPO1311 | 0.015994818 | 0.035233071 | -3.44733 | <i>yiU</i>        | Putative FecCD-family membrane transport protein         | Transport/binding proteins                                  | COG0609 | P   |
| YPO0216 | 0.04159594  | 0.047022052 | -3.47155 | <i>rpsC</i>       | 3S ribosomal protein S3                                  | Ribosomal protein synthesis and modification                | COG0092 | J   |
| YPO3511 | 0.034763938 | 0.044591162 | -3.47676 | <i>rpmA</i>       | 5S ribosomal protein L27                                 | Ribosomal protein synthesis and modification                | COG0211 | J   |
| YPO0645 | 0.02332367  | 0.039017462 | -3.48407 | <i>rpsU</i>       | 3S ribosomal protein S21                                 | Ribosomal protein synthesis and modification                | COG0828 | J   |
| YPO0219 | 0.010206434 | 0.03304557  | -3.56762 | <i>rpsQ, m</i>    | 3S ribosomal protein S17                                 | Ribosomal protein synthesis and modification                | COG0186 | J   |

|         |             |             |          |                  |                                                          |                                                                |         |   |
|---------|-------------|-------------|----------|------------------|----------------------------------------------------------|----------------------------------------------------------------|---------|---|
| YPO3538 | 0.048210928 | 0.04891816  | -3.56834 | <i>priB</i>      | Primosomal replication protein n                         | DNA replication, restriction/modification, recombination and r | COG2965 | L |
| YPO1649 | 0.000178389 | 0.013938223 | -3.68106 |                  | Conserved hypothetical protein                           | Unknown                                                        | COG1566 | V |
| YPO3537 | 0.042912358 | 0.047359741 | -3.71137 | <i>rpsR</i>      | 3S ribosomal protein S18                                 | Ribosomal protein synthesis and modification                   | COG0238 | J |
| YPO1078 | 0.018743336 | 0.036558493 | -3.73034 | <i>mltD, dl</i>  | Membrane-bound lytic murein transglycosylase D precursor | Murein sacculus and peptidoglycan                              | COG0741 | M |
| YPO3539 | 0.047923141 | 0.048914567 | -3.74342 | <i>rpsF</i>      | 3S ribosomal protein S6                                  | Ribosomal protein synthesis and modification                   | COG0360 | J |
| YPO0215 | 0.046500398 | 0.048690731 | -4.09432 | <i>rplV, erj</i> | 5S ribosomal protein L22                                 | Ribosomal protein synthesis and modification                   | COG0091 | J |
| YPO0217 | 0.026582151 | 0.040036778 | -4.39998 | <i>rplP</i>      | 5S ribosomal protein L16                                 | Ribosomal protein synthesis and modification                   | COG0197 | J |
| YPO0211 | 0.046395976 | 0.048690731 | -4.81194 | <i>rplD, er</i>  | 5S ribosomal protein L4                                  | Ribosomal protein synthesis and modification                   | COG0088 | J |

\* FC = Fold Change
