# Supplementary material
Source: PubMed Central journal article supplement (PMC3811820)
Supplement: IAI.00880-13_zii999090360so3.pdf [file IAI.00880-13_zii999090360so3.pdf]

Table S3. Significant differentially expressed genes ( $p < 0.05$ ; FC\*  $> 1.5$ ): R88 treated vs R88 AI-2 untreated, 37°C.

| ID      | <i>p</i> value | <i>q</i> value | FC       | qRT-PCR | Gene                         | Gene function                                      | Process                                                    | COG     | COG function categories |
|---------|----------------|----------------|----------|---------|------------------------------|----------------------------------------------------|------------------------------------------------------------|---------|-------------------------|
| YPO4086 | 0.004658066    | 0.159506831    | 1.715835 | 2.21    |                              | Putative lipoprotein                               | Membranes, lipoproteins and porins                         |         |                         |
| YPO1828 | 0.028092755    | 0.233063202    | 1.525161 |         | <i>fliH, fla BIII, fla A</i> | Flagellar assembly protein FliH                    | Chemotaxis and mobility                                    | COG1317 | NU                      |
| YPO0285 | 0.000165303    | 0.056605044    | -1.50757 |         |                              | Conserved hypothetical protein                     | Unknown                                                    |         |                         |
| YPO3518 | 0.022173535    | 0.213040384    | -1.51301 |         |                              | Putative exported protein                          | Membranes, lipoproteins and porins                         | COG0214 | H                       |
| YPO0295 | 0.000298356    | 0.072559933    | -1.52776 |         | <i>terA</i>                  | Putative tellurite resistance protein              | Drug/analogue sensitivity                                  | COG2310 | T                       |
| YPO0292 | 0.004568822    | 0.158887026    | -1.53818 |         |                              | Conserved hypothetical protein                     | Unknown                                                    |         |                         |
| YPO2855 | 0.013920316    | 0.193296993    | -1.53941 |         |                              | Putative protease                                  | Degradation of Proteins, peptides and glycopeptides        | COG0826 | O                       |
| terA    | 0.000324803    | 0.072559933    | -1.56612 |         | <i>terA</i>                  | Putative tellurite resistance protein              | Drug/analogue sensitivity                                  |         |                         |
| YPO1383 | 0.011113428    | 0.191141134    | -1.57491 |         | <i>pflB, pfl</i>             | Formate acetyltransferase 1                        | Anaerobic respiration                                      | COG1882 | C                       |
| YPO3454 | 0.004381917    | 0.158887026    | -1.61656 |         | <i>nrdD</i>                  | Anaerobic ribonucleoside-triphosphate reductase    | 2 -deoxyribonucleotide biosynthesis                        | COG1328 | F                       |
| YPO3786 | 0.000344331    | 0.072559933    | -1.62515 |         | <i>udp</i>                   | Uridine phosphorylase                              | Salvage of nucleosides and nucleotides                     | COG2820 | F                       |
| YPO1512 | 0.014758559    | 0.193296993    | -1.63101 |         | <i>cdd</i>                   | Cytidine deaminase                                 | Salvage of nucleosides and nucleotides                     | COG0295 | F                       |
| YPO1304 | 0.00161006     | 0.145277514    | -1.69029 |         | <i>psaB</i>                  | Chaperone protein PsaB precursor                   | Chaperones, chaperonins, heat shock                        | COG3121 | NU                      |
| YPO1307 | 0.000424341    | 0.073287293    | -1.69605 |         |                              | Putative membrane protein                          | Membranes, lipoproteins and porins                         | COG2855 | S                       |
| ompC    | 0.018767438    | 0.204017789    | -1.74124 |         | <i>ompC, meoA, par</i>       | Outer membrane protein C, porin                    | Cell envelop                                               |         |                         |
| YPO0293 | 0.00587751     | 0.162871375    | -1.76156 |         |                              | Conserved hypothetical protein                     | Unknown                                                    |         |                         |
| YPO0284 | 0.001067248    | 0.120900811    | -1.7889  |         |                              | Conserved hypothetical protein                     | Unknown                                                    | COG0702 | MG                      |
| YPO0276 | 0.008402046    | 0.174475422    | -1.79176 |         |                              | Putative LysR-family transcriptional regulator     | Broad regulatory functions                                 | COG0583 | K                       |
| YPO2693 | 0.00734691     | 0.163670303    | -1.85688 |         | <i>ybfA</i>                  | Putative membrane protein                          | Membranes, lipoproteins and porins                         | COG0628 | R                       |
| YPO1298 | 0.002276456    | 0.145277514    | -1.90522 |         | <i>fruB, fruF, fpr</i>       | Bifunctional fructose-specific PTS IIA/HPr protein | Transport/binding Carbohydrates,organic acids and alcoho   | COG1762 | GT                      |
| YPO1222 | 0.003901307    | 0.158887026    | -1.94352 |         | <i>ompC, meoA, par</i>       | Outer membrane protein C, porin                    | Cell envelop                                               | COG3203 | M                       |
| fruA    | 0.009707368    | 0.17861306     | -1.98457 |         | <i>fruA, ptsF</i>            | PTS system, fructose-specific IIBC component       | Transport/binding Carbohydrates,organic acids and alcohols |         |                         |
| YPO0286 | 0.002492486    | 0.145277514    | -1.98576 |         |                              | Putative coproporphyrinogen III oxidase            | Heme and porphyrin Biosynthesis                            | COG0635 | H                       |
| YPO1300 | 0.008130419    | 0.171898598    | -2.01013 |         | <i>fruA, ptsF</i>            | PTS system, fructose-specific IIBC component       | Transport/binding Carbohydrates,organic acids and alcoho   | COG1299 | G                       |
| YPO2012 | 0.004051819    | 0.158887026    | -2.04419 |         |                              | Putative membrane protein                          | Membranes, lipoproteins and porins                         |         |                         |
| YPO1299 | 0.005868601    | 0.162871375    | -2.11404 |         | <i>fruK, fpk</i>             | 1-phosphofructokinase                              | Glycolysis                                                 | COG1105 | G                       |
| YPO1303 | 0.000372753    | 0.072938539    | -2.14384 | -2.44   | <i>psaA</i>                  | pH 6 antigen precursor (antigen 4) (adhesin)       | Surface polysaccharides, lipopolysaccharides and antigens  |         |                         |
| focA    | 0.000725086    | 0.104544025    | -2.16799 |         | <i>focA</i>                  | Putative formate transporter 1                     | Transport/binding Carbohydrates,organic acids and alcohols |         |                         |
| YPO2705 | 0.000164739    | 0.056605044    | -2.2646  |         |                              | Conserved hypothetical protein                     | Unknown                                                    | COG3445 | R                       |
| YPO1384 | 2.28847E-06    | 0.006269157    | -2.31012 |         | <i>focA</i>                  | Putative formate transporter 1                     | Transport/binding Carbohydrates,organic acids and alcoho   | COG2116 | P                       |
| YPO1661 | 0.007309608    | 0.163670303    | -2.71475 |         | <i>mgB</i>                   | Mg(2+) transport ATPase protein B                  | Pathogenicity                                              | COG0474 | P                       |
| YPO3279 | 8.54569E-06    | 0.011705253    | -3.36121 | -4.9    | <i>yfiA</i>                  | Putative sigma 54 modulation protein               | Broad regulatory functions                                 | COG1544 | J                       |

\* FC = Fold Change
