# Supplementary material
Source: PubMed Central journal article supplement (PMC3811820)
Supplement: IAI.00880-13_zii999090360so4.pdf [file IAI.00880-13_zii999090360so4.pdf]

Table S4. Significant differentially expressed genes ( $p < 0.05$ ;  $FC^* > 1.5$ ): R88 treated vs R88 AI-2 and AHLs untreated, 37°C.

| ID      | <i>p</i> value | <i>q</i> value | FC       | qRT-PCR | Gene                  | Gene function                                      | Process                                                    | COG     | COG function categories |
|---------|----------------|----------------|----------|---------|-----------------------|----------------------------------------------------|------------------------------------------------------------|---------|-------------------------|
| YPO3954 | 0.002285581    | 0.172345563    | 2.639792 |         | <i>gntI, usgA, g</i>  | Putative gluconate permease                        | Transport/binding Carbohydrates,organic acids and alcohol  | COG2610 | GE                      |
| fruA    | 0.001035183    | 0.149305096    | 2.568186 |         | <i>fruA, ptsF</i>     | PTS system, fructose-specific IIBC component       | Transport/binding Carbohydrates,organic acids and alcohols |         |                         |
| YPO1299 | 0.002544894    | 0.172345563    | 2.559725 | 2.96    | <i>fruK, fpk</i>      | 1-phosphofructokinase                              | Glycolysis                                                 | COG1105 | G                       |
| YPO3953 | 0.0001616      | 0.117718871    | 2.394082 |         |                       | Putative gluconokinase                             | Degradation of carbon compounds                            | COG3265 | G                       |
| YPO1298 | 0.001743415    | 0.159979859    | 2.245886 |         | <i>fruB, fruF, fp</i> | Bifunctional fructose-specific PTS IIA/HPr protein | Transport/binding Carbohydrates,organic acids and alcohol  | COG1762 | GT                      |
| YPO1300 | 0.003666333    | 0.181747668    | 2.158039 |         | <i>fruA, ptsF</i>     | PTS system, fructose-specific IIBC component       | Transport/binding Carbohydrates,organic acids and alcohol  | COG1299 | G                       |
| YPO3644 | 0.00456205     | 0.191937387    | 2.090911 |         | <i>cspa1</i>          | Major cold shock protein Cspa1                     | Adaptions and atypical conditions                          | COG1278 | K                       |
| YPO1994 | 0.005104302    | 0.192240271    | 2.062667 |         |                       | Hypothetical protein                               | Unknown                                                    |         |                         |
| YPO3643 | 0.000338717    | 0.149305096    | 2.029521 |         | <i>cspa2</i>          | Major cold shock protein Cspa2                     | Adaptions and atypical conditions                          | COG1278 | K                       |
| YPO0003 | 0.006498704    | 0.207919903    | 2.006115 |         | <i>asnA</i>           | Aspartate-ammonia ligase                           | Aspartate family biosynthesis                              | COG2502 | E                       |
| YPO1993 | 0.030901545    | 0.272926836    | 1.991723 |         |                       | Putative dehydrogenase                             | Unknown                                                    | COG1028 | IQR                     |
| YPO1222 | 1.24692E-05    | 0.038941811    | 1.972102 |         | <i>ompC, meoA</i>     | Outer membrane protein C, porin                    | Cell envelop                                               | COG3203 | M                       |
| ompC    | 0.002095443    | 0.172214519    | 1.894964 |         | <i>ompC, meoA</i>     | Outer membrane protein C, porin                    | Cell envelop                                               |         |                         |
| YPO2659 | 0.02018705     | 0.269745289    | 1.776597 |         | <i>cspB</i>           | Cold shock protein                                 | Adaptions and atypical conditions                          | COG1278 | K                       |
| YPO1659 | 0.007923744    | 0.221321263    | 1.721679 |         |                       | Hypothetical protein                               | Unknown                                                    | COG1028 | IQR                     |
| YPO1301 | 0.007902523    | 0.221321263    | 1.670796 | 2.09    | <i>psaE</i>           | Putative regulatory protein                        | Broad regulatory functions                                 | COG0745 | TK                      |
| YPO1995 | 0.02564657     | 0.272926836    | 1.661964 |         |                       | Hypothetical protein                               | Unknown                                                    |         |                         |
| YPO4064 | 0.002657749    | 0.172345563    | 1.649216 |         |                       | Hypothetical protein                               | Unknown                                                    |         |                         |
| pla     | 0.000188468    | 0.117718871    | 1.639186 | 3.04    | <i>pla</i>            |                                                    |                                                            |         |                         |
| YPO1618 | 0.011300444    | 0.243342439    | 1.603999 |         |                       | Hypothetical protein                               | Unknown                                                    | COG1028 | IQR                     |
| YPO1398 | 0.000452953    | 0.149305096    | 1.598395 |         | <i>cspB</i>           | Cold shock-like protein                            | Adaptions and atypical conditions                          | COG1278 | K                       |
| YPO1435 | 0.009704892    | 0.237066633    | 1.570666 |         | <i>ompA, tolG, t</i>  | Putative outer membrane porin A protein            | Cell envelop                                               | COG2885 | M                       |
| YPO2180 | 0.000877937    | 0.149305096    | 1.555349 |         | <i>adhE, ana</i>      | Aldehyde-alcohol dehydrogenase                     | Fermentation                                               | COG1012 | C                       |
| YPO3901 | 0.014515089    | 0.25814246     | 1.538026 |         | <i>ilvG</i>           | Acetolactate synthase isozyme II large subunit     | Pyruvate family biosynthesis                               | COG0028 | EH                      |
| YPO0630 | 0.028558296    | 0.272926836    | 1.526076 |         |                       | Conserved hypothetical protein                     | Unknown                                                    | COG3531 | O                       |
| YPO4084 | 0.010968843    | 0.243342439    | 1.50471  |         | <i>ibpB, hslS, hf</i> | Heat shock protein                                 | Adaptions and atypical conditions                          | COG0071 | O                       |
| YPO0992 | 0.01691141     | 0.263207317    | -1.52364 |         | <i>iucC</i>           | Putative siderophore biosynthesis protein IucC     | Iron uptake                                                |         |                         |
| YPO0800 | 0.007937132    | 0.221321263    | -1.55909 |         |                       | Putative exported protein                          | Membranes, lipoproteins and porins                         | COG0491 | R                       |
| YPO1499 | 0.032334818    | 0.272926836    | -1.56174 |         |                       | Putative membrane protein                          | Membranes, lipoproteins and porins                         | COG0477 | GEPR                    |
| YPO3788 | 0.000930148    | 0.149305096    | -1.6284  |         | <i>metE</i>           | 5-methyltetrahydropteroyltriglutamate--homocyst e  | Aspartate family biosynthesis                              | COG0620 | E                       |

\* FC = Fold Change
