# Supplementary material
Source: PubMed Central journal article supplement (PMC3811820)
Supplement: IAI.00880-13_zii999090360so5.pdf [file IAI.00880-13_zii999090360so5.pdf]

Table S5. Significant genes ( $p < 0.05$ ,  $FC^* > 1.5$ ) at 37°C in all studies

| ID    | 30°C vs 37°C | 3 signals addition | $\Delta ypeIR$<br>$\Delta yspIR$<br>$\Delta luxS$ | AI-2 addition | $\Delta luxS$ | Gene         | Gene function                     | Process                                                             |
|-------|--------------|--------------------|---------------------------------------------------|---------------|---------------|--------------|-----------------------------------|---------------------------------------------------------------------|
| acnA  |              |                    |                                                   |               |               | <i>acnA</i>  | Aconitate hydratase 1             | Tricarboxylic acid cycle                                            |
| acpS  |              |                    |                                                   |               |               | <i>acpS</i>  | Holo-[acyl-carrier protein] synt  | Fatty acid biosynthesis                                             |
| agaY  |              |                    |                                                   |               |               | <i>agaY</i>  | Putative aldolase                 | Degradation of carbon compounds                                     |
| bfr   |              |                    |                                                   |               |               | <i>bfr</i>   | Bacterioferritin                  | Iron uptake                                                         |
| bglA  |              |                    |                                                   |               |               | <i>bglA</i>  | 6-phospho-beta-glucosidase        | Degradation of carbon compounds                                     |
| cafl  |              |                    |                                                   |               |               | <i>cafl</i>  | Putative F1 capsule antigen, caf  |                                                                     |
| caflA |              |                    |                                                   |               |               | <i>caflA</i> | Putative F1 capsule anchoring p   |                                                                     |
| caflM |              |                    |                                                   |               |               | <i>caflM</i> | Putative F1 chaperone protein, c  |                                                                     |
| caflR |              |                    |                                                   |               |               | <i>caflR</i> | Putative F1 operon positive regu  |                                                                     |
| cstA  |              |                    |                                                   |               |               | <i>cstA</i>  | Putative carbon starvation prote  | Adaptions and atypical conditions                                   |
| dctA  |              |                    |                                                   |               |               | <i>dctA</i>  | C4-dicarboxylate transport prot   | Transport/binding Carbohydrates,organic acids and alcohols          |
| dnaJ  |              |                    |                                                   |               |               | <i>dnaJ</i>  | Chaperone protein DnaJ            | Chaperones, chaperonins, heat shock                                 |
| exuT  |              |                    |                                                   |               |               | <i>exuT</i>  | ExuT transport protein            | Transport/binding Carbohydrates,organic acids and alcohols          |
| feoA  |              |                    |                                                   |               |               | <i>feoA</i>  | Hypothetical ferrous iron transp  | Unknown                                                             |
| focA  |              |                    |                                                   |               |               | <i>focA</i>  | Putative formate transporter 1    | Transport/binding Carbohydrates,organic acids and alcohols          |
| fruA  |              |                    |                                                   |               |               | <i>fruA</i>  | PTS system, fructose-specific II  | Transport/binding Carbohydrates,organic acids and alcohols          |
| gshA  |              |                    |                                                   |               |               | <i>gshA</i>  | Glutamate--cysteine ligase        | Thioredoxin Biosynthesis                                            |
| hmuS  |              |                    |                                                   |               |               | <i>hmuS</i>  | Hemin transport protein           | Transport/binding proteins                                          |
| hslR  |              |                    |                                                   |               |               | <i>hslR</i>  | Heat shock protein 15             | Adaptions and atypical conditions                                   |
| hutH  |              |                    |                                                   |               |               | <i>hutH</i>  | Histidine ammonia-lyase           | Degradation of amino acids                                          |
| ihfA  |              |                    |                                                   |               |               | <i>ihfA</i>  | Integration host factor alpha-sul | DNA replication, restriction/modification, recombination and repair |
| intA  |              |                    |                                                   |               |               | <i>intA</i>  | Phage integrase (partial)         |                                                                     |
| ipk   |              |                    |                                                   |               |               | <i>ipk</i>   | Putative 4-diphosphocytidyl-2-C   | Menaquinone and ubiquinone Biosynthesis                             |
| lcrD  |              |                    |                                                   |               |               | <i>lcrD</i>  |                                   | Low calcium response                                                |
| lcrF  |              |                    |                                                   |               |               | <i>lcrF</i>  |                                   | Low calcium response                                                |
| lcrG  |              |                    |                                                   |               |               | <i>lcrG</i>  | Antiphagocytosis                  | Low calcium response                                                |
| lcrH  |              |                    |                                                   |               |               | <i>lcrH</i>  |                                   | Low calcium response                                                |
| lcrR  |              |                    |                                                   |               |               | <i>lcrR</i>  |                                   | Low calcium response                                                |
| lcrV  |              |                    |                                                   |               |               | <i>lcrV</i>  | Antiphagocytosis                  | Low calcium response                                                |
| lpxD  |              |                    |                                                   |               |               | <i>lpxD</i>  | UDP-3-o-[3-hydroxymyristoyl]      | Surface polysaccharides, lipopolysaccharides and antigens           |
| malF  |              |                    |                                                   |               |               | <i>malF</i>  | Maltose transport system perme    | Maltose operon                                                      |
| malG  |              |                    |                                                   |               |               | <i>malG</i>  | Maltose transport system perme    | Maltose operon                                                      |
| malK  |              |                    |                                                   |               |               | <i>malK</i>  | Maltose,maltodextrin transport    | Maltose operon                                                      |
| metG  |              |                    |                                                   |               |               | <i>metG</i>  | Methionyl-tRNA synthetase         | Aminoacyl tRNA synthetases and their modification                   |
| msbA  |              |                    |                                                   |               |               | <i>msbA</i>  | Probable transport ATP-binding    | Transport/binding proteins                                          |

**Legend**

up-regulated in control 

down-regulated in control 

\* colors are reversed for AI-2 and three signal treatments

up-regulated in treated 

down-regulated in treated 

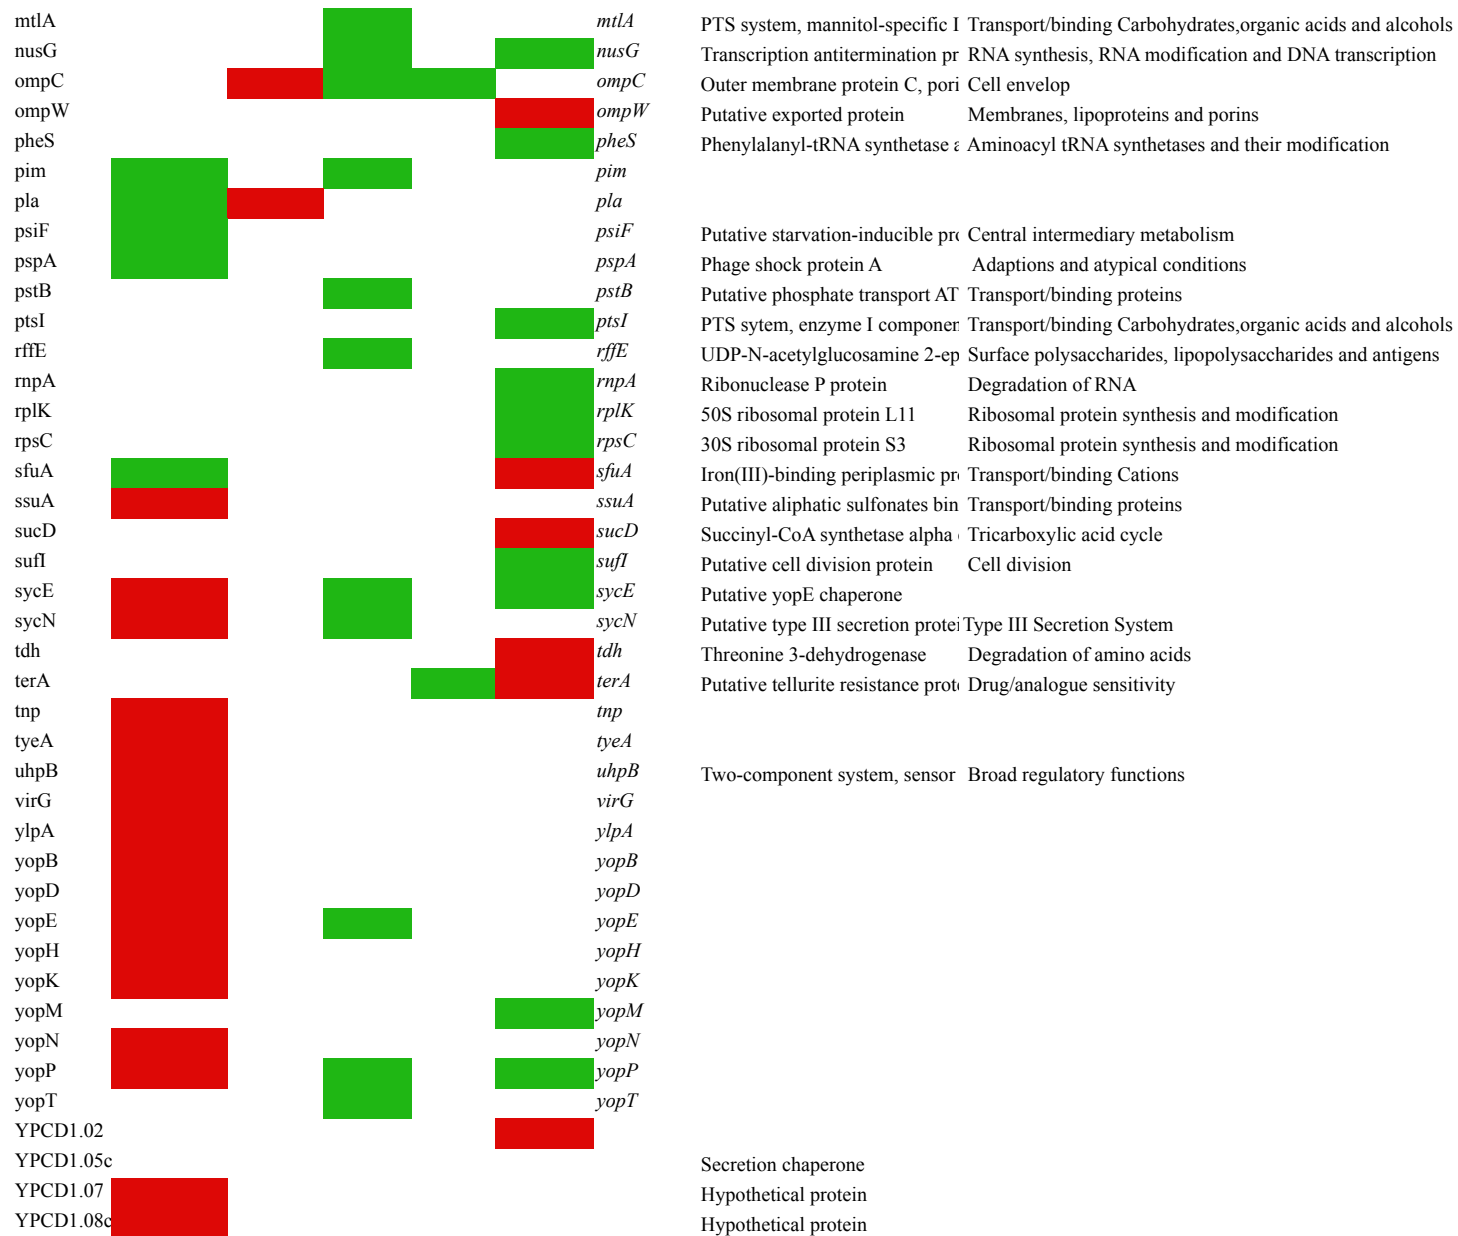

|             |  |  |  |                                 |                                                                                 |
|-------------|--|--|--|---------------------------------|---------------------------------------------------------------------------------|
| YPCD1.09c   |  |  |  | Hypothetical protein            |                                                                                 |
| YPCD1.14c   |  |  |  |                                 |                                                                                 |
| YPCD1.15c   |  |  |  | Hypothetical protein            |                                                                                 |
| YPCD1.16c   |  |  |  | Hypothetical protein            |                                                                                 |
| YPCD1.18c   |  |  |  |                                 |                                                                                 |
| YPCD1.23    |  |  |  | Hypothetical protein            |                                                                                 |
| YPCD1.31c   |  |  |  | Secreted Effector Protein       |                                                                                 |
| YPCD1.40    |  |  |  | Type III Secretion System Atpa  |                                                                                 |
| YPCD1.50    |  |  |  | <i>yscA</i>                     | Hypothetical Protein                                                            |
| YPCD1.51    |  |  |  | <i>yscB</i>                     | Type III Secretion Apparatus Cc Type III Secretion System                       |
| YPCD1.52    |  |  |  |                                 |                                                                                 |
| YPCD1.69    |  |  |  |                                 |                                                                                 |
| YPCD1.73c   |  |  |  | Hypothetical Protein            |                                                                                 |
| YPCD1.75c   |  |  |  |                                 |                                                                                 |
| YPCD1.81    |  |  |  |                                 |                                                                                 |
| YPCD1.82c   |  |  |  |                                 |                                                                                 |
| YPCD1.83c   |  |  |  |                                 |                                                                                 |
| YPCD1.85    |  |  |  |                                 |                                                                                 |
| <i>ypeI</i> |  |  |  | <i>ypeI</i>                     | N-acylhomoserine lactone synth AHL                                              |
| <i>ypkA</i> |  |  |  | <i>ypkA</i>                     |                                                                                 |
| YPMT1.29c   |  |  |  | Hypothetical Protein            |                                                                                 |
| YPMT1.32    |  |  |  | Putative Lipoprotein            |                                                                                 |
| YPMT1.42    |  |  |  | Putative Periplasmic Protein    |                                                                                 |
| YPMT1.45c   |  |  |  | Hypothetical Protein            |                                                                                 |
| YPMT1.68c   |  |  |  | <i>parA</i>                     | Partitioning Protein A                                                          |
| YPMT1.69    |  |  |  | Hypothetical Protein            |                                                                                 |
| YPMT1.72c   |  |  |  | Hypothetical Protein            |                                                                                 |
| YPMT1.74    |  |  |  | Murine toxin Protein            |                                                                                 |
| YPMT1.81c   |  |  |  | Putative F1 Operon Positive Re; |                                                                                 |
| YPO0003     |  |  |  | <i>asnA</i>                     | Aspartate-ammonia ligase Aspartate family biosynthesis                          |
| YPO0007     |  |  |  |                                 | Ribose permease Transport/binding Carbohydrates,organic acids and alcohols      |
| YPO0024     |  |  |  | <i>glnA</i>                     | Glutamine synthetase Glutamate family biosynthesis                              |
| YPO0026     |  |  |  | <i>bipA, typA</i>               | Putative GTPase Pathogenicity                                                   |
| YPO0027     |  |  |  |                                 | Conserved hypothetical protein Unknown                                          |
| YPO0028     |  |  |  | <i>rbn</i>                      | Ribonuclease BN Aminoacyl tRNA synthetases and their modification               |
| YPO0029     |  |  |  |                                 | Conserved hypothetical protein Unknown                                          |
| YPO0037     |  |  |  | <i>trmH, spoU</i>               | tRNA (guanosine-2'-O-)-methyl Aminoacyl tRNA synthetases and their modification |
| YPO0042     |  |  |  |                                 | Putative membrane protein Membranes, lipoproteins and porins                    |
| YPO0044     |  |  |  | <i>rph</i>                      | Ribonuclease PH Degradation of RNA                                              |
| YPO0045     |  |  |  | <i>pyrE</i>                     | Orotate phosphoribosyltransferase Pyrimidine ribonucleotide biosynthesis        |
| YPO0050     |  |  |  | <i>rpmB</i>                     | 50S ribosomal protein L28 Ribosomal protein synthesis and modification          |

|         |  |                   |                                   |                                                                     |
|---------|--|-------------------|-----------------------------------|---------------------------------------------------------------------|
| YPO0051 |  | <i>rpmG</i>       | 50S ribosomal protein L33         | Ribosomal protein synthesis and modification                        |
| YPO0052 |  | <i>mutM, fpg</i>  | Formamidopyrimidine-DNA gly       | DNA replication, restriction/modification, recombination and repair |
| YPO0059 |  | <i>kbl</i>        | Amino-3-ketobutyrate coenzym      | Fatty acid biosynthesis                                             |
| YPO0060 |  | <i>tdh</i>        | Threonine 3-dehydrogenase         | Degradation of amino acids                                          |
| YPO0089 |  | <i>glpX</i>       | GlpX protein (pseudogene)         | Central intermediary metabolism                                     |
| YPO0091 |  | <i>glpF</i>       | Glycerol uptake facilitator prote | Membranes, lipoproteins and porins                                  |
| YPO0100 |  |                   | Hypothetical protein              | Unknown                                                             |
| YPO0102 |  |                   | Putative exported protein         | Membranes, lipoproteins and porins                                  |
| YPO0111 |  | <i>rpmE</i>       | 50S ribosomal protein L31         | Ribosomal protein synthesis and modification                        |
| YPO0112 |  |                   | Conserved hypothetical protein    | Unknown                                                             |
| YPO0114 |  | <i>metJ</i>       | Ranscriptional repressor protein  | Broad regulatory functions                                          |
| YPO0120 |  | <i>glpR</i>       | Glycerol-3-phosphate repressor    | Broad regulatory functions                                          |
| YPO0130 |  |                   | Putative exported protein         | Membranes, lipoproteins and porins                                  |
| YPO0138 |  | <i>pckA, pck</i>  | Phosphoenolpyruvate carboxyki     | Gluconeogenesis                                                     |
| YPO0149 |  |                   | Putative membrane protein         | Membranes, lipoproteins and porins                                  |
| YPO0152 |  | <i>aroB</i>       | 3-dehydroquinat synthase          | Aromatic amino acid family biosynthesis                             |
| YPO0155 |  | <i>rpe</i>        | Ribulose-phosphate 3-epimerase    | Degradation of Polysaccharides                                      |
| YPO0157 |  | <i>trpS</i>       | Tryptophanyl-tRNA synthetase      | Aminoacyl tRNA synthetases and their modification                   |
| YPO0158 |  | <i>cysG</i>       | Siroheme synthase                 | Heme and porphyrin Biosynthesis                                     |
| YPO0159 |  | <i>nirC</i>       | Putative nitrite transporter      | Transport/binding Anions                                            |
| YPO0160 |  | <i>nirD</i>       | Nitrite reductase [NAD            | Anaerobic respiration                                               |
| YPO0164 |  |                   | Putative membrane receptor pro    | Cell envelop                                                        |
| YPO0165 |  |                   | LacI-family transcriptional regu  | Broad regulatory functions                                          |
| YPO0177 |  |                   | Putative membrane protein         | Membranes, lipoproteins and porins                                  |
| YPO0180 |  |                   | Conserved hypothetical protein    | Unknown                                                             |
| YPO0184 |  | <i>tauC, ssiC</i> | Putative taurine transport system | Transport/binding Carbohydrates,organic acids and alcohols          |
| YPO0199 |  |                   | Conserved hypothetical protein    | Unknown                                                             |
| YPO0205 |  | <i>bfd</i>        | Putative bacterioferritin-associa | Iron uptake                                                         |
| YPO0209 |  | <i>rpsJ, nusE</i> | 30S ribosomal protein S10         | Ribosomal protein synthesis and modification                        |
| YPO0210 |  | <i>rplC</i>       | 50S ribosomal protein L3          | Ribosomal protein synthesis and modification                        |
| YPO0211 |  | <i>rplD, eryA</i> | 50S ribosomal protein L4          | Ribosomal protein synthesis and modification                        |
| YPO0212 |  | <i>rplW</i>       | 50S ribosomal protein L23         | Ribosomal protein synthesis and modification                        |
| YPO0213 |  | <i>rplB</i>       | 50S ribosomal protein l2          | Ribosomal protein synthesis and modification                        |
| YPO0214 |  | <i>rpsS</i>       | 30S ribosomal protein S19         | Ribosomal protein synthesis and modification                        |
| YPO0215 |  | <i>rplV, eryB</i> | 50S ribosomal protein L22         | Ribosomal protein synthesis and modification                        |
| YPO0216 |  | <i>rpsC</i>       | 30S ribosomal protein S3          | Ribosomal protein synthesis and modification                        |
| YPO0217 |  | <i>rplP</i>       | 50S ribosomal protein L16         | Ribosomal protein synthesis and modification                        |
| YPO0218 |  | <i>rpmC</i>       | 50S ribosomal protein L29         | Ribosomal protein synthesis and modification                        |
| YPO0219 |  | <i>rpsQ, neaA</i> | 30S ribosomal protein S17         | Ribosomal protein synthesis and modification                        |
| YPO0220 |  | <i>rplN</i>       | 50S ribosomal protein L14         | Ribosomal protein synthesis and modification                        |
| YPO0222 |  | <i>rplE</i>       | 50S ribosomal protein L5          | Ribosomal protein synthesis and modification                        |

|         |  |             |                           |                                              |                                                       |                                    |                                                                     |
|---------|--|-------------|---------------------------|----------------------------------------------|-------------------------------------------------------|------------------------------------|---------------------------------------------------------------------|
| YPO0223 |  | <i>rpsH</i> | 30S ribosomal protein S8  | Ribosomal protein synthesis and modification |                                                       |                                    |                                                                     |
| YPO0224 |  | <i>rplF</i> | 50S ribosomal protein L6  | Ribosomal protein synthesis and modification |                                                       |                                    |                                                                     |
| YPO0225 |  | <i>rplR</i> | 50S ribosomal protein L18 | Ribosomal protein synthesis and modification |                                                       |                                    |                                                                     |
| YPO0226 |  | <i>rpsE</i> | 30S ribosomal protein S5  | Ribosomal protein synthesis and modification |                                                       |                                    |                                                                     |
| YPO0227 |  | <i>rpmD</i> | 50S ribosomal protein L30 | Ribosomal protein synthesis and modification |                                                       |                                    |                                                                     |
| YPO0228 |  |             | <i>rplO</i>               | 50S ribosomal protein L15                    | Ribosomal protein synthesis and modification          |                                    |                                                                     |
| YPO0229 |  |             | <i>secY, prlA</i>         | Preprotein translocase SecY sub              | Transport/binding proteins                            |                                    |                                                                     |
| YPO0234 |  |             | <i>rpoA</i>               | DNA-directed RNA polymerase                  | RNA synthesis, RNA modification and DNA transcription |                                    |                                                                     |
| YPO0236 |  |             | <i>zntR</i>               | MerR-family transcriptional reg              | Broad regulatory functions                            |                                    |                                                                     |
| YPO0239 |  |             | <i>trkA</i>               | Trk system potassium uptake pr               | Transport/binding proteins                            |                                    |                                                                     |
| YPO0240 |  |             |                           | Conserved hypothetical protein               | Unknown                                               |                                    |                                                                     |
| YPO0251 |  |             |                           | Putative transmembrane transpo               | Membranes, lipoproteins and porins                    |                                    |                                                                     |
| YPO0252 |  |             |                           | Putative membrane protein                    | Membranes, lipoproteins and porins                    |                                    |                                                                     |
| YPO0253 |  |             | <i>acs</i>                | Acetyl-coenzyme A synthetase                 | Degradation of carbon compounds                       |                                    |                                                                     |
| YPO0254 |  |             | <i>glpP</i>               | Proton glutamate symport protei              | Membranes, lipoproteins and porins                    |                                    |                                                                     |
| YPO0274 |  |             |                           | Putative integral membrane prot              | Membranes, lipoproteins and porins                    |                                    |                                                                     |
| YPO0275 |  |             |                           | Conserved hypothetical protein               | Unknown                                               |                                    |                                                                     |
| YPO0276 |  |             |                           | Putative LysR-family transcripti             | Broad regulatory functions                            |                                    |                                                                     |
| YPO0280 |  |             |                           | <i>hmuU</i>                                  | Hemin transport system permea                         | Transport/binding proteins         |                                                                     |
| YPO0281 |  |             |                           | <i>hmuT</i>                                  | Hemin-binding periplasmic prot                        | Transport/binding proteins         |                                                                     |
| YPO0282 |  |             |                           | <i>hmuS</i>                                  | Hemin transport protein                               | Transport/binding proteins         |                                                                     |
| YPO0284 |  |             |                           |                                              | Conserved hypothetical protein                        | Unknown                            |                                                                     |
| YPO0285 |  |             |                           |                                              | Conserved hypothetical protein                        | Unknown                            |                                                                     |
| YPO0286 |  |             |                           |                                              | Putative coproporphyrinogen III                       | Heme and porphyrin Biosynthesis    |                                                                     |
| YPO0287 |  |             |                           |                                              | Putative methylenetetrahydrofol                       | Aspartate family biosynthesis      |                                                                     |
| YPO0289 |  |             |                           |                                              | Putative ATP,GTP-binding prote                        | Unknown                            |                                                                     |
| YPO0290 |  |             |                           |                                              | Conserved hypothetical protein                        | Unknown                            |                                                                     |
| YPO0291 |  |             |                           |                                              | Conserved hypothetical protein                        | Unknown                            |                                                                     |
| YPO0292 |  |             |                           |                                              | Conserved hypothetical protein                        | Unknown                            |                                                                     |
| YPO0293 |  |             |                           |                                              | Conserved hypothetical protein                        | Unknown                            |                                                                     |
| YPO0294 |  |             |                           |                                              | <i>terZ</i>                                           | Tellurium resistance protein       | Drug/analogue sensitivity                                           |
| YPO0295 |  |             |                           |                                              | <i>terA</i>                                           | Putative tellurite resistance prot | Drug/analogue sensitivity                                           |
| YPO0296 |  |             |                           |                                              | <i>terB</i>                                           | Tellurite resistance protein       | Drug/analogue sensitivity                                           |
| YPO0300 |  |             |                           |                                              |                                                       | Transposase for the IS1541 inse    |                                                                     |
| YPO0306 |  |             |                           |                                              |                                                       | Hypothetical protein               | Unknown                                                             |
| YPO0309 |  |             |                           |                                              |                                                       | Putative exported protein          | Membranes, lipoproteins and porins                                  |
| YPO0312 |  |             |                           |                                              | <i>plsB, b441</i>                                     | Glycerol-3-phosphate acyltransf    | Synthesis and modification of Phospholipids                         |
| YPO0316 |  |             |                           |                                              |                                                       | Conserved hypothetical protein     | Unknown                                                             |
| YPO0318 |  |             |                           |                                              | <i>pspG</i>                                           | Putative exported protein          | Membranes, lipoproteins and porins                                  |
| YPO0319 |  |             |                           |                                              | <i>qor, hcz, b4</i>                                   | Quinone oxidoreductase             | Degradation of small molecule                                       |
| YPO0324 |  |             |                           |                                              | <i>uvrA, dinE</i>                                     | Excinuclease ABC subunit A         | DNA replication, restriction/modification, recombination and repair |

|         |  |  |  |                                                    |                                                                     |
|---------|--|--|--|----------------------------------------------------|---------------------------------------------------------------------|
| YPO0325 |  |  |  | <i>ssb, exrB, lc</i> Single-strand binding protein | DNA replication, restriction/modification, recombination and repair |
| YPO0326 |  |  |  | Conserved hypothetical protein                     | Unknown                                                             |
| YPO0332 |  |  |  | <i>rhaS, rhaC2</i> L-rhamnose operon regulatory p  | Broad regulatory functions                                          |
| YPO0336 |  |  |  | Insertion element protein (fragm                   |                                                                     |
| YPO0337 |  |  |  | Putative exported protein                          | Membranes, lipoproteins and porins                                  |
| YPO0338 |  |  |  | Hypothetical protein                               | Unknown                                                             |
| YPO0354 |  |  |  | <i>efp, b4147</i> Elongation factor P              | Protein translation and modification                                |
| YPO0363 |  |  |  | Putative membrane transport pr                     | Membranes, lipoproteins and porins                                  |
| YPO0365 |  |  |  | Conserved hypothetical protein                     | Unknown                                                             |
| YPO0366 |  |  |  | <i>orn, b4162</i> Oligoribonuclease                | Degradation of RNA                                                  |
| YPO0370 |  |  |  | Putative N-acetylmuramoyl-L-a                      | Unknown                                                             |
| YPO0372 |  |  |  | <i>miaA, trpX,</i> tRNA delta(2)-isopentenylpyro   | Aminoacyl tRNA synthetases and their modification                   |
| YPO0397 |  |  |  | Hypothetical protein                               | Unknown                                                             |
| YPO0398 |  |  |  | Peptidase family protein                           | Membranes, lipoproteins and porins                                  |
| YPO0401 |  |  |  | Putative transcriptional regulato                  | Broad regulatory functions                                          |
| YPO0404 |  |  |  | PTS system, IIC component                          | Transport/binding Carbohydrates,organic acids and alcohols          |
| YPO0407 |  |  |  | <i>lsrG</i> Cleavage of P-DPD cleavage pr          | Lsr operon                                                          |
| YPO0408 |  |  |  | <i>lsrF</i> Putative aldolase                      | Lsr operon                                                          |
| YPO0409 |  |  |  | <i>lsrB</i> AI-2 receptor, periplasmic prote       | Lsr operon                                                          |
| YPO0410 |  |  |  | <i>lsrD</i> Putative ABC transporter perme         | Lsr operon                                                          |
| YPO0411 |  |  |  | <i>lsrC</i> Putative ABC transporter perme         | Lsr operon                                                          |
| YPO0412 |  |  |  | <i>lsrA</i> Putative ABC transporter ATP-b         | Lsr operon                                                          |
| YPO0414 |  |  |  | <i>lsrR</i> Pesudogene, repressor binds spe        | Lsr operon                                                          |
| YPO0415 |  |  |  | <i>lsrK</i> Kinase phosphorylates carbon-5         | Lsr operon                                                          |
| YPO0416 |  |  |  | <i>rfaQ, waaQ</i> Putative lipopolysaccharide cor  | Surface polysaccharides, lipopolysaccharides and antigens           |
| YPO0417 |  |  |  | <i>waaL</i> Putative O-antigen biosynthesis        | Membranes, lipoproteins and porins                                  |
| YPO0426 |  |  |  | Putative membrane protein                          | Membranes, lipoproteins and porins                                  |
| YPO0431 |  |  |  | <i>osmY, b437,</i> Osmotically inducible protein Y | Unknown                                                             |
| YPO0435 |  |  |  | Putative Na <sup>+</sup> dependent nucleos         | Transport/binding proteins                                          |
| YPO0436 |  |  |  | <i>deoC, dra, t</i> Deoxyribose-phosphate aldolase | Serine family biosynthesis                                          |
| YPO0437 |  |  |  | <i>deoA, tpp, t</i> Thymidine phosphorylase (pseu  | Salvage of nucleosides and nucleotides                              |
| YPO0439 |  |  |  | <i>deoB, drm,</i> Phosphopentomutase               | Salvage of nucleosides and nucleotides                              |
| YPO0440 |  |  |  | <i>deoD, pup,</i> Purine nucleoside phosphorylas   | Salvage of nucleosides and nucleotides                              |
| YPO0442 |  |  |  | <i>serB, b4385</i> Phosphoserine phosphatase       | Serine family biosynthesis                                          |
| YPO0445 |  |  |  | Conserved hypothetical protein                     | Unknown                                                             |
| YPO0455 |  |  |  | Putative phosphoglycerate muta                     |                                                                     |
| YPO0463 |  |  |  | <i>talB</i> Transaldolase B                        | Pentose phosphate pathway                                           |
| YPO0467 |  |  |  | <i>yaaH</i> Putative membrane protein              | Membranes, lipoproteins and porins                                  |
| YPO0468 |  |  |  | <i>dnaK, grpF,</i> Chaperone protein DnaK          | Chaperones, chaperonins, heat shock                                 |
| YPO0472 |  |  |  | <i>rpsT, b23</i> 30S ribosomal protein S20         | Ribosomal protein synthesis and modification                        |
| YPO0473 |  |  |  | Hypothetical protein                               | Unknown                                                             |

|          |  |  |                       |                                  |                                                     |
|----------|--|--|-----------------------|----------------------------------|-----------------------------------------------------|
| YPO0481  |  |  | <i>carA, pyrA</i>     | Carbamoyl-phosphate synthase     | Glutamate family biosynthesis                       |
| YPO0483  |  |  |                       | Putative LysE type translocator  | Transport/binding Amino acids and amines            |
| YPO0490  |  |  | <i>apaH, b49</i>      | Bis(5'nucleosyl)-tetraphosphata  | Miscellaneous nucleoside/nucleotide reactions       |
| YPO0495  |  |  | <i>imp, ostA, b</i>   | Organic solvent tolerance protei | Adaptions and atypical conditions                   |
| YPO0498  |  |  |                       | Hypothetical protein             | Unknown                                             |
| YPO0499  |  |  |                       | Hypothetical protein             | Unknown                                             |
| YPO0500  |  |  |                       | Conserved hypothetical protein   | Unknown                                             |
| YPO0501  |  |  |                       | Conserved hypothetical protein   | Unknown                                             |
| YPO0502  |  |  |                       | Conserved hypothetical protein   | Unknown                                             |
| YPO0503  |  |  |                       | Conserved hypothetical protein   | Unknown                                             |
| YPO0504  |  |  |                       | Conserved hypothetical protein   | Unknown                                             |
| YPO0505  |  |  |                       | Conserved hypothetical protein   | Unknown                                             |
| YPO0506  |  |  | <i>clpB, htpM</i>     | Putative Clp ATPase              | Degradation of Proteins, peptides and glycopeptides |
| YPO0507  |  |  |                       | Conserved hypothetical protein   | Unknown                                             |
| YPO0508  |  |  |                       | Hypothetical protein             | Unknown                                             |
| YPO0509  |  |  |                       | Hypothetical protein             | Unknown                                             |
| YPO0510  |  |  |                       | Hypothetical protein             | Unknown                                             |
| YPO0511  |  |  |                       | Hypothetical protein             | Unknown                                             |
| YPO0511a |  |  |                       | Hypothetical protein             | Unknown                                             |
| YPO0512  |  |  |                       | Putative lipoprotein             | Membranes, lipoproteins and porins                  |
| YPO0513  |  |  |                       | Conserved hypothetical protein   | Unknown                                             |
| YPO0514  |  |  |                       | Putative OmpA-family membra      | Membranes, lipoproteins and porins                  |
| YPO0516  |  |  |                       | Hypothetical protein             | Unknown                                             |
| YPO0525  |  |  |                       | Hypothetical protein             | Unknown                                             |
| YPO0552  |  |  | <i>mraY, murX</i>     | Phospho-N-acetylmuramoyl-pe      | Murein sacculus and peptidoglycan                   |
| YPO0553  |  |  | <i>murD</i>           | UDP-N-acetylmuramoylalanine      | Murein sacculus and peptidoglycan                   |
| YPO0557  |  |  | <i>ddlB, ddl</i>      | D-alanine--D-alanine ligase B    | Murein sacculus and peptidoglycan                   |
| YPO0560  |  |  | <i>ftsZ, sfiB, st</i> | Cell division protein FtsZ       | Cell division                                       |
| YPO0562  |  |  |                       | Conserved hypothetical protein   | Unknown                                             |
| YPO0563  |  |  |                       | Putative exported protein        | Membranes, lipoproteins and porins                  |
| YPO0568  |  |  |                       | Putative membrane protein        | Membranes, lipoproteins and porins                  |
| YPO0569a |  |  |                       | Conserved hypothetical protein   | Unknown                                             |
| YPO0570  |  |  | <i>yqjD</i>           | Putative membrane protein        | Membranes, lipoproteins and porins                  |
| YPO0571  |  |  |                       | Hypothetical protein             | Unknown                                             |
| YPO0584  |  |  |                       | Putative symporter protein       | Transport/binding proteins                          |
| YPO0589  |  |  | <i>fadH, fadH1</i>    | 2,4-dienoyl-CoA reductase        | Degradation of small molecule                       |
| YPO0590  |  |  | <i>hdeD</i>           | Putative membrane protein        | Membranes, lipoproteins and porins                  |
| YPO0609  |  |  |                       | Putative transporter ATP-bindin  | Transport/binding proteins                          |
| YPO0623  |  |  |                       | Putative aminotransferase        | Unknown                                             |
| YPO0624  |  |  |                       | Putative membrane protein        | Membranes, lipoproteins and porins                  |
| YPO0625  |  |  |                       | Hypothetical protein             | Unknown                                             |

|         |  |  |  |                                    |                                                                                                  |
|---------|--|--|--|------------------------------------|--------------------------------------------------------------------------------------------------|
| YPO0626 |  |  |  | Conserved hypothetical protein     | Unknown                                                                                          |
| YPO0627 |  |  |  | Putative translational inhibitor p | Unknown                                                                                          |
| YPO0628 |  |  |  | Putative translational inhibitor p | Unknown                                                                                          |
| YPO0630 |  |  |  | Conserved hypothetical protein     | Unknown                                                                                          |
| YPO0643 |  |  |  | <i>rpoD, alt</i>                   | RNA polymerase sigma factor F RNA synthesis, RNA modification and DNA transcription              |
| YPO0644 |  |  |  | <i>dnaG, dnaF</i>                  | DNA primase DNA replication, restriction/modification, recombination and repair                  |
| YPO0645 |  |  |  | <i>rpsU</i>                        | 30S ribosomal protein S21 Ribosomal protein synthesis and modification                           |
| YPO0651 |  |  |  |                                    | Putative exported protein Membranes, lipoproteins and porins                                     |
| YPO0660 |  |  |  |                                    | Conserved hypothetical protein Unknown                                                           |
| YPO0668 |  |  |  | <i>parE, nfxD</i>                  | Topoisomerase IV subunit B DNA replication, restriction/modification, recombination and repair   |
| YPO0669 |  |  |  | <i>crgA</i>                        | LysR-family regulatory protein Broad regulatory functions                                        |
| YPO0671 |  |  |  | <i>parC</i>                        | DNA topoisomerase IV subunit DNA replication, restriction/modification, recombination and repair |
| YPO0672 |  |  |  | <i>plsC, parF</i>                  | Putative acyltransferase Unknown                                                                 |
| YPO0676 |  |  |  |                                    | Putative aldo,keto reductase fan Unknown                                                         |
| YPO0678 |  |  |  |                                    | Putative iron-containing alcohol Unknown                                                         |
| YPO0682 |  |  |  | <i>exbB</i>                        | MotA,TolQ,ExbB proton chann Transport/binding proteins                                           |
| YPO0683 |  |  |  | <i>exbD</i>                        | ExbD,TolR-family transport pro Transport/binding proteins                                        |
| YPO0699 |  |  |  |                                    | Fimbrial chaperone protein Chaperones, chaperonins, heat shock                                   |
| YPO0700 |  |  |  |                                    | Fimbrial protein Surface structures                                                              |
| YPO0727 |  |  |  | <i>flgF</i>                        | Putative flagellar basal-body roc Chemotaxis and mobility                                        |
| YPO0735 |  |  |  |                                    | Hypothetical protein Unknown                                                                     |
| YPO0736 |  |  |  |                                    | Putative regulatory protein Broad regulatory functions                                           |
| YPO0752 |  |  |  | <i>pcpY, pcp, s</i>                | Putative lipoprotein (pseudogen Membranes, lipoproteins and porins                               |
| YPO0784 |  |  |  | <i>lgt, umpA</i>                   | Prolipoprotein diacylglyceryl tra Synthesis and modification of Phospholipids                    |
| YPO0790 |  |  |  | <i>tas</i>                         | Putative aldo,keto reductase-fan Unknown                                                         |
| YPO0800 |  |  |  |                                    | Putative exported protein Membranes, lipoproteins and porins                                     |
| YPO0801 |  |  |  |                                    | Conserved hypothetical protein Unknown                                                           |
| YPO0814 |  |  |  | <i>gspF</i>                        | General secretion pathway prote Transport/binding proteins                                       |
| YPO0819 |  |  |  |                                    | Putative carbonic anhydrase Unknown                                                              |
| YPO0821 |  |  |  |                                    | Hypothetical protein Unknown                                                                     |
| YPO0822 |  |  |  |                                    | Putative exported protein Membranes, lipoproteins and porins                                     |
| YPO0823 |  |  |  | <i>YapM</i>                        | Autotransporter Membranes, lipoproteins and porins                                               |
| YPO0831 |  |  |  |                                    | DeoR-family regulatory protein Broad regulatory functions                                        |
| YPO0832 |  |  |  | <i>agaZ</i>                        | Putative tagatose 6-phosphate ki Degradation of carbon compounds                                 |
| YPO0833 |  |  |  |                                    | Putative phosphosugar isomeras Degradation of carbon compounds                                   |
| YPO0834 |  |  |  | <i>manX</i>                        | Putative PTS transport protein Transport/binding Carbohydrates,organic acids and alcohols        |
| YPO0835 |  |  |  |                                    | Putative PTS permease protein Transport/binding Carbohydrates,organic acids and alcohols         |
| YPO0836 |  |  |  |                                    | Putative PTS permease protein Transport/binding Carbohydrates,organic acids and alcohols         |
| YPO0838 |  |  |  |                                    | Putative acetylglucosamine-6-pl Degradation of carbon compounds                                  |
| YPO0839 |  |  |  | <i>kduD2</i>                       | 2-deoxy-D-gluconate 3-dehydro Degradation of carbon compounds                                    |
| YPO0841 |  |  |  |                                    | Putative regulatory protein Broad regulatory functions                                           |



|          |  |  |  |                                 |                                    |
|----------|--|--|--|---------------------------------|------------------------------------|
| YPO0842  |  |  |  | Putative sulfatase              | Sulphur metabolism                 |
| YPO0844  |  |  |  | Putative aldolase               | Degradation of carbon compounds    |
| YPO0845  |  |  |  | ThiJ,PfpI-family thiamine bioge | Thiamine Biosynthesis              |
| YPO0862  |  |  |  | Putative exported protein       | Membranes, lipoproteins and porins |
| YPO0881  |  |  |  | Conserved hypothetical protein  | Unknown                            |
| YPO0882  |  |  |  | Conserved hypothetical protein  | Unknown                            |
| YPO0889  |  |  |  | <i>prfB, supK</i>               | Peptide chain release factor 2     |
| YPO0900  |  |  |  | Putative hemolysin III          | Pathogenicity                      |
| YPO0904  |  |  |  | Hypothetical protein            | Unknown                            |
| YPO0905  |  |  |  | <i>gcvP</i>                     | Glycine dehydrogenase              |
| YPO0906  |  |  |  | <i>gcsH</i>                     | Glycine cleavage system H prot     |
| YPO0907  |  |  |  | <i>gcvT</i>                     | Aminomethyltransferase             |
| YPO0913  |  |  |  |                                 | Putative 5-formyltetrahydrofola    |
| YPO0917  |  |  |  | <i>yggE</i>                     | Putative exported protein          |
| YPO0928  |  |  |  |                                 | Putative Rieske protein            |
| YPO0929  |  |  |  | <i>speA</i>                     | Biosynthetic arginine decarboxy    |
| YPO0931  |  |  |  | <i>metK</i>                     | S-adenosylmethionine synthetas     |
| YPO0934  |  |  |  |                                 | Conserved hypothetical protein     |
| YPO0936  |  |  |  |                                 | Conserved hypothetical protein     |
| YPO0937  |  |  |  |                                 | Conserved hypothetical protein     |
| YPO0941  |  |  |  |                                 | Conserved hypothetical protein     |
| YPO0943  |  |  |  | <i>yggT</i>                     | Putative membrane protein          |
| YPO0944  |  |  |  |                                 | Conserved hypothetical protein     |
| YPO0945  |  |  |  |                                 | Conserved hypothetical protein     |
| YPO0946  |  |  |  |                                 | Putative oxygen-independent co     |
| YPO0948  |  |  |  |                                 | Conserved hypothetical protein     |
| YPO0950  |  |  |  |                                 | Conserved hypothetical protein     |
| YPO0951  |  |  |  |                                 | Putative methyltransferase         |
| YPO0952  |  |  |  | <i>mutY, mutB</i>               | A,G-specific adenine glycosylas    |
| YPO0954  |  |  |  | <i>mltC</i>                     | Membrane-bound lytic murein t      |
| YPO0955  |  |  |  |                                 | Hypothetical protein               |
| YPO0956  |  |  |  |                                 | Putative hydroxamate-type ferri    |
| YPO0983  |  |  |  |                                 | Putative membrane protein          |
| YPO0984  |  |  |  | <i>yspI</i>                     | N-acylhomoserine lactone synth     |
| YPO0985  |  |  |  | <i>yspR</i>                     | Quorum-sensing transcriptional     |
| YPO0986  |  |  |  |                                 | Putative exported protein          |
| YPO0987  |  |  |  |                                 | Putative exported protein          |
| YPO0992  |  |  |  | <i>iucC</i>                     | Putative siderophore biosynthes    |
| YPO0993  |  |  |  | <i>iucD</i>                     | Putative siderophore biosynthes    |
| YPO1011  |  |  |  | <i>ynpI</i>                     | Putative TonB-dependent outer      |
| YPO1014a |  |  |  |                                 | Prepilin peptidase (partial)       |

|          |   |   |  |   |                                |                                      |
|----------|---|---|--|---|--------------------------------|--------------------------------------|
| YPO1023  |   |   |  |   | N-acetylmuramoyl-L-alanine an  | Murein sacculus and peptidoglycan    |
| YPO1025  |   |   |  |   | Membrane-bound lytic murein t  | Murein sacculus and peptidoglycan    |
| YPO1030  |   |   |  |   | Conserved hypothetical protein | Unknown                              |
| YPO1031  |   |   |  |   | Conserved hypothetical protein | Unknown                              |
| YPO1037  |   |   |  |   | Conserved hypothetical protein | Unknown                              |
| YPO1038  | ■ |   |  |   | Conserved hypothetical protein | Unknown                              |
| YPO1040  |   |   |  |   | Conserved hypothetical protein | Unknown                              |
| YPO1041  |   |   |  | ■ | <i>dapD</i>                    | 2,3,4,5-tetrahydropyridine-2-car     |
| YPO1044  |   |   |  | ■ | <i>rpsB</i>                    | 30S ribosomal protein S2             |
| YPO1045  |   |   |  | ■ | <i>tsf</i>                     | Elongation factor Ts                 |
| YPO1049  |   |   |  | ■ | <i>uppS, rth</i>               | Undecaprenyl pyrophosphate sy        |
| YPO1051  | ■ |   |  |   | Putative membrane protein      | Membranes, lipoproteins and porins   |
| YPO1054  | ■ |   |  |   | <i>lpxD, firA, t</i>           | UDP-3-o-[3-hydroxymyristoyl]         |
| YPO1055  | ■ |   |  |   | <i>fabZ, sefA</i>              | (3R)-hydroxymyristoyl-(acyl ca       |
| YPO1056  | ■ |   |  |   | <i>lpxA</i>                    | Acyl-[acyl-carrier-protein]-UD       |
| YPO1057  | ■ |   |  |   | <i>lpxB, pgsB</i>              | Lipid-A-disaccharide synthase        |
| YPO1058  | ■ |   |  |   | <i>rnhB, b183</i>              | Ribonuclease HIII                    |
| YPO1068  |   |   |  | ■ | <i>proS, drpA</i>              | Prolyl-tRNA synthetase               |
| YPO1071  | ■ |   |  |   | Putative lipoprotein           | Membranes, lipoproteins and porins   |
| YPO1072  | ■ | ■ |  |   | ABC transporter permease prote | Transport/binding proteins           |
| YPO1078  |   |   |  | ■ | <i>mltD, dniR</i>              | Membrane-bound lytic murein t        |
| YPO1086a |   |   |  | ■ | Phage integrase (partial)      |                                      |
| YPO1092  |   | ■ |  |   | Putative DNA-binding prophage  | Phage-related functions and prophage |
| YPO1098  |   | ■ |  | ■ | Putative prophage integrase    |                                      |
| YPO1104  | ■ |   |  |   | Conserved hypothetical protein | Unknown                              |
| YPO1107  |   |   |  | ■ | <i>grpE</i>                    | Heat shock protein GrpE              |
| YPO1108  |   | ■ |  |   | <i>gltA, glut, i</i>           | Citrate synthase GltA                |
| YPO1111  |   |   |  | ■ | <i>sdhA</i>                    | Succinate dehydrogenase flavop       |
| YPO1112  |   |   |  | ■ | <i>sdhB</i>                    | Succinate dehydrogenase iron-s       |
| YPO1113  |   |   |  | ■ | <i>sucA</i>                    | 2-oxoglutarate dehydrogenase E       |
| YPO1114  |   |   |  | ■ | <i>sucB</i>                    | Dihydrolipoamide succinyltrans       |
| YPO1115  |   |   |  | ■ | <i>sucC, b728</i>              | Succinyl-CoA synthetase beta cl      |
| YPO1116  |   |   |  | ■ | <i>sucD</i>                    | Succinyl-CoA synthetase alpha        |
| YPO1117  |   |   |  | ■ | <i>cydA</i>                    | Cytochrome D ubiquinol oxidas        |
| YPO1118  |   |   |  | ■ | <i>cydB</i>                    | Cytochrome D ubiquinol oxidas        |
| YPO1120  | ■ |   |  |   | Conserved hypothetical protein | Unknown                              |
| YPO1121  |   | ■ |  |   | <i>tolQ</i>                    | TolQ colicin import protein          |
| YPO1127  |   |   |  | ■ | <i>nadA, nicA</i>              | Quinolinate synthetase A             |
| YPO1133  |   |   |  | ■ | <i>gpmA, gpm</i>               | Phosphoglycerate mutase 1            |
| YPO1137  |   |   |  | ■ | <i>galK, galA</i>              | Galactokinase                        |
| YPO1138  |   |   |  | ■ | <i>galT, galB</i>              | Galactose-1-phosphate uridylylt      |

|         |                                                                                     |                                                                                   |                                                                                     |                   |                                            |                                      |
|---------|-------------------------------------------------------------------------------------|-----------------------------------------------------------------------------------|-------------------------------------------------------------------------------------|-------------------|--------------------------------------------|--------------------------------------|
| YPO1139 |                                                                                     |                                                                                   |    | <i>galE, galD</i> | UDP-glucose 4-epimerase                    | Galactose operon                     |
| YPO1145 |                                                                                     |                                                                                   |                                                                                     | <i>modA</i>       | Molybdate-binding periplasmic              | Transport/binding Anions             |
| YPO1149 |                                                                                     |                                                                                   |    |                   | Conserved hypothetical protein             | Unknown                              |
| YPO1151 |                                                                                     |                                                                                   |                                                                                     | <i>bioB</i>       | Biotin synthase                            | Biotin Biosynthesis                  |
| YPO1152 |    |                                                                                   |                                                                                     | <i>bioF</i>       | 8-amino-7-oxononanoate synthase            | Biotin Biosynthesis                  |
| YPO1158 |                                                                                     |                                                                                   |    |                   | Conserved hypothetical protein             | Unknown                              |
| YPO1160 |    |                                                                                   |                                                                                     | <i>moaC, chlA</i> | Molybdenum cofactor biosynthesis           | Molybdopterin Biosynthesis           |
| YPO1161 |    |                                                                                   |                                                                                     | <i>moaD, chlA</i> | Molybdopterin [mpt] converting             | Molybdopterin Biosynthesis           |
| YPO1162 |    |                                                                                   |                                                                                     | <i>moaE, chlA</i> | Molybdopterin [mpt] converting             | Molybdopterin Biosynthesis           |
| YPO1168 |    |                                                                                   |                                                                                     | <i>betT</i>       | High-affinity choline transporter          | Adaptions and atypical conditions    |
| YPO1174 |                                                                                     |                                                                                   |                                                                                     |                   | Hypothetical protein                       | Unknown                              |
| YPO1176 |    |  |                                                                                     | <i>pbpG</i>       | Penicillin-binding protein 7 precursor     | Murein sacculus and peptidoglycan    |
| YPO1177 |    |                                                                                   |                                                                                     | <i>dld</i>        | D-lactate dehydrogenase                    | Aerobic respiration                  |
| YPO1181 |    |                                                                                   |                                                                                     |                   | Putative membrane protein                  | Membranes, lipoproteins and porins   |
| YPO1186 |                                                                                     |                                                                                   |    |                   | Conserved hypothetical protein             | Unknown                              |
| YPO1192 |    |                                                                                   |                                                                                     |                   | Conserved hypothetical protein             | Unknown                              |
| YPO1193 |    |                                                                                   |                                                                                     |                   | Putative pyridoxal-dependent dehydrogenase | Degradation of amino acids           |
| YPO1200 |    |                                                                                   |                                                                                     |                   | Putative amino acid permease               |                                      |
| YPO1201 |    |                                                                                   |                                                                                     |                   | Putative amino acid decarboxylase          | Degradation of amino acids           |
| YPO1203 |                                                                                     |                                                                                   |    |                   | Putative membrane protein                  | Membranes, lipoproteins and porins   |
| YPO1207 |    |                                                                                   |    | <i>katA</i>       | Catalase                                   | Oxidative stress                     |
| YPO1208 |                                                                                     |                                                                                   |    |                   | Putative exported protein                  | Membranes, lipoproteins and porins   |
| YPO1212 |                                                                                     |                                                                                   |    |                   | Putative iron-sulphur binding protein      | Unknown                              |
| YPO1218 |                                                                                     |                                                                                   |    | <i>rcsB</i>       | Probable two component response regulator  | Broad regulatory functions           |
| YPO1221 |    |                                                                                   |                                                                                     |                   | Putative membrane protein                  | Membranes, lipoproteins and porins   |
| YPO1222 |    |  |                                                                                     | <i>ompC, meoA</i> | Outer membrane protein C, porin            | Cell envelope                        |
| YPO1224 |    |                                                                                   |                                                                                     | <i>ampH</i>       | Putative penicillin-binding protein        | Murein sacculus and peptidoglycan    |
| YPO1235 |                                                                                     |                                                                                   |   |                   | Conserved hypothetical protein             | Unknown                              |
| YPO1236 |                                                                                     |                                                                                   |                                                                                     |                   | Putative class II aldolase-family protein  | Unknown                              |
| YPO1239 |  |                                                                                   |                                                                                     |                   | Putative bacteriophage protein             | Phage-related functions and prophage |
| YPO1240 |  |                                                                                   |                                                                                     |                   | Putative ATP-binding protein               | Unknown                              |
| YPO1241 |  |                                                                                   |                                                                                     |                   | Putative bacteriophage protein             | Phage-related functions and prophage |
| YPO1242 |  |                                                                                   |  |                   | Putative bacteriophage tail sheath         | Phage-related functions and prophage |
| YPO1243 |  |                                                                                   |                                                                                     |                   | Hypothetical protein                       | Unknown                              |
| YPO1244 |  |                                                                                   |  |                   | Hypothetical protein                       | Unknown                              |
| YPO1245 |  |                                                                                   |                                                                                     |                   | Putative bacteriophage coat protein        | Phage-related functions and prophage |
| YPO1246 |  |                                                                                   |                                                                                     |                   | Putative bacteriophage protein             | Phage-related functions and prophage |
| YPO1248 |  |                                                                                   |                                                                                     |                   | Putative bacteriophage (baseplate)         | Phage-related functions and prophage |
| YPO1249 |  |                                                                                   |                                                                                     |                   | Putative bacteriophage protein C           | Phage-related functions and prophage |
| YPO1250 |  |                                                                                   |                                                                                     |                   | Putative bacteriophage protein             | Phage-related functions and prophage |
| YPO1251 |  |                                                                                   |                                                                                     |                   | Putative bacteriophage protein             | Phage-related functions and prophage |

|         |  |  |            |                                      |                                                |                                                             |
|---------|--|--|------------|--------------------------------------|------------------------------------------------|-------------------------------------------------------------|
| YPO1252 |  |  | <i>stf</i> | Putative bacteriophage tail fiber    | Phage-related functions and prophage           |                                                             |
| YPO1255 |  |  |            | Hypothetical protein                 | Unknown                                        |                                                             |
| YPO1260 |  |  |            | Putative membrane protein            | Membranes, lipoproteins and porins             |                                                             |
| YPO1261 |  |  |            | Conserved hypothetical protein       | Unknown                                        |                                                             |
| YPO1262 |  |  |            | Putative nucleoid-associated protein | Unknown                                        |                                                             |
| YPO1264 |  |  |            | <i>rplY</i>                          | 50S ribosomal protein L25                      | Ribosomal protein synthesis and modification                |
| YPO1276 |  |  |            | Putative membrane protein            | Membranes, lipoproteins and porins             |                                                             |
| YPO1278 |  |  |            | Putative membrane protein            | Membranes, lipoproteins and porins             |                                                             |
| YPO1284 |  |  |            | Putative elongation factor P         | Protein translation and modification           |                                                             |
| YPO1298 |  |  |            | <i>fruB, fruF, fruG</i>              | Bifunctional fructose-specific PTS             | Transport/binding Carbohydrates, organic acids and alcohols |
| YPO1299 |  |  |            | <i>fruK, fpk</i>                     | 1-phosphofructokinase                          | Glycolysis                                                  |
| YPO1300 |  |  |            | <i>fruA, ptsF</i>                    | PTS system, fructose-specific II               | Transport/binding Carbohydrates, organic acids and alcohols |
| YPO1301 |  |  |            | <i>psaE</i>                          | Putative regulatory protein                    | Broad regulatory functions                                  |
| YPO1302 |  |  |            | <i>psaF</i>                          | putative membrane protein                      | Membranes, lipoproteins and porins                          |
| YPO1303 |  |  |            | <i>psaA</i>                          | pH 6 antigen precursor (antigen)               | Surface polysaccharides, lipopolysaccharides and antigens   |
| YPO1304 |  |  |            | <i>psaB</i>                          | Chaperone protein PsaB precursor               | Chaperones, chaperonins, heat shock                         |
| YPO1305 |  |  |            | <i>psaC</i>                          | Outer membrane usher protein I                 | Surface structures                                          |
| YPO1307 |  |  |            |                                      | Putative membrane protein                      | Membranes, lipoproteins and porins                          |
| YPO1309 |  |  |            | <i>lysP, cadR</i>                    | Putative lysine-specific permease              | Transport/binding Amino acids and amines                    |
| YPO1310 |  |  |            | <i>yuA</i>                           | Putative periplasmic substrate-binding protein | Transport/binding proteins                                  |
| YPO1311 |  |  |            | <i>yuB</i>                           | Putative FecCD-family membrane protein         | Transport/binding proteins                                  |
| YPO1312 |  |  |            | <i>yuC</i>                           | Putative siderophore ABC transporter           | Transport/binding proteins                                  |
| YPO1313 |  |  |            | <i>yuR</i>                           | Putative outer membrane protein                | Cell envelope                                               |
| YPO1321 |  |  |            | <i>sdaC, dcrA</i>                    | Serine transporter                             | Transport/binding Amino acids and amines                    |
| YPO1325 |  |  |            |                                      | Putative membrane protein                      | Membranes, lipoproteins and porins                          |
| YPO1326 |  |  |            |                                      | TrkA, Potassium channel-family                 | Transport/binding Cations                                   |
| YPO1330 |  |  |            |                                      | Conserved hypothetical protein                 | Unknown                                                     |
| YPO1349 |  |  |            | <i>artM</i>                          | Arginine transport system permease             | Transport/binding Amino acids and amines                    |
| YPO1350 |  |  |            | <i>artQ</i>                          | Arginine transport system permease             | Transport/binding Amino acids and amines                    |
| YPO1351 |  |  |            | <i>artI</i>                          | Arginine-binding periplasmic protein           | Transport/binding Amino acids and amines                    |
| YPO1353 |  |  |            |                                      | Putative chorismate mutase                     | Central intermediary metabolism                             |
| YPO1354 |  |  |            |                                      | Putative lipoprotein                           | Membranes, lipoproteins and porins                          |
| YPO1356 |  |  |            |                                      | Putative membrane protein                      | Membranes, lipoproteins and porins                          |
| YPO1357 |  |  |            | <i>ltaA</i>                          | L-allo-threonine aldolase                      | Serine family biosynthesis                                  |
| YPO1358 |  |  |            | <i>poxB</i>                          | Pyruvate dehydrogenase [cytoplasmic]           | Pyruvate dehydrogenase                                      |
| YPO1360 |  |  |            | <i>hcp</i>                           | Putative prismatic protein homolog             | Unknown                                                     |
| YPO1363 |  |  |            |                                      | Putative virulence factor                      | Pathogenicity                                               |
| YPO1366 |  |  |            | <i>cspD, cspH</i>                    | Cold shock-like protein                        | Adaptions and atypical conditions                           |
| YPO1368 |  |  |            | <i>clpA, lopD</i>                    | ATP-dependent Clp protease ATP-binding subunit | Degradation of Proteins, peptides and glycopeptides         |
| YPO1370 |  |  |            | <i>infA</i>                          | Translation initiation factor IF-1             | Protein translation and modification                        |
| YPO1373 |  |  |            | <i>cydD, htrD</i>                    | Transport ATP-binding protein                  | Transport/binding proteins                                  |

|          |  |  |                                   |                                                                                               |
|----------|--|--|-----------------------------------|-----------------------------------------------------------------------------------------------|
| YPO1380  |  |  | Putative membrane protein         | Membranes, lipoproteins and porins                                                            |
| YPO1383  |  |  | <i>pflB, pfl</i>                  | Formate acetyltransferase 1<br>Anaerobic respiration                                          |
| YPO1384  |  |  | <i>focA</i>                       | Putative formate transporter 1<br>Transport/binding Carbohydrates,organic acids and alcohols  |
| YPO1385  |  |  | Conserved hypothetical protein    | Unknown                                                                                       |
| YPO1386  |  |  | <i>ansB</i>                       | Putative L-asparaginase II precu<br>Degradation of amino acids                                |
| YPO1395  |  |  | <i>msbA</i>                       | Probable transport ATP-binding<br>Transport/binding proteins                                  |
| YPO1398  |  |  | <i>cspB</i>                       | Cold shock-like protein<br>Adaptions and atypical conditions                                  |
| YPO1404  |  |  | <i>mukE, kicA</i>                 | Conserved hypothetical protein<br>Unknown                                                     |
| YPO1405  |  |  | <i>mukB</i>                       | Cell division protein<br>Cell division                                                        |
| YPO1407  |  |  | Putative exported protein         | Membranes, lipoproteins and porins                                                            |
| YPO1408  |  |  | Putative exported protein         | Membranes, lipoproteins and porins                                                            |
| YPO1409  |  |  | Metallo-beta-lactamase superfar   | Unknown                                                                                       |
| YPO1411  |  |  | Putative outer membrane porin     | Cell envelop                                                                                  |
| YPO1412  |  |  | <i>asnS, tss</i>                  | Asparaginyl-tRNA synthetase<br>Aminoacyl tRNA synthetases and their modification              |
| YPO1417  |  |  | Putative iron-sulfur binding prot | Unknown                                                                                       |
| YPO1418  |  |  | Conserved hypothetical protein    | Unknown                                                                                       |
| YPO1420  |  |  | <i>pqiA</i>                       | Putative paraquat-inducible prot<br>Membranes, lipoproteins and porins                        |
| YPO1423a |  |  | <i>rmf</i>                        | Putative ribosome modulation f<br>Ribosome maturation and modification                        |
| YPO1430  |  |  | <i>fabA</i>                       | 3-hydroxydecanoyl-[acyl-carrie<br>Fatty acid biosynthesis                                     |
| YPO1431  |  |  | Putative Lon protease             | Unknown                                                                                       |
| YPO1435  |  |  | <i>ompA, tolG,</i>                | Putative outer membrane porin<br>Cell envelop                                                 |
| YPO1443  |  |  | Conserved hypothetical protein    | Unknown                                                                                       |
| YPO1444  |  |  | Conserved hypothetical protein    | Unknown                                                                                       |
| YPO1445  |  |  | Conserved hypothetical protein    | Unknown                                                                                       |
| YPO1447  |  |  | Putative sulfite reductase subuni | Sulphur metabolism                                                                            |
| YPO1463  |  |  | Putative acyl transferase         | Fatty acid biosynthesis                                                                       |
| YPO1474  |  |  | Putative exported protein         | Membranes, lipoproteins and porins                                                            |
| YPO1491  |  |  | <i>ybiT</i>                       | ABC transporter ATP-binding p<br>Transport/binding proteins                                   |
| YPO1499  |  |  | Putative membrane protein         | Membranes, lipoproteins and porins                                                            |
| YPO1501  |  |  | Putative esterase                 | Unknown                                                                                       |
| YPO1505  |  |  | <i>folE</i>                       | GTP cyclohydrolase I<br>Folic acid Biosynthesis                                               |
| YPO1507  |  |  | <i>mgIB</i>                       | Galactose-binding protein<br>Transport/binding Carbohydrates,organic acids and alcohols       |
| YPO1508  |  |  | <i>mgIA</i>                       | Galactoside transport ATP-bindi<br>Transport/binding Carbohydrates,organic acids and alcohols |
| YPO1509  |  |  | <i>mgIC</i>                       | Galactoside permease<br>Transport/binding Carbohydrates,organic acids and alcohols            |
| YPO1511  |  |  | <i>sfcA, maeA</i>                 | NAD-dependent malic enzyme<br>Gluconeogenesis                                                 |
| YPO1512  |  |  | <i>cdd</i>                        | Cytidine deaminase<br>Salvage of nucleosides and nucleotides                                  |
| YPO1513  |  |  | <i>yohK</i>                       | Putative membrane protein<br>Membranes, lipoproteins and porins                               |
| YPO1517  |  |  | Putative sugar ABC transporter    | Transport/binding Carbohydrates,organic acids and alcohols                                    |
| YPO1522  |  |  | <i>metG</i>                       | Methionyl-tRNA synthetase<br>Aminoacyl tRNA synthetases and their modification                |
| YPO1524  |  |  | <i>udk, b266</i>                  | Uridine kinase<br>Miscellaneous nucleoside/nucleotide reactions                               |
| YPO1525  |  |  | <i>dcd, dus, pa</i>               | Deoxycytidine triphosphate dea<br>-deoxyribonucleotide biosynthesis                           |

|         |   |                       |                                             |                                                             |
|---------|---|-----------------------|---------------------------------------------|-------------------------------------------------------------|
| YPO1528 |   | <i>ysuF, fhuF</i>     | Putative ferric iron reductase              | Electron transport                                          |
| YPO1531 |   | <i>alcB</i>           | Putative siderophore biosynthetic           | Iron uptake                                                 |
| YPO1537 |   | <i>ysuR</i>           | Putative iron-siderophore receptor          | Iron uptake                                                 |
| YPO1540 | ■ | <i>galF</i>           | UTP-glucose-1-phosphate uridylyltransferase | Galactose operon                                            |
| YPO1541 | ■ | <i>gnd</i>            | 6-phosphogluconate dehydrogenase            | Pentose phosphate pathway                                   |
| YPO1547 |   | <i>hisC</i>           | Histidinol-phosphate aminotransferase       | Histidine biosynthesis                                      |
| YPO1548 |   | <i>hisD</i>           | Histidinol dehydrogenase                    | Histidine biosynthesis                                      |
| YPO1551 |   |                       | Putative exported protein                   | Membranes, lipoproteins and porins                          |
| YPO1557 |   | <i>yeeF</i>           | Amino acid permease                         | Transport/binding Amino acids and amines                    |
| YPO1559 | ■ |                       | Hypothetical protein                        | Unknown                                                     |
| YPO1563 |   |                       | Putative transmembrane transporter          | Transport/binding proteins                                  |
| YPO1566 |   |                       | Putative hydrolase                          | Unknown                                                     |
| YPO1567 |   |                       | Putative racemase                           | Unknown                                                     |
| YPO1570 |   | <i>argG</i>           | Argininosuccinate synthase                  | Glutamate family biosynthesis                               |
| YPO1573 |   |                       | Putative polysaccharide deacetylase         | Unknown                                                     |
| YPO1575 |   |                       | 225 conserved hypothetical protein          | Unknown                                                     |
| YPO1584 |   |                       | Conserved hypothetical protein              | Unknown                                                     |
| YPO1594 | ■ |                       | Conserved hypothetical protein              | Unknown                                                     |
| YPO1595 |   | <i>rpmF</i>           | Ribosomal protein L32                       | Ribosomal protein synthesis and modification                |
| YPO1596 | ■ | <i>plsX</i>           | Fatty acid, phospholipid synthase           | Synthesis and modification of Phospholipids                 |
| YPO1597 |   | <i>fabH</i>           | 3-oxoacyl-[acyl-carrier-protein] synthase   | Fatty acid biosynthesis                                     |
| YPO1601 |   | <i>fabF, fabJ</i>     | 3-oxoacyl-[acyl-carrier-protein] synthase   | Fatty acid biosynthesis                                     |
| YPO1603 | ■ | <i>pabC</i>           | 4-amino-4-deoxychorismate lyase             | Folic acid Biosynthesis                                     |
| YPO1607 | ■ |                       | Putative deoxyribonuclease                  | Unknown                                                     |
| YPO1608 | ■ | <i>ptsG, glcA</i>     | PTS system, glucose-specific II             | Transport/binding Carbohydrates, organic acids and alcohols |
| YPO1618 | ■ |                       | Hypothetical protein                        | Unknown                                                     |
| YPO1626 |   | <i>lolC</i>           | Lipoprotein releasing system, translocator  | Membranes, lipoproteins and porins                          |
| YPO1627 |   | <i>lolD</i>           | Lipoprotein releasing system, translocator  | Membranes, lipoproteins and porins                          |
| YPO1628 |   | <i>lolE</i>           | Lipoprotein releasing system, translocator  | Membranes, lipoproteins and porins                          |
| YPO1630 |   | <i>cobB</i>           | Putative Sir2 family protein                | Unknown                                                     |
| YPO1636 |   | <i>purB</i>           | Adenylosuccinate lyase                      | Purine ribonucleotide biosynthesis                          |
| YPO1637 |   |                       | Conserved hypothetical protein              | Unknown                                                     |
| YPO1638 |   | <i>trmU, asuE</i>     | tRNA (5-methylaminomethyl-2-thiouridine)    | Aminoacyl tRNA synthetases and their modification           |
| YPO1641 |   | <i>icdA, icd, icd</i> | Isocitrate dehydrogenase [NADP+]            | Tricarboxylic acid cycle                                    |
| YPO1645 | ■ |                       | Conserved hypothetical protein              | Unknown                                                     |
| YPO1649 | ■ |                       | Conserved hypothetical protein              | Unknown                                                     |
| YPO1650 |   |                       | Hypothetical protein                        | Unknown                                                     |
| YPO1652 | ■ | <i>ylaC</i>           | Putative membrane protein                   | Membranes, lipoproteins and porins                          |
| YPO1654 |   | <i>lacZ</i>           | Beta-galactosidase                          | Lactose operon                                              |
| YPO1655 |   | <i>cspC, msmE</i>     | Cold shock protein                          | Adaptions and atypical conditions                           |
| YPO1659 | ■ |                       | Hypothetical protein                        | Unknown                                                     |

|         |   |   |                       |                                                 |                                                             |
|---------|---|---|-----------------------|-------------------------------------------------|-------------------------------------------------------------|
| YPO1660 |   |   | <i>mgtC</i>           | Mg(2+) transport ATPase protein                 | Pathogenicity                                               |
| YPO1661 |   |   | <i>mgtB</i>           | Mg(2+) transport ATPase protein                 | Pathogenicity                                               |
| YPO1683 | ■ | ■ |                       | Probable N-acetylmuramoyl-L-tyrosine hydrolase  | Degradation of Proteins, peptides and glycopeptides         |
| YPO1684 | ■ |   |                       | Putative membrane protein (pseudogene)          | Membranes, lipoproteins and porins                          |
| YPO1686 | ■ |   |                       | Putative exported protein                       | Membranes, lipoproteins and porins                          |
| YPO1688 |   | ■ |                       | Hypothetical protein                            | Unknown                                                     |
| YPO1694 |   |   |                       | Conserved hypothetical protein                  | Unknown                                                     |
| YPO1702 |   |   | <i>yebS</i>           | Putative membrane protein                       | Membranes, lipoproteins and porins                          |
| YPO1705 | ■ |   | <i>prc, tsp</i>       | Tail-specific protease precursor                | Degradation of Proteins, peptides and glycopeptides         |
| YPO1706 | ■ | ■ | <i>htpX</i>           | Putative heat shock protein                     | Adaptions and atypical conditions                           |
| YPO1713 |   |   | <i>ogl</i>            | Oligogalacturonate lyase                        | Degradation of Proteins, peptides and glycopeptides         |
| YPO1714 | ■ |   | <i>kdgR</i>           | IcIR-family transcriptional regulator           | Broad regulatory functions                                  |
| YPO1715 |   |   | <i>ybjR, b867</i>     | Probable N-acetylmuramoyl-L-tyrosine hydrolase  | Murein sacculus and peptidoglycan                           |
| YPO1718 |   |   |                       | Putative exported protein                       | Membranes, lipoproteins and porins                          |
| YPO1735 |   |   |                       | Putative ABC transporter (ATP-binding domain)   | Transport/binding proteins                                  |
| YPO1743 |   |   | <i>aroP</i>           | Aromatic amino acid transport protein           | Transport/binding Amino acids and amines                    |
| YPO1744 |   |   | <i>pagP</i>           | Putative exported protein                       | Membranes, lipoproteins and porins                          |
| YPO1753 |   |   | <i>fcuA</i>           | Ferrichrome receptor protein                    | Cell envelope                                               |
| YPO1754 | ■ | ■ | <i>yebN</i>           | Putative membrane protein                       | Membranes, lipoproteins and porins                          |
| YPO1755 |   |   | <i>yobD</i>           | Putative membrane protein                       | Membranes, lipoproteins and porins                          |
| YPO1757 | ■ |   | <i>manY, ptsP</i>     | PTS system, mannose-specific IIC <sub>Man</sub> | Transport/binding Carbohydrates, organic acids and alcohols |
| YPO1758 | ■ |   | <i>manX, ptsL</i>     | PTS system, mannose-specific IIC <sub>Man</sub> | Transport/binding Carbohydrates, organic acids and alcohols |
| YPO1764 | ■ |   | <i>hpaD</i>           | 3,4-dihydroxyphenylacetate 2,3-dioxygenase      | Degradation of carbon compounds                             |
| YPO1765 | ■ |   | <i>hpaF</i>           | 5-carboxymethyl-2-hydroxymethyl-3-thioesterase  | Degradation of carbon compounds                             |
| YPO1770 |   |   | <i>hpaC</i>           | 4-hydroxyphenylacetate 3-monooxygenase          | Degradation of carbon compounds                             |
| YPO1773 |   |   | <i>pabB</i>           | Para-aminobenzoate synthase class II            | Folic acid Biosynthesis                                     |
| YPO1778 |   |   |                       | Conserved hypothetical protein                  | Unknown                                                     |
| YPO1779 |   |   |                       | Putative exported protein                       | Membranes, lipoproteins and porins                          |
| YPO1783 |   |   | <i>ftnA, ftn, rsf</i> | Ferritin                                        | Iron uptake                                                 |
| YPO1784 | ■ |   |                       | Putative copper resistance protein              | Detoxification                                              |
| YPO1828 |   | ■ | <i>flhI, fla BII</i>  | Flagellar assembly protein FliH                 | Chemotaxis and mobility                                     |
| YPO1847 |   | ■ | <i>yecS</i>           | Putative amino-acid ABC transporter             | Transport/binding Amino acids and amines                    |
| YPO1848 |   | ■ | <i>yecC</i>           | Putative amino-acid ABC transporter             | Transport/binding Amino acids and amines                    |
| YPO1849 | ■ |   |                       | Conserved hypothetical protein                  | Unknown                                                     |
| YPO1850 | ■ |   |                       | Hypothetical protein                            | Unknown                                                     |
| YPO1851 | ■ |   | <i>putA, poaA</i>     | Bifunctional PutA protein [including PutA]      | Degradation of amino acids                                  |
| YPO1852 | ■ |   |                       | Putative membrane protein                       | Membranes, lipoproteins and porins                          |
| YPO1853 | ■ |   | <i>putP</i>           | Proline permease                                | Transport/binding Amino acids and amines                    |
| YPO1854 |   | ■ |                       | Putative membrane protein                       | Membranes, lipoproteins and porins                          |
| YPO1855 |   | ■ |                       | Putative exported protein                       | Membranes, lipoproteins and porins                          |
| YPO1856 |   | ■ |                       | Conserved hypothetical protein                  | Unknown                                                     |

|          |  |  |                  |                                              |                                                                     |
|----------|--|--|------------------|----------------------------------------------|---------------------------------------------------------------------|
| YPO1857  |  |  | <i>wrbA</i>      | Trp repressor binding protein                | Broad regulatory functions                                          |
| YPO1858  |  |  |                  | Putative exported protein                    | Membranes, lipoproteins and porins                                  |
| YPO1866  |  |  | <i>uvrC</i>      | Excinuclease ABC subunit C                   | DNA replication, restriction/modification, recombination and repair |
| YPO1867  |  |  | <i>pgsA</i>      | CDP-diacylglycerol--glycerol-3               | Synthesis and modification of Phospholipids                         |
| YPO1871  |  |  |                  | Hypothetical protein                         | Unknown                                                             |
| YPO1883  |  |  |                  | Hypothetical protein (pseudogen)             | Unknown                                                             |
| YPO1917  |  |  |                  | Integrase                                    |                                                                     |
| YPO1921  |  |  |                  | Probable pili assembly chaperon              | Chaperones, chaperonins, heat shock                                 |
| YPO1926  |  |  | <i>ripA</i>      | Putative 4-hydroxybutyrate coenzyme          | Fatty acid biosynthesis                                             |
| YPO1932  |  |  |                  | Putative sugar transporter                   | Transport/binding Carbohydrates, organic acids and alcohols         |
| YPO1942  |  |  |                  | Putative exported protein                    | Membranes, lipoproteins and porins                                  |
| YPO1956  |  |  |                  | Hypothetical protein                         | Unknown                                                             |
| YPO1968  |  |  |                  | Transposase for insertion sequence           |                                                                     |
| YPO1969  |  |  |                  | Putative IS100 transposase                   |                                                                     |
| YPO1986  |  |  |                  | Putative exported protein                    | Membranes, lipoproteins and porins                                  |
| YPO1992  |  |  |                  | Conserved hypothetical protein               | Unknown                                                             |
| YPO1993  |  |  |                  | Putative dehydrogenase                       | Unknown                                                             |
| YPO1994  |  |  |                  | Hypothetical protein                         | Unknown                                                             |
| YPO1995  |  |  |                  | Hypothetical protein                         | Unknown                                                             |
| YPO1996  |  |  |                  | Hypothetical protein                         | Unknown                                                             |
| YPO2010  |  |  | <i>ychF</i>      | Conserved hypothetical protein               | Unknown                                                             |
| YPO2011  |  |  | <i>pth</i>       | Peptidyl-tRNA hydrolase                      | Aminoacyl tRNA synthetases and their modification                   |
| YPO2012  |  |  |                  | Putative membrane protein                    | Membranes, lipoproteins and porins                                  |
| YPO2013  |  |  | <i>prsA, prs</i> | Ribose-phosphate pyrophosphorylase           | Sugar nucleotides metabolism                                        |
| YPO2018  |  |  |                  | Putative protoporphyrinogen oxidase          | Heme and porphyrin Biosynthesis                                     |
| YPO2038  |  |  |                  | Conserved hypothetical protein               | Unknown                                                             |
| YPO2040  |  |  |                  | Putative membrane protein                    | Membranes, lipoproteins and porins                                  |
| YPO2047  |  |  |                  | Conserved hypothetical protein               | Unknown                                                             |
| YPO2053  |  |  | <i>aspS, tls</i> | Aspartyl-tRNA synthetase                     | Aminoacyl tRNA synthetases and their modification                   |
| YPO2056  |  |  | <i>ruvC</i>      | Crossover junction endonuclease              | DNA replication, restriction/modification, recombination and repair |
| YPO2061  |  |  | <i>znuA</i>      | Exported high-affinity zinc uptake protein   | Transport/binding Cations                                           |
| YPO2073  |  |  |                  | Putative lipoprotein                         | Membranes, lipoproteins and porins                                  |
| YPO2074  |  |  | <i>fadD</i>      | Long-chain-fatty-acid-CoA ligase             | Degradation of small molecule                                       |
| YPO2075  |  |  | <i>rnd</i>       | Ribonuclease D                               | Degradation of RNA                                                  |
| YPO2076  |  |  | <i>minE</i>      | Cell division topological specificity factor | Cell division                                                       |
| YPO2077  |  |  | <i>minD</i>      | Septum site-determining protein              | Cell division                                                       |
| YPO2078  |  |  | <i>minC</i>      | Cell division inhibitor                      | Cell division                                                       |
| YPO2087a |  |  |                  | Putative phage protein                       | Phage-related functions and prophage                                |
| YPO2145  |  |  |                  | Conserved hypothetical protein               | Unknown                                                             |
| YPO2152  |  |  |                  | Conserved hypothetical protein               | Unknown                                                             |
| YPO2153  |  |  |                  | Conserved hypothetical protein               | Unknown                                                             |





|         |   |   |                                 |                                                                                                           |
|---------|---|---|---------------------------------|-----------------------------------------------------------------------------------------------------------|
| YPO2363 |   |   | Conserved hypothetical protein  | Unknown                                                                                                   |
| YPO2364 |   |   | Insertion sequence IS100, ATP-I |                                                                                                           |
| YPO2367 |   |   | <i>gst</i>                      | Glutathione S-transferase Thioredoxin Biosynthesis                                                        |
| YPO2368 |   |   | <i>pdxY</i>                     | Pyridoxamine kinase Central intermediary metabolism                                                       |
| YPO2369 |   |   | <i>tyrS</i>                     | Tyrosyl-tRNA synthetase Aminoacyl tRNA synthetases and their modification                                 |
| YPO2370 |   |   | <i>pdxH</i>                     | Pyridoxamine 5'-phosphate oxidase Pyridoxine Biosynthesis                                                 |
| YPO2374 | ■ |   | <i>slyA, rovA</i>               | MarR-family transcriptional regulator Broad regulatory functions                                          |
| YPO2386 |   |   | <i>sodB</i>                     | Superoxide dismutase [Fe] Detoxification                                                                  |
| YPO2387 |   |   | <i>purR</i>                     | Purine nucleotide synthesis repressor Broad regulatory functions                                          |
| YPO2390 |   | ■ | <i>cfa, cdfA</i>                | Cyclopropane-fatty-acyl-phospholipase Fatty acid biosynthesis                                             |
| YPO2394 |   |   | <i>lpp, mlpA</i>                | Major outer membrane lipoproteins Membranes, lipoproteins and porins                                      |
| YPO2398 |   |   |                                 | Putative exported protein (pseudoprotein) Membranes, lipoproteins and porins                              |
| YPO2399 |   |   | <i>sufE</i>                     | Conserved hypothetical protein Unknown                                                                    |
| YPO2400 |   |   | <i>sufS</i>                     | Putative selenocysteine lyase Central intermediary metabolism                                             |
| YPO2401 |   |   | <i>sufD</i>                     | Conserved hypothetical protein Unknown                                                                    |
| YPO2402 |   |   | <i>sufC</i>                     | Putative ATP-dependent transposase Transport/binding proteins                                             |
| YPO2403 |   |   | <i>sufB</i>                     | Conserved hypothetical protein Unknown                                                                    |
| YPO2404 |   |   | <i>sufA</i>                     | Conserved hypothetical protein Unknown                                                                    |
| YPO2416 |   |   |                                 | Putative membrane protein Membranes, lipoproteins and porins                                              |
| YPO2421 | ■ |   | <i>pmrF</i>                     | Probable glycosyl transferase Unknown                                                                     |
| YPO2427 | ■ |   | <i>ihfA, himA,</i>              | Integration host factor alpha-subunit DNA replication, restriction/modification, recombination and repair |
| YPO2428 |   |   | <i>pheT</i>                     | Phenylalanyl-tRNA synthetase beta Aminoacyl tRNA synthetases and their modification                       |
| YPO2429 |   |   | <i>pheS</i>                     | Phenylalanyl-tRNA synthetase epsilon Aminoacyl tRNA synthetases and their modification                    |
| YPO2430 |   |   | <i>rplT, pdzA</i>               | 50S ribosomal protein L20 Ribosomal protein synthesis and modification                                    |
| YPO2436 |   |   |                                 | Hypothetical protein Unknown                                                                              |
| YPO2439 |   |   | <i>yfeA</i>                     | Periplasmic-binding protein Transport/binding Cations                                                     |
| YPO2440 |   |   | <i>yfeB</i>                     | ATP-binding transport protein Transport/binding Cations                                                   |
| YPO2441 |   |   | <i>yfeC</i>                     | Chelated iron transport system repressor Transport/binding Cations                                        |
| YPO2442 |   |   | <i>yfeD</i>                     | Chelated iron transport system repressor Transport/binding Cations                                        |
| YPO2443 |   |   |                                 | Putative membrane protein Membranes, lipoproteins and porins                                              |
| YPO2444 | ■ |   |                                 | Conserved hypothetical protein Unknown                                                                    |
| YPO2448 |   |   | <i>solA, soxA</i>               | Putative sarcosine oxidase Unknown                                                                        |
| YPO2449 |   |   |                                 | Putative LuxR-family regulatory protein Broad regulatory functions                                        |
| YPO2452 |   |   |                                 | Hypothetical protein Unknown                                                                              |
| YPO2456 |   |   | <i>ypeI</i>                     | N-acylhomoserine lactone synthase AHL                                                                     |
| YPO2457 |   |   | <i>ypeR</i>                     | Quorum-sensing transcriptional activator AHL                                                              |
| YPO2486 | ■ |   |                                 | Conserved hypothetical protein Unknown                                                                    |
| YPO2501 |   |   | <i>rbsB</i>                     | Sugar binding protein precursor Transport/binding Carbohydrates, organic acids and alcohols               |
| YPO2502 | ■ |   | <i>gutB</i>                     | Putative zinc-binding dehydrogenase Unknown                                                               |
| YPO2506 |   |   | <i>ompX, ompY</i>               | Putative outer membrane protein Cell envelope                                                             |
| YPO2510 | ■ |   | <i>dps</i>                      | Putative DNA-binding protein Adaptions and atypical conditions                                            |

|         |  |  |                   |                                  |                                          |
|---------|--|--|-------------------|----------------------------------|------------------------------------------|
| YPO2512 |  |  | <i>glnH</i>       | Putative glutamine-binding peri  | Transport/binding Amino acids and amines |
| YPO2531 |  |  | <i>elaB</i>       | Putative membrane protein        | Membranes, lipoproteins and porins       |
| YPO2536 |  |  |                   | Putative D-isomer specific 2-hy  | Unknown                                  |
| YPO2539 |  |  | <i>idnO</i>       | Gluconate 5-dehydrogenase        | Degradation of carbon compounds          |
| YPO2540 |  |  | <i>idnK, gntV</i> | Putative thermosensitive glucon  | Degradation of carbon compounds          |
| YPO2541 |  |  |                   | Conserved hypothetical protein   | Unknown                                  |
| YPO2558 |  |  | <i>aat</i>        | Probable aminotransferase        | Unknown                                  |
| YPO2559 |  |  |                   | Conserved hypothetical protein   | Unknown                                  |
| YPO2565 |  |  |                   | Hypothetical protein             | Unknown                                  |
| YPO2574 |  |  |                   | Putative membrane protein        | Membranes, lipoproteins and porins       |
| YPO2577 |  |  |                   | Putative aldehyde dehydrogenas   | Unknown                                  |
| YPO2578 |  |  |                   | Putative thiamine pyrophosphat   | Degradation of carbon compounds          |
| YPO2579 |  |  |                   | Putative myo-inositol dehydrog   | Degradation of carbon compounds          |
| YPO2590 |  |  |                   | Hypothetical protein             | Unknown                                  |
| YPO2595 |  |  | <i>cspE</i>       | Putative cold shock protein      | Adaptions and atypical conditions        |
| YPO2597 |  |  | <i>tatE</i>       | Sec-independent protein translo  | Transport/binding proteins               |
| YPO2604 |  |  | <i>pbpA, mrdA</i> | Penicillin-binding protein 2     | Murein sacculus and peptidoglycan        |
| YPO2605 |  |  |                   | Conserved hypothetical protein   | Unknown                                  |
| YPO2606 |  |  |                   | Conserved hypothetical protein   | Unknown                                  |
| YPO2607 |  |  | <i>nadD</i>       | Putative nicotinate-nucleotide a | Unknown                                  |
| YPO2611 |  |  |                   | Conserved hypothetical protein   | Unknown                                  |
| YPO2615 |  |  | <i>glnH</i>       | Putative amino acid-binding pro  | Transport/binding Amino acids and amines |
| YPO2616 |  |  | <i>cutE, lnt</i>  | Putative apolipoprotein N-acylt  | Membranes, lipoproteins and porins       |
| YPO2623 |  |  | <i>asnB</i>       | Asparagine synthetase B          | Aspartate family biosynthesis            |
| YPO2626 |  |  | <i>nagA</i>       | Putative N-acetylglucosamine-6   | Amino sugars metabolism                  |
| YPO2635 |  |  | <i>fldA</i>       | Flavodoxin 1                     | Electron transport                       |
| YPO2637 |  |  |                   | Conserved hypothetical protein   | Unknown                                  |
| YPO2645 |  |  | <i>proX, proU</i> | Glycine betaine-binding peripla: | Transport/binding Amino acids and amines |
| YPO2646 |  |  | <i>proW</i>       | Glycine betaine,L-proline transp | Transport/binding Amino acids and amines |
| YPO2647 |  |  | <i>proV</i>       | Glycine betaine,L-proline transp | Transport/binding Amino acids and amines |
| YPO2648 |  |  | <i>nrdF</i>       | Ribonucleoside-diphosphate red   | Sugar nucleotides metabolism             |
| YPO2649 |  |  | <i>nrdE</i>       | Ribonucleoside-diphosphate red   | Sugar nucleotides metabolism             |
| YPO2650 |  |  | <i>nrdI</i>       | NrdI protein homologue           | Unknown                                  |
| YPO2651 |  |  | <i>nrdH</i>       | Putative glutaredoxin            | Sugar nucleotides metabolism             |
| YPO2659 |  |  | <i>cspB</i>       | Cold shock protein               | Adaptions and atypical conditions        |
| YPO2665 |  |  | <i>ureA, yeuA</i> | Urease gamma subunit             | Pathogenicity                            |
| YPO2666 |  |  | <i>ureB, yeuB</i> | Urease beta subunit              | Pathogenicity                            |
| YPO2667 |  |  | <i>ureC, yeuC</i> | Urease alpha subunit             | Pathogenicity                            |
| YPO2668 |  |  | <i>ureE</i>       | Urease accessory protein         | Pathogenicity                            |
| YPO2669 |  |  | <i>ureF</i>       | Urease accessory protein         | Pathogenicity                            |
| YPO2670 |  |  | <i>ureG</i>       | Urease accessory protein         | Membranes, lipoproteins and porins       |

|         |   |   |   |                   |                                    |                                                                     |
|---------|---|---|---|-------------------|------------------------------------|---------------------------------------------------------------------|
| YPO2671 |   |   |   | <i>ureD</i>       | Urease accessory protein (pseud    | Pathogenicity                                                       |
| YPO2672 | ■ |   |   |                   | Putative urea transporter          | Transport/binding Amino acids and amines                            |
| YPO2674 | ■ | ■ |   |                   | Putative exported protein          | Membranes, lipoproteins and porins                                  |
| YPO2675 |   |   | ■ |                   | Putative potassium channel prot    | Transport/binding Cations                                           |
| YPO2676 | ■ |   |   |                   | Putative membrane protein          | Membranes, lipoproteins and porins                                  |
| YPO2693 |   | ■ |   | <i>ybfA</i>       | Putative membrane protein          | Membranes, lipoproteins and porins                                  |
| YPO2695 |   |   | ■ | <i>phrB, phr</i>  | Putative deoxyribodipyrimidine     | DNA replication, restriction/modification, recombination and repair |
| YPO2696 | ■ |   |   |                   | Putative 3',5'-cyclic-nucleotide j | Degradation of small molecule                                       |
| YPO2699 | ■ |   |   |                   | Conserved hypothetical protein     | Unknown                                                             |
| YPO2703 |   | ■ |   | <i>pcp</i>        | Putative pyrrolidone-carboxylat    | Degradation of Proteins, peptides and glycopeptides                 |
| YPO2704 |   |   | ■ | <i>ung</i>        | Putative uracil-DNA glycosylas     | DNA replication, restriction/modification, recombination and repair |
| YPO2705 | ■ | ■ | ■ |                   | Conserved hypothetical protein     | Unknown                                                             |
| YPO2708 |   |   | ■ | <i>srmB, rbaB</i> | ATP-dependent RNA helicase         | RNA synthesis, RNA modification and DNA transcription               |
| YPO2710 | ■ |   |   | <i>nadB, nicB</i> | L-aspartate oxidase                | Pyridine nucleotide Biosynthesis                                    |
| YPO2711 | ■ |   |   | <i>rpoE, sigE</i> | RNA polymerase sigma E factor      | RNA synthesis, RNA modification and DNA transcription               |
| YPO2712 | ■ |   |   | <i>rseA, mclA</i> | Sigma E factor negative regulat    | Broad regulatory functions                                          |
| YPO2713 | ■ |   |   | <i>rseB</i>       | Sigma E factor regulatory protei   | Broad regulatory functions                                          |
| YPO2714 | ■ |   |   | <i>rseC</i>       | Sigma E factor regulatory protei   | Broad regulatory functions                                          |
| YPO2720 | ■ |   |   | <i>recO</i>       | DNA repair protein                 | DNA replication, restriction/modification, recombination and repair |
| YPO2731 | ■ |   | ■ |                   | Putative membrane protein          | Membranes, lipoproteins and porins                                  |
| YPO2740 |   |   |   | <i>ccmG, dsbE</i> | Thiol:disulfide interchange prot   | Heme and porphyrin Biosynthesis                                     |
| YPO2744 |   |   | ■ | <i>fadL, ttr</i>  | Putative long-chain fatty acid tr  | Transport/binding Carbohydrates,organic acids and alcohols          |
| YPO2745 |   |   |   |                   | Conserved hypothetical protein     | Unknown                                                             |
| YPO2746 |   |   |   |                   | Putative 3-ketoacyl-CoA thiolas    | Degradation of small molecule                                       |
| YPO2748 | ■ |   |   | <i>sixA</i>       | Putative phosphohistidine phosf    | Broad regulatory functions                                          |
| YPO2753 |   |   | ■ | <i>yfcA</i>       | Putative membrane protein          | Membranes, lipoproteins and porins                                  |
| YPO2755 |   |   |   |                   | Conserved hypothetical protein     | Unknown                                                             |
| YPO2757 | ■ |   | ■ | <i>fabB, fabC</i> | 3-oxoacyl-[acyl-carrier-protein]   | Fatty acid biosynthesis                                             |
| YPO2767 | ■ |   |   | <i>dedA</i>       | Putative membrane protein          | Membranes, lipoproteins and porins                                  |
| YPO2771 |   |   |   | <i>cvpA, dedE</i> | Putative colicin V production pr   | Colicin-related functions                                           |
| YPO2772 |   |   | ■ | <i>purF</i>       | Amidophosphoribosyltransferas      | Purine ribonucleotide biosynthesis                                  |
| YPO2774 |   |   | ■ | <i>hisJ</i>       | Histidine-binding periplasmic p    | Transport/binding Amino acids and amines                            |
| YPO2775 | ■ |   |   | <i>hisQ</i>       | Histidine transport system perm    | Transport/binding Amino acids and amines                            |
| YPO2778 | ■ |   | ■ |                   | Conserved hypothetical protein     | Unknown                                                             |
| YPO2780 |   |   | ■ |                   | Conserved hypothetical protein     | Unknown                                                             |
| YPO2795 |   |   |   |                   | Hypothetical protein               | Unknown                                                             |
| YPO2804 |   |   |   |                   | Hypothetical protein               | Unknown                                                             |
| YPO2805 | ■ |   | ■ |                   | Putative aldo,keto reductase       | Unknown                                                             |
| YPO2806 |   |   | ■ |                   | Putative aldo,keto reductase       | Unknown                                                             |
| YPO2815 |   | ■ |   |                   | Putative acyltransferase           | Unknown                                                             |
| YPO2827 |   |   |   | <i>upp, uraP</i>  | Uracil phosphoribosyltransferas    | Salvage of nucleosides and nucleotides                              |

|         |  |                       |                                  |                                                            |
|---------|--|-----------------------|----------------------------------|------------------------------------------------------------|
| YPO2830 |  | <i>speG</i>           | Spermidine acetyltransferase     | Polyamine synthesis                                        |
| YPO2836 |  | <i>ppk</i>            | Polyphosphate kinase             | Central intermediary metabolism                            |
| YPO2844 |  | <i>goaG, gabT</i>     | Putative aminobutyrate aminotr:  | Central intermediary metabolism                            |
| YPO2854 |  |                       | Conserved hypothetical protein   | Unknown                                                    |
| YPO2855 |  |                       | Putative protease                | Degradation of Proteins, peptides and glycopeptides        |
| YPO2857 |  | <i>ykfE, ivy</i>      | Putative exported protein        | Membranes, lipoproteins and porins                         |
| YPO2868 |  |                       | Conserved hypothetical protein   | Unknown                                                    |
| YPO2870 |  | <i>guaA</i>           | Putative GMP synthase            | Purine ribonucleotide biosynthesis                         |
| YPO2878 |  | <i>hisS</i>           | Histidyl-tRNA synthetase         | Aminoacyl tRNA synthetases and their modification          |
| YPO2893 |  |                       | Chaperone protein HscB           |                                                            |
| YPO2894 |  | <i>iscA,yfhF</i>      | Conserved hypothetical protein   | Unknown                                                    |
| YPO2895 |  | <i>nifU,iscU/yj</i>   | NifU family protein              | Unknown                                                    |
| YPO2896 |  | <i>iscS, nifS, yj</i> | Putative aminotransferase        | Unknown                                                    |
| YPO2897 |  | <i>yfhP</i>           | Conserved hypothetical protein   | Unknown                                                    |
| YPO2899 |  | <i>suhB</i>           | Putative inositol monophosphat:  | Unknown                                                    |
| YPO2904 |  | <i>hcaT</i>           | Putative transport permease pro  | Transport/binding Carbohydrates,organic acids and alcohols |
| YPO2905 |  | <i>ail</i>            | Attachment invasion locus prote  | Ail                                                        |
| YPO2907 |  | <i>glyA</i>           | Serine hydroxymethyltransferas   | Central intermediary metabolism                            |
| YPO2908 |  | <i>hmp, hmpA,</i>     | Flavoheomprotein                 | Aerobic respiration                                        |
| YPO2909 |  |                       | Conserved hypothetical protein   | Unknown                                                    |
| YPO2922 |  |                       | Putative membrane protein        | Murein sacculus and peptidoglycan                          |
| YPO2929 |  | <i>acpS, dpj</i>      | Holo-[acyl-carrier protein] synt | Fatty acid biosynthesis                                    |
| YPO2930 |  | <i>pdxJ</i>           | Pyridoxal phosphate biosyntheti  | Pyridoxine Biosynthesis                                    |
| YPO2958 |  | <i>sfuA, yfuA</i>     | Iron(III)-binding periplasmic pr | Transport/binding Cations                                  |
| YPO2969 |  |                       | Putative iron-sulphur protein    | Unknown                                                    |
| YPO2974 |  |                       | Putative B-type cytochrome       | Electron transport                                         |
| YPO2975 |  |                       | Putative aminotransferase        | Unknown                                                    |
| YPO2976 |  |                       | Conserved hypothetical protein   | Unknown                                                    |
| YPO2978 |  |                       | Putative membrane protein        | Membranes, lipoproteins and porins                         |
| YPO2983 |  | <i>nupC, cru</i>      | Nucleoside permease              | Transport/binding proteins                                 |
| YPO2984 |  | <i>gltX</i>           | Lutamyl-tRNA synthetase          | Aminoacyl tRNA synthetases and their modification          |
| YPO2990 |  | <i>zipA</i>           | Putative cell division protein   | Cell division                                              |
| YPO2991 |  | <i>cysZ</i>           | Putative membrane protein        | Membranes, lipoproteins and porins                         |
| YPO2993 |  | <i>ptsH, hpr</i>      | PTS system, phosphocarrier pro   | Transport/binding Carbohydrates,organic acids and alcohols |
| YPO2994 |  | <i>ptsI</i>           | PTS sytem, enzyme I componer     | Transport/binding Carbohydrates,organic acids and alcohols |
| YPO3001 |  |                       | Putative pyridine nucleotide-dis | Electron transport                                         |
| YPO3010 |  |                       | Hypothetical protein             | Unknown                                                    |
| YPO3013 |  | <i>cysW</i>           | Sulfate transport system permea  | Transport/binding Anions                                   |
| YPO3016 |  | <i>nanT</i>           | Putative sugar transporter       | Transport/binding Carbohydrates,organic acids and alcohols |
| YPO3019 |  |                       | Conserved hypothetical protein   | Unknown                                                    |
| YPO3020 |  |                       | Putative sugar kinase            | Unknown                                                    |

|         |   |   |   |                                |                                                                                                |
|---------|---|---|---|--------------------------------|------------------------------------------------------------------------------------------------|
| YPO3023 |   |   |   | Conserved hypothetical protein | Unknown                                                                                        |
| YPO3024 |   |   |   | <i>nanA, npl</i>               | Probable N-acetylneuraminat I Surface structures                                               |
| YPO3026 |   |   |   | <i>yfeY</i>                    | Putative lipoprotein Membranes, lipoproteins and porins                                        |
| YPO3027 |   |   |   | <i>ygiW</i>                    | Putative exported protein Membranes, lipoproteins and porins                                   |
| YPO3034 |   |   |   | <i>maeB</i>                    | NADP-dependent malic enzyme Gluconeogenesis                                                    |
| YPO3041 | ■ |   |   | <i>narP</i>                    | Nitrate,nitrite response regulato Broad regulatory functions                                   |
| YPO3047 |   |   |   | <i>ydeN</i>                    | Putative sulfatase Sulphur metabolism                                                          |
| YPO3048 | ■ |   |   |                                | Probable ABC-transporter, ATP Transport/binding proteins                                       |
| YPO3049 | ■ | ■ |   |                                | Putative binding protein-depend Transport/binding proteins                                     |
| YPO3050 | ■ | ■ |   |                                | Putative exported protein Membranes, lipoproteins and porins                                   |
| YPO3052 |   |   | ■ |                                | Conserved hypothetical protein Unknown                                                         |
| YPO3057 |   |   |   | <i>yeaL</i>                    | Putative membrane protein Membranes, lipoproteins and porins                                   |
| YPO3069 |   | ■ |   |                                | Putative exported protein Membranes, lipoproteins and porins                                   |
| YPO3070 | ■ | ■ |   | <i>yfgD</i>                    | Putative arsenate reductase Drug/analogue sensitivity                                          |
| YPO3077 |   |   | ■ | <i>purK</i>                    | Phosphoribosylaminoimidazole Purine ribonucleotide biosynthesis                                |
| YPO3079 |   |   | ■ | <i>ybbA</i>                    | Putative ABC transporter ATP-b Transport/binding proteins                                      |
| YPO3086 |   |   |   | <i>ybaR</i>                    | Putative cation-transporting ATI Transport/binding Cations                                     |
| YPO3094 |   |   | ■ | <i>rosB, ybaL</i>              | Putative potassium antiporter Transport/binding Cations                                        |
| YPO3118 |   |   | ■ | <i>adk, plsA, d</i>            | Adenylate kinase Purine ribonucleotide biosynthesis                                            |
| YPO3120 |   |   | ■ | <i>recR</i>                    | Recombination protein RecR DNA replication, restriction/modification, recombination and repair |
| YPO3123 | ■ |   |   | <i>apt</i>                     | Adenine phosphoribosyltransfer Salvage of nucleosides and nucleotides                          |
| YPO3128 |   |   | ■ |                                | Conserved hypothetical protein Unknown                                                         |
| YPO3137 |   | ■ |   |                                | Conserved hypothetical protein Unknown                                                         |
| YPO3138 |   | ■ |   | <i>ymoA</i>                    | Modulating protein YmoA (hist Broad regulatory functions                                       |
| YPO3140 |   |   | ■ | <i>ybaY</i>                    | Putative lipoprotein Membranes, lipoproteins and porins                                        |
| YPO3142 |   |   |   | <i>amtB</i>                    | Probable ammonium transporter Transport/binding Cations                                        |
| YPO3143 |   |   |   | <i>glnK</i>                    | Nitrogen regulatory protein P-II Broad regulatory functions                                    |
| YPO3151 |   |   |   |                                | Conserved hypothetical protein Unknown                                                         |
| YPO3153 |   |   | ■ | <i>ppiD</i>                    | Peptidyl-prolyl cis-trans isomer Protein translation and modification                          |
| YPO3154 |   |   | ■ | <i>hupB, hopD</i>              | DNA-binding protein HU-beta Adaptions and atypical conditions                                  |
| YPO3158 |   |   | ■ | <i>tig</i>                     | Trigger factor Cell division                                                                   |
| YPO3159 |   |   | ■ |                                | Hypothetical protein Unknown                                                                   |
| YPO3163 |   |   |   | <i>yfeN</i>                    | Putative exported protein Membranes, lipoproteins and porins                                   |
| YPO3164 | ■ |   |   | <i>cyoA</i>                    | Cytochrome O ubiquinol oxidas Aerobic respiration                                              |
| YPO3170 |   |   | ■ |                                | Conserved hypothetical protein Unknown                                                         |
| YPO3173 |   |   | ■ | <i>thiI</i>                    | Thiamine biosynthesis protein Thiamine Biosynthesis                                            |
| YPO3189 |   |   | ■ | <i>secD</i>                    | Protein-export membrane protei Transport/binding proteins                                      |
| YPO3190 |   |   | ■ | <i>yajC</i>                    | Putative membrane protein Membranes, lipoproteins and porins                                   |
| YPO3199 | ■ |   | ■ |                                | Probable short-chain dehydroge Unknown                                                         |
| YPO3200 | ■ | ■ | ■ | <i>malZ</i>                    | Putative maltodextrin glucosida Maltose operon                                                 |
| YPO3203 | ■ | ■ | ■ | <i>pstS</i>                    | Phosphate binding protein Transport/binding Anions                                             |

|         |   |   |                     |                                  |                                                                     |
|---------|---|---|---------------------|----------------------------------|---------------------------------------------------------------------|
| YPO3206 |   |   | <i>sbcD</i>         | Exonuclease SbcD                 | Degradation of DNA                                                  |
| YPO3212 | ■ |   | <i>rdgC</i>         | Recombination associated prote   | DNA replication, restriction/modification, recombination and repair |
| YPO3225 |   |   | <i>gpt, gpp, gx</i> | Xanthine-guanine phosphoribos    | Salvage of nucleosides and nucleotides                              |
| YPO3235 |   | ■ | <i>nqrF, nqr6</i>   | NADH-ubiquinone oxidoreduct      | Electron transport                                                  |
| YPO3237 |   | ■ | <i>nqrD, nqr4</i>   | Na+-translocating NADH-quinc     | Electron transport                                                  |
| YPO3244 |   |   | <i>yafH</i>         | Probable acyl-CoA dehydrogen     | Degradation of small molecule                                       |
| YPO3254 |   |   |                     | Putative amino acid ABC transp   | Transport/binding Amino acids and amines                            |
| YPO3260 | ■ |   |                     | Hypothetical protein             | Unknown                                                             |
| YPO3261 | ■ |   |                     | Probable amidase                 | Degradation of small molecule                                       |
| YPO3272 |   |   | <i>yfiQ</i>         | Putative acetyltransferase       | Unknown                                                             |
| YPO3278 | ■ |   | <i>yfiO</i>         | Putative lipoprotein             | Membranes, lipoproteins and porins                                  |
| YPO3279 | ■ | ■ | <i>yfiA</i>         | Putative sigma 54 modulation p   | Broad regulatory functions                                          |
| YPO3290 |   | ■ | <i>ydiY</i>         | Putative exported protein        | Membranes, lipoproteins and porins                                  |
| YPO3292 |   |   | <i>rplS</i>         | 50S ribosomal protein L19        | Ribosomal protein synthesis and modification                        |
| YPO3293 |   |   | <i>trmD</i>         | tRNA (guanine-N1)-methyltran     | Aminoacyl tRNA synthetases and their modification                   |
| YPO3294 |   |   | <i>rimM</i>         | 16S rRNA processing protein      | Ribosome maturation and modification                                |
| YPO3295 |   |   | <i>rpsP</i>         | 30S ribosomal protein S16        | Ribosomal protein synthesis and modification                        |
| YPO3300 | ■ | ■ | <i>luxS</i>         | Autoinducer-2 production prote   | AI-2                                                                |
| YPO3301 | ■ |   | <i>gshA, gsh-I</i>  | Glutamate--cysteine ligase       | Thioredoxin Biosynthesis                                            |
| YPO3302 | ■ |   | <i>yqaA</i>         | Putative membrane protein        | Membranes, lipoproteins and porins                                  |
| YPO3303 | ■ |   | <i>yqaB</i>         | Putative hydrolase               | Unknown                                                             |
| YPO3319 | ■ |   | <i>katY</i>         | Catalase-peroxidase              | Oxidative stress                                                    |
| YPO3320 |   | ■ | <i>cybC</i>         | Putative cytochrome B562         | Electron transport                                                  |
| YPO3321 | ■ | ■ | <i>cybB</i>         | Probable cytochrome B561         | Electron transport                                                  |
| YPO3323 |   |   | <i>dmsC</i>         | Anaerobic dimethyl sulfoxide re  | Anaerobic respiration                                               |
| YPO3327 |   |   | <i>fucR</i>         | Putative deoR-family regulatory  | Broad regulatory functions                                          |
| YPO3335 |   |   | <i>fumA, fumB</i>   | Fumarate hydratase, class I      | Tricarboxylic acid cycle                                            |
| YPO3340 |   |   |                     | Putative exogenous ferric sidero | Iron uptake                                                         |
| YPO3348 |   |   |                     | Transcriptional regulatory prote | Broad regulatory functions                                          |
| YPO3351 |   |   |                     | Putative dehydrogenase           | Unknown                                                             |
| YPO3359 |   | ■ |                     | Conserved hypothetical protein   | Unknown                                                             |
| YPO3360 |   | ■ | <i>ispF, mecS,</i>  | 2C-methyl-D-erythritol 2,4-cycl  | Central intermediary metabolism                                     |
| YPO3361 |   | ■ | <i>ispD, b2747</i>  | 4-diphosphocytidyl-2C-methyl-    | Central intermediary metabolism                                     |
| YPO3362 |   |   |                     | Conserved hypothetical protein   | Unknown                                                             |
| YPO3363 |   | ■ | <i>ygbE</i>         | Putative membrane protein        | Membranes, lipoproteins and porins                                  |
| YPO3364 |   |   | <i>cysC</i>         | Adenylylsulfate kinase           | Sulphur metabolism                                                  |
| YPO3365 |   | ■ | <i>cysN</i>         | Sulfate adenylyltransferase sub  | Sulphur metabolism                                                  |
| YPO3366 |   | ■ | <i>cysD</i>         | Sulfate adenylyltransferase sub  | Sulphur metabolism                                                  |
| YPO3367 |   | ■ | <i>cysG</i>         | Siroheme synthase                | Heme and porphyrin Biosynthesis                                     |
| YPO3369 |   |   |                     | Conserved hypothetical protein   | Unknown                                                             |
| YPO3372 |   |   | <i>cysJ</i>         | Sulfite reductase [NADPH] flav   | Sulphur metabolism                                                  |

|         |  |  |                    |                                   |                                                                     |
|---------|--|--|--------------------|-----------------------------------|---------------------------------------------------------------------|
| YPO3373 |  |  | <i>ygcM</i>        | Putative 6-pyruvoyl tetrahydrob   | Unknown                                                             |
| YPO3374 |  |  |                    | Conserved hypothetical protein    | Unknown                                                             |
| YPO3376 |  |  | <i>eno</i>         | Enolase                           | Glycolysis                                                          |
| YPO3377 |  |  | <i>pyrG</i>        | CTP synthase                      | Salvage of nucleosides and nucleotides                              |
| YPO3382 |  |  | <i>gsrA, degP,</i> | Global stress requirement protei  | Degradation of Proteins, peptides and glycopeptides                 |
| YPO3386 |  |  | <i>yadS</i>        | Putative membrane protein         | Membranes, lipoproteins and porins                                  |
| YPO3387 |  |  |                    | Conserved hypothetical protein    | Unknown                                                             |
| YPO3388 |  |  | <i>yadQ</i>        | Putative chloride channel protei  | Transport/binding Anions                                            |
| YPO3390 |  |  | <i>fhuB</i>        | Ferrichrome transport system pe   | Transport/binding Cations                                           |
| YPO3391 |  |  | <i>fhuD</i>        | Ferrichrome-binding periplasmi    | Transport/binding Cations                                           |
| YPO3393 |  |  | <i>mrcB, ponB</i>  | Penicillin-binding protein 1B     | Murein sacculus and peptidoglycan                                   |
| YPO3394 |  |  | <i>hrpB</i>        | ATP-dependent helicase            | DNA replication, restriction/modification, recombination and repair |
| YPO3397 |  |  | <i>dksA</i>        | DnaK suppressor protein homol     | Broad regulatory functions                                          |
| YPO3400 |  |  | <i>folK</i>        | 2-amino-4-hydroxy-6-hydroxyn      | Folic acid Biosynthesis                                             |
| YPO3410 |  |  | <i>yacC</i>        | Putative exported protein         | Membranes, lipoproteins and porins                                  |
| YPO3415 |  |  | <i>acnB</i>        | Aconitate hydratase 2             | Tricarboxylic acid cycle                                            |
| YPO3428 |  |  | <i>guaC</i>        | GMP reductase                     | Purine ribonucleotide biosynthesis                                  |
| YPO3432 |  |  |                    | Conserved hypothetical protein    | Unknown                                                             |
| YPO3439 |  |  |                    | Putative membrane protein         | Membranes, lipoproteins and porins                                  |
| YPO3443 |  |  | <i>valS</i>        | Valyl-tRNA synthetase             | Aminoacyl tRNA synthetases and their modification                   |
| YPO3448 |  |  |                    | Putative extracellular solute-bin | Transport/binding proteins                                          |
| YPO3454 |  |  | <i>nrdD</i>        | Anaerobic ribonucleoside-triphc   | 2'-deoxyribonucleotide biosynthesis                                 |
| YPO3471 |  |  |                    | Sugar transport system, permeas   | Transport/binding Carbohydrates,organic acids and alcohols          |
| YPO3476 |  |  |                    | Putative acetyltransferase        | Unknown                                                             |
| YPO3484 |  |  |                    | Conserved hypothetical protein    | Unknown                                                             |
| YPO3488 |  |  | <i>deaD, csdA,</i> | Cold-shock dead-box protein A     | Unknown                                                             |
| YPO3489 |  |  | <i>nlpI</i>        | Lipoprotein NlpI                  | Membranes, lipoproteins and porins                                  |
| YPO3499 |  |  | <i>secG</i>        | Protein-export membrane protei    | Transport/binding proteins                                          |
| YPO3505 |  |  | <i>greA</i>        | Transcription elongation factor   | RNA synthesis, RNA modification and DNA transcription               |
| YPO3507 |  |  | <i>basR, pmrA</i>  | Two-component system respons      | Broad regulatory functions                                          |
| YPO3510 |  |  |                    | Putative membrane protein         | Membranes, lipoproteins and porins                                  |
| YPO3511 |  |  | <i>rpmA</i>        | 50S ribosomal protein L27         | Ribosomal protein synthesis and modification                        |
| YPO3512 |  |  | <i>rplU</i>        | 50S ribosomal protein L21         | Ribosomal protein synthesis and modification                        |
| YPO3513 |  |  | <i>ispB, cel</i>   | Octaprenyl-diphosphate synthas    | Menaquinone and ubiquinine Biosynthesis                             |
| YPO3518 |  |  |                    | Putative exported protein         | Membranes, lipoproteins and porins                                  |
| YPO3520 |  |  | <i>fbp, fdp</i>    | Fructose-1,6-bisphosphatase       | Gluconeogenesis                                                     |
| YPO3527 |  |  |                    | Conserved hypothetical protein    | Unknown                                                             |
| YPO3528 |  |  |                    | Putative exported protein         | Membranes, lipoproteins and porins                                  |
| YPO3529 |  |  | <i>cysQ, amtA</i>  | Inositol monophosphatase famil    | Sulphur metabolism                                                  |
| YPO3530 |  |  | <i>cpdB</i>        | 2',3'-cyclic-nucleotide 2'-phosp  | Salvage of nucleosides and nucleotides                              |
| YPO3536 |  |  | <i>rplI</i>        | 50S ribosomal protein L9          | Ribosomal protein synthesis and modification                        |



|         |  |  |                     |                                    |                                                                     |
|---------|--|--|---------------------|------------------------------------|---------------------------------------------------------------------|
| YPO3537 |  |  | <i>rpsR</i>         | 30S ribosomal protein S18          | Ribosomal protein synthesis and modification                        |
| YPO3538 |  |  | <i>priB</i>         | Primosomal replication protein     | DNA replication, restriction/modification, recombination and repair |
| YPO3539 |  |  | <i>rpsF</i>         | 30S ribosomal protein S6           | Ribosomal protein synthesis and modification                        |
| YPO3540 |  |  |                     | Hypothetical protein               | Unknown                                                             |
| YPO3562 |  |  | <i>rpsI</i>         | 30S ribosomal protein S9           | Ribosomal protein synthesis and modification                        |
| YPO3563 |  |  | <i>rplM</i>         | 50S ribosomal protein L13          | Ribosomal protein synthesis and modification                        |
| YPO3565 |  |  |                     | Putative membrane protein          | Membranes, lipoproteins and porins                                  |
| YPO3566 |  |  | <i>degQ, hhoA</i>   | Protease                           | Degradation of Proteins, peptides and glycopeptides                 |
| YPO3569 |  |  | <i>murA, murZ</i>   | UDP-N-acetylglucosamine 1-ca       | Murein sacculus and peptidoglycan                                   |
| YPO3570 |  |  |                     | BolA-like protein                  | Unknown                                                             |
| YPO3580 |  |  |                     | Conserved hypothetical protein     | Unknown                                                             |
| YPO3581 |  |  | <i>yhbG</i>         | Probable ABC transporter ATP-l     | Transport/binding proteins                                          |
| YPO3582 |  |  | <i>rpoN, glnF,</i>  | RNA polymerase sigma-54 fact       | RNA synthesis, RNA modification and DNA transcription               |
| YPO3583 |  |  | <i>yhbH</i>         | Probable sigma (54) modulation     | RNA synthesis, RNA modification and DNA transcription               |
| YPO3588 |  |  | <i>pyrB</i>         | Aspartate carbamoyltransferase     | Pyrimidine ribonucleotide biosynthesis                              |
| YPO3589 |  |  | <i>pyrI</i>         | Aspartate carbamoyltransferase     | Broad regulatory functions                                          |
| YPO3606 |  |  |                     | Putative Rhs accessory genetic e   | Unknown                                                             |
| YPO3610 |  |  |                     | Conserved hypothetical protein     | Unknown                                                             |
| YPO3612 |  |  |                     | Putative transcriptional regulato  | Broad regulatory functions                                          |
| YPO3624 |  |  | <i>ssuA</i>         | Putative aliphatic sulfonates bin  | Transport/binding proteins                                          |
| YPO3625 |  |  | <i>ssuD</i>         | Alkanesulfonate monooxygenas       | Sulphur metabolism                                                  |
| YPO3626 |  |  | <i>ssuC</i>         | Putative aliphatic sulfonates tra  | Transport/binding proteins                                          |
| YPO3631 |  |  |                     | Putative exported protein          | Membranes, lipoproteins and porins                                  |
| YPO3632 |  |  | <i>ddg, lpxP</i>    | Putative membrane protein          | Membranes, lipoproteins and porins                                  |
| YPO3639 |  |  | <i>yghU</i>         | Putative glutathione S-transferase | Unknown                                                             |
| YPO3640 |  |  |                     | Putative exported protein          | Membranes, lipoproteins and porins                                  |
| YPO3643 |  |  | <i>cspa2</i>        | Major cold shock protein Cspa2     | Adaptions and atypical conditions                                   |
| YPO3644 |  |  | <i>cspa1</i>        | Major cold shock protein Cspa1     | Adaptions and atypical conditions                                   |
| YPO3645 |  |  |                     | Hypothetical protein               | Unknown                                                             |
| YPO3646 |  |  | <i>pcp, pcpY, s</i> | Outer membrane lipoprotein         | Membranes, lipoproteins and porins                                  |
| YPO3647 |  |  |                     | Conserved hypothetical protein     | Unknown                                                             |
| YPO3648 |  |  |                     | Putative 2-hydroxy-3-oxopropic     | Degradation of carbon compounds                                     |
| YPO3649 |  |  |                     | Putative gamma carboxymucon        | Degradation of small molecule                                       |
| YPO3650 |  |  |                     | Putative metabolite transport pro  | Transport/binding proteins                                          |
| YPO3652 |  |  |                     | Hypothetical protein               | Unknown                                                             |
| YPO3653 |  |  |                     | Putative colicin immunity protei   | Colicin-related functions                                           |
| YPO3654 |  |  | <i>fis</i>          | DNA-binding protein Fis            | DNA replication, restriction/modification, recombination and repair |
| YPO3655 |  |  |                     | Conserved hypothetical protein     | Unknown                                                             |
| YPO3658 |  |  | <i>accC, fabG</i>   | Biotin carboxylase                 | Fatty acid biosynthesis                                             |
| YPO3661 |  |  |                     | Putative membrane protein          | Membranes, lipoproteins and porins                                  |
| YPO3665 |  |  | <i>mreB, envB,</i>  | Rod shape-determining protein      | Murein sacculus and peptidoglycan                                   |

|         |  |  |                   |                                                          |                                                             |
|---------|--|--|-------------------|----------------------------------------------------------|-------------------------------------------------------------|
| YPO3666 |  |  | <i>mreC</i>       | Rod shape-determining protein                            | Murein sacculus and peptidoglycan                           |
| YPO3667 |  |  | <i>mreD</i>       | Rod shape-determining protein                            | Murein sacculus and peptidoglycan                           |
| YPO3668 |  |  | <i>yhdE</i>       | Putative inhibitor of septum form                        | Unknown                                                     |
| YPO3681 |  |  |                   | Putative insecticidal toxin                              | Pathogenicity                                               |
| YPO3682 |  |  |                   | Putative lysR-family transcription factor                | Broad regulatory functions                                  |
| YPO3686 |  |  | <i>yhcP</i>       | Putative membrane protein                                | Membranes, lipoproteins and porins                          |
| YPO3687 |  |  |                   | Putative succinate-semialdehyde dehydrogenase            | Central intermediary metabolism                             |
| YPO3689 |  |  |                   | Putative ribonuclease                                    | Degradation of RNA                                          |
| YPO3690 |  |  |                   | Putative ribonuclease inhibitor                          | Unknown                                                     |
| YPO3695 |  |  | <i>rnk</i>        | Regulator of nucleoside diphosphate                      | Broad regulatory functions                                  |
| YPO3696 |  |  | <i>treC, olgH</i> | Putative trehalose-6-phosphate 1-phosphatase             | Degradation of carbon compounds                             |
| YPO3697 |  |  | <i>treB</i>       | PTS system, trehalose-specific I                         | Transport/binding Carbohydrates, organic acids and alcohols |
| YPO3705 |  |  |                   | Conserved hypothetical protein                           | Unknown                                                     |
| YPO3706 |  |  |                   | Conserved hypothetical protein                           | Unknown                                                     |
| YPO3707 |  |  |                   | Conserved hypothetical protein                           | Unknown                                                     |
| YPO3708 |  |  |                   | Conserved hypothetical protein                           | Unknown                                                     |
| YPO3710 |  |  | <i>malM, molA</i> | Maltose operon periplasmic protein                       | Maltose operon                                              |
| YPO3711 |  |  | <i>lamB, malB</i> | Maltoporin                                               | Maltose operon                                              |
| YPO3712 |  |  | <i>malK</i>       | Maltose, maltodextrin transport system                   | Maltose operon                                              |
| YPO3713 |  |  |                   | Hypothetical protein                                     | Unknown                                                     |
| YPO3714 |  |  | <i>malE</i>       | Maltose-binding periplasmic protein                      | Maltose operon                                              |
| YPO3715 |  |  | <i>malF</i>       | Maltose transport system permease                        | Maltose operon                                              |
| YPO3716 |  |  | <i>malG</i>       | Maltose transport system permease                        | Maltose operon                                              |
| YPO3718 |  |  | <i>pgi</i>        | Glucose-6-phosphate isomerase                            | Glycolysis                                                  |
| YPO3722 |  |  | <i>metH</i>       | 5-Methyltetrahydrofolate--homocysteine methyltransferase | Aspartate family biosynthesis                               |
| YPO3724 |  |  | <i>aceK</i>       | Isocitrate dehydrogenase kinase                          | Glyoxylate bypass                                           |
| YPO3725 |  |  | <i>aceA, icl</i>  | Isocitrate lyase                                         | Glyoxylate bypass                                           |
| YPO3726 |  |  | <i>aceB, mas</i>  | Malate synthase A                                        | Glyoxylate bypass                                           |
| YPO3727 |  |  | <i>metA</i>       | Homoserine O-succinyltransferase                         | Aspartate family biosynthesis                               |
| YPO3731 |  |  | <i>hupA</i>       | DNA-binding protein HU-alpha                             | Adaptions and atypical conditions                           |
| YPO3737 |  |  | <i>rsd</i>        | Regulator of sigma D                                     | Broad regulatory functions                                  |
| YPO3738 |  |  |                   | Hypothetical protein                                     | Unknown                                                     |
| YPO3740 |  |  | <i>thiE</i>       | Thiamine-phosphate pyrophosphatase                       | Thiamine Biosynthesis                                       |
| YPO3741 |  |  | <i>thiF</i>       | Thiamine biosynthesis protein T                          | Thiamine Biosynthesis                                       |
| YPO3743 |  |  | <i>thiH</i>       | Thiamine biosynthesis protein T                          | Thiamine Biosynthesis                                       |
| YPO3746 |  |  | <i>rpoC, tabB</i> | DNA-directed RNA polymerase                              | RNA synthesis, RNA modification and DNA transcription       |
| YPO3747 |  |  | <i>rpoB, groN</i> | DNA-directed RNA polymerase                              | RNA synthesis, RNA modification and DNA transcription       |
| YPO3748 |  |  | <i>rplL</i>       | 50S ribosomal protein L7,L12                             | Ribosomal protein synthesis and modification                |
| YPO3749 |  |  | <i>rplJ</i>       | 50S ribosomal protein L10                                | Ribosomal protein synthesis and modification                |
| YPO3750 |  |  | <i>rplA</i>       | 50S ribosomal protein L1                                 | Ribosomal protein synthesis and modification                |
| YPO3751 |  |  | <i>rplK, relC</i> | 50S ribosomal protein L11                                | Ribosomal protein synthesis and modification                |

|         |   |                       |                                  |                                                             |
|---------|---|-----------------------|----------------------------------|-------------------------------------------------------------|
| YPO3752 |   | <i>nusG</i>           | Transcription antitermination pr | RNA synthesis, RNA modification and DNA transcription       |
| YPO3753 |   | <i>secE, prlG</i>     | Preprotein translocase SecE sub  | Transport/binding proteins                                  |
| YPO3754 | ■ | <i>tufA, tufB</i>     | Elongation factor Tu             | Protein translation and modification                        |
| YPO3760 |   | <i>murB</i>           | UDP-N-acetylenolpyruvoylgluc     | Murein sacculus and peptidoglycan                           |
| YPO3766 |   | <i>fadB, oldB</i>     | Fatty acid oxidation complex alj | Degradation of small molecule                               |
| YPO3767 |   | <i>fadA, oldA</i>     | 3-ketoacyl-CoA thiolase          | Degradation of small molecule                               |
| YPO3768 |   | <i>fadI, fre, flr</i> | NAD(P)H-flavin reductase         | Electron transport                                          |
| YPO3769 |   |                       | Conserved hypothetical protein   | Unknown                                                     |
| YPO3775 | ■ | <i>tatD, mttC</i>     | Deoxyribonuclease TatD (pseud    | Degradation of DNA                                          |
| YPO3776 | ■ | <i>tatC, mttB</i>     | Sec-independent protein translo  | Transport/binding proteins                                  |
| YPO3779 |   | <i>aarF</i>           | Ubiquinone biosynthesis proteir  | Menaquinone and ubiquinine Biosynthesis                     |
| YPO3783 | ■ |                       | Putative membrane protein        | Membranes, lipoproteins and porins                          |
| YPO3784 |   |                       | Putative carbon starvation prote | Adaptions and atypical conditions                           |
| YPO3785 |   |                       | Conserved hypothetical protein   | Unknown                                                     |
| YPO3786 |   | <i>udp</i>            | Uridine phosphorylase            | Salvage of nucleosides and nucleotides                      |
| YPO3787 |   |                       | Putative carboxymethylenebuter   | Degradation of small molecule                               |
| YPO3788 | ■ | <i>metE</i>           | 5-methyltetrahydropteroyltriglu  | Aspartate family biosynthesis                               |
| YPO3789 | ■ | <i>metR</i>           | LysR-family transcriptional reg  | Broad regulatory functions                                  |
| YPO3797 |   |                       | Putative exported protein        | Membranes, lipoproteins and porins                          |
| YPO3811 |   | <i>rpoH, htpR</i>     | RNA polymerase sigma-32 fact     | RNA synthesis, RNA modification and DNA transcription       |
| YPO3817 |   |                       | Putative membrane protein        | Membranes, lipoproteins and porins                          |
| YPO3819 | ■ | <i>yhhN</i>           | Putative membrane protein        | Membranes, lipoproteins and porins                          |
| YPO3820 |   | <i>zntA</i>           | Putative P-type cation-transloca | Transport/binding Cations                                   |
| YPO3829 | ■ |                       | Putative haloacid dehalogenase-  | Unknown                                                     |
| YPO3834 |   | <i>pldA</i>           | Phospholipase A                  | Central intermediary metabolism                             |
| YPO3838 | ■ |                       | Conserved hypothetical protein   | Unknown                                                     |
| YPO3839 | ■ |                       | Conserved hypothetical protein   | Unknown                                                     |
| YPO3840 | ■ |                       | Putative TetR-family regulatory  | Broad regulatory functions                                  |
| YPO3864 |   | <i>rffE, wecB,</i>    | UDP-N-acetylglucosamine 2-ep     | Surface polysaccharides, lipopolysaccharides and antigens   |
| YPO3865 |   | <i>wzzE, wzz, l</i>   | Putative lipopolysaccharide bio  | Surface polysaccharides, lipopolysaccharides and antigens   |
| YPO3866 |   | <i>rfe, b3784</i>     | Putative undecaprenyl-phosphat   | Surface polysaccharides, lipopolysaccharides and antigens   |
| YPO3873 |   | <i>ppiC</i>           | Peptidyl-prolyl cis-trans isomer | Protein translation and modification                        |
| YPO3888 | ■ | <i>ihvC</i>           | Ketol-acid reductoisomerase      | Pyruvate family biosynthesis                                |
| YPO3901 | ■ | <i>ihvG</i>           | Acetolactate synthase isozyme I  | Pyruvate family biosynthesis                                |
| YPO3903 |   |                       | Conserved hypothetical protein   | Unknown                                                     |
| YPO3911 |   | <i>trmA</i>           | tRNA (uracil-5)-methyltransfer   | Aminoacyl tRNA synthetases and their modification           |
| YPO3912 |   | <i>yjD</i>            | Putative membrane protein        | Membranes, lipoproteins and porins                          |
| YPO3924 |   | <i>argH</i>           | Putative argininosuccinate lyase | Glutamate family biosynthesis                               |
| YPO3937 | ■ | <i>glpD, glyD</i>     | Aerobic glycerol-3-phosphate d   | Central intermediary metabolism                             |
| YPO3938 |   | <i>glgP, glgY</i>     | Glycogen phosphorylase           | Synthesis and modification of Polysaccharides (cytoplasmic) |
| YPO3940 |   | <i>glgC</i>           | Glucose-1-phosphate adenylyltr   | Synthesis and modification of Polysaccharides (cytoplasmic) |

|         |  |  |                                                    |                                                            |
|---------|--|--|----------------------------------------------------|------------------------------------------------------------|
| YPO3944 |  |  | Putative invasin                                   | Pathogenicity                                              |
| YPO3953 |  |  | Putative gluconokinase                             | Degradation of carbon compounds                            |
| YPO3954 |  |  | <i>gntT, usgA,</i> Putative gluconate permease     | Transport/binding Carbohydrates,organic acids and alcohols |
| YPO3967 |  |  | Phosphate transport protein                        | Transport/binding Anions                                   |
| YPO3969 |  |  | <i>uspB</i> Universal stress protein B             | Adaptions and atypical conditions                          |
| YPO3970 |  |  | <i>uspA</i> Universal stress protein A             | Adaptions and atypical conditions                          |
| YPO3976 |  |  | Conserved hypothetical protein                     | Unknown                                                    |
| YPO3977 |  |  | <i>gor</i> Glutathione reductase                   | Oxidative stress                                           |
| YPO3979 |  |  | GntP family permease                               | Transport/binding Carbohydrates,organic acids and alcohols |
| YPO3986 |  |  | <i>cdh</i> CDP-diacylglycerol pyrophosph           | Fatty acid biosynthesis                                    |
| YPO3991 |  |  | Putative insulinase family prote                   | Degradation of Proteins, peptides and glycopeptides        |
| YPO3992 |  |  | <i>dctA</i> C4-dicarboxylate transport prot        | Transport/binding Carbohydrates,organic acids and alcohols |
| YPO4003 |  |  | <i>dppA</i> Periplasmic dipeptide transport        | Transport/binding proteins                                 |
| YPO4013 |  |  | <i>yhjW</i> Putative membrane protein              | Membranes, lipoproteins and porins                         |
| YPO4016 |  |  | <i>hutH</i> Histidine ammonia-lyase                | Degradation of amino acids                                 |
| YPO4018 |  |  | <i>cysM</i> Pyridoxal-phosphate dependent          | Unknown                                                    |
| YPO4019 |  |  | Putative phosphoribosyl transfe                    | Unknown                                                    |
| YPO4020 |  |  | Putative membrane protein                          | Membranes, lipoproteins and porins                         |
| YPO4022 |  |  | <i>fitA</i> Putative iron transport protein        | Transport/binding Cations                                  |
| YPO4025 |  |  | <i>fitD</i> Putative iron ABC transporter, A       | Transport/binding Cations                                  |
| YPO4048 |  |  | <i>mdfA, cmr</i> Multidrug translocase             | Drug/analogue sensitivity                                  |
| YPO4061 |  |  | <i>sodA</i> Superoxide dismutase [Mn]              | Oxidative stress                                           |
| YPO4063 |  |  | Putative membrane protein                          | Membranes, lipoproteins and porins                         |
| YPO4064 |  |  | Hypothetical protein                               | Unknown                                                    |
| YPO4070 |  |  | <i>yiaF</i> Putative exported protein              | Membranes, lipoproteins and porins                         |
| YPO4071 |  |  | <i>glyS</i> Glycyl-tRNA synthetase beta su         | Aminoacyl tRNA synthetases and their modification          |
| YPO4072 |  |  | <i>glyQ</i> Glycyl-tRNA synthetase alpha s         | Aminoacyl tRNA synthetases and their modification          |
| YPO4080 |  |  | <i>malS</i> Alpha-amylase protein                  | Maltose operon                                             |
| YPO4082 |  |  | <i>avtA</i> Valine--pyruvate aminotransfer         | Pyruvate family biosynthesis                               |
| YPO4084 |  |  | <i>ibpB, hslS, i</i> Heat shock protein            | Adaptions and atypical conditions                          |
| YPO4085 |  |  | <i>ibpA, hslT, i</i> Heat shock protein            | Adaptions and atypical conditions                          |
| YPO4086 |  |  | Putative lipoprotein                               | Membranes, lipoproteins and porins                         |
| YPO4093 |  |  | Putative haloacid dehalogenase-                    | Unknown                                                    |
| YPO4100 |  |  | <i>rpmH, ssaF,</i> Ribosomal protein L34           | Ribosomal protein synthesis and modification               |
| YPO4101 |  |  | <i>rnpA</i> Ribonuclease P protein                 | Degradation of RNA                                         |
| YPO4102 |  |  | <i>ydC</i> Probable membrane protein               | Membranes, lipoproteins and porins                         |
| YPO4105 |  |  | Putative exported protein                          | Membranes, lipoproteins and porins                         |
| YPO4107 |  |  | <i>yieG</i> Xanthine,uracil permeases fami         | Transport/binding Carbohydrates,organic acids and alcohols |
| YPO4109 |  |  | Putative amino acid transport sy                   | Transport/binding Amino acids and amines                   |
| YPO4110 |  |  | <i>gltJ</i> ABC transporter permease               | Transport/binding proteins                                 |
| YPO4113 |  |  | <i>phoU, nmp,</i> Putative phosphate transport sys | Central intermediary metabolism                            |

|            |  |  |                   |                                  |                              |
|------------|--|--|-------------------|----------------------------------|------------------------------|
| YPO4114    |  |  | <i>pstB, phoT</i> | Putative phosphate transport AT  | Transport/binding Anions     |
| YPO4115    |  |  | <i>pstA, phoT</i> | Putative phosphate transport sys | Transport/binding Anions     |
| YPO4116    |  |  | <i>pstC, phoW</i> | Putative phosphate transport sys | Transport/binding Anions     |
| YPO4119    |  |  | <i>glmU</i>       | UDP-N-acetylglucosamine pyro     | Sugar nucleotides metabolism |
| YPO4120    |  |  | <i>atpC, uncC</i> | ATP synthase epsilon subunit pr  | ATP-proton motive force      |
| YPO4122    |  |  | <i>atpG, uncG</i> | ATP synthase gamma subunit pr    | ATP-proton motive force      |
| YPO4124    |  |  | <i>atpH, uncH</i> | ATP synthase delta subunit prot  | ATP-proton motive force      |
| YPO4125    |  |  | <i>atpF, uncF</i> | ATP synthase subunit B protein   | ATP-proton motive force      |
| YPO4127    |  |  | <i>atpB, uncB</i> | ATP synthase subunit B protein   | ATP-proton motive force      |
| YPO4128    |  |  | <i>atpI, uncl</i> | ATP synthase protein I           | ATP-proton motive force      |
| YPO4130    |  |  | <i>gidA</i>       | Glucose inhibited division prote | Cell division                |
| YPPCP1.08c |  |  |                   | Putative Transcriptional Regulat |                              |
| yscB       |  |  | <i>yscB</i>       | Type III Secretion Apparatus Cc  | Type III Secretion System    |
| yscC       |  |  | <i>yscC</i>       | Outer Membrane Secretin Precu    | Type III Secretion System    |
| yscD       |  |  | <i>yscD</i>       | Virulence Protein                | Type III Secretion System    |
| yscE       |  |  | <i>yscE</i>       | Type III Secretion Apparatus Cc  | Type III Secretion System    |
| yscF       |  |  | <i>yscF</i>       | Needle Complex Major Subunit     | Type III Secretion System    |
| yscG       |  |  | <i>yscG</i>       | Type III Secretion Apparatus Cc  | Type III Secretion System    |
| yscH       |  |  | <i>yscH</i>       |                                  | Type III Secretion System    |
| yscI       |  |  | <i>yscI</i>       |                                  | Type III Secretion System    |
| yscJ       |  |  | <i>yscJ</i>       |                                  | Type III Secretion System    |
| yscK       |  |  | <i>yscK</i>       | Type III Secretion Apparatus Cc  | Type III Secretion System    |
| yscL       |  |  | <i>yscL</i>       | Type III Secretion System Prote  | Type III Secretion System    |
| yscM       |  |  | <i>yscM</i>       |                                  | Type III Secretion System    |
| yscN       |  |  | <i>yscN</i>       | Type III Secretion System Atpa   | Type III Secretion System    |
| yscO       |  |  | <i>yscO</i>       | Type III Secretion Apparatus Cc  | Type III Secretion System    |
| yscP       |  |  | <i>yscP</i>       | Type III Secretion Apparatus Cc  | Type III Secretion System    |
| yscQ       |  |  | <i>yscQ</i>       | Type III Secretion System Prote  | Type III Secretion System    |
| yscR       |  |  | <i>yscR</i>       | Type III Secretion System Prote  | Type III Secretion System    |
| yscS       |  |  | <i>yscS</i>       | Needle Complex Export Protein    | Type III Secretion System    |
| yscT       |  |  | <i>yscT</i>       | Needle Complex Export Protein    | Type III Secretion System    |
| yscU       |  |  | <i>yscU</i>       | Needle Complex Export Protein    | Type III Secretion System    |
| yscX       |  |  | <i>yscX</i>       | Hypothetical Protein             | Type III Secretion System    |
| yscY       |  |  | <i>yscY</i>       | Hypothetical Protein             | Type III Secretion System    |
